# Supplementary material for: miR‐322 treatment rescues cell apoptosis and neural tube defect formation through silencing NADPH oxidase 4
Source: PubMed Central journal article supplement (PMC7415201; doi:10.1111/cns.13383), 2020-04-24
Supplement: CNS-26-902-s002.pdf [file CNS-26-902-s002.pdf]

Original western blot images:

### Marker Figure

$\beta$ -actin

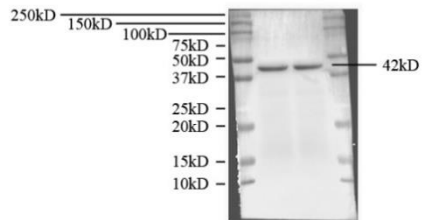

NOX4

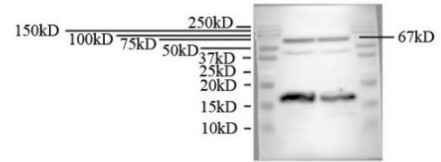

Cleaved Caspase-3

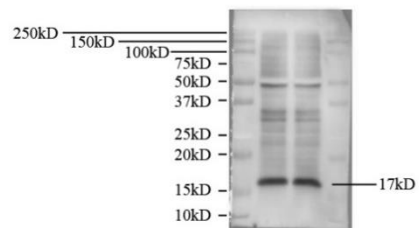

Bcl-2

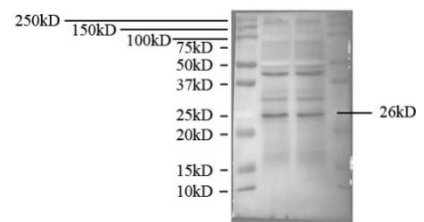

Bax

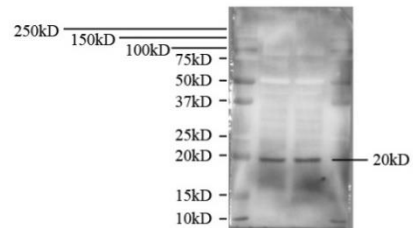

Figure 1.D

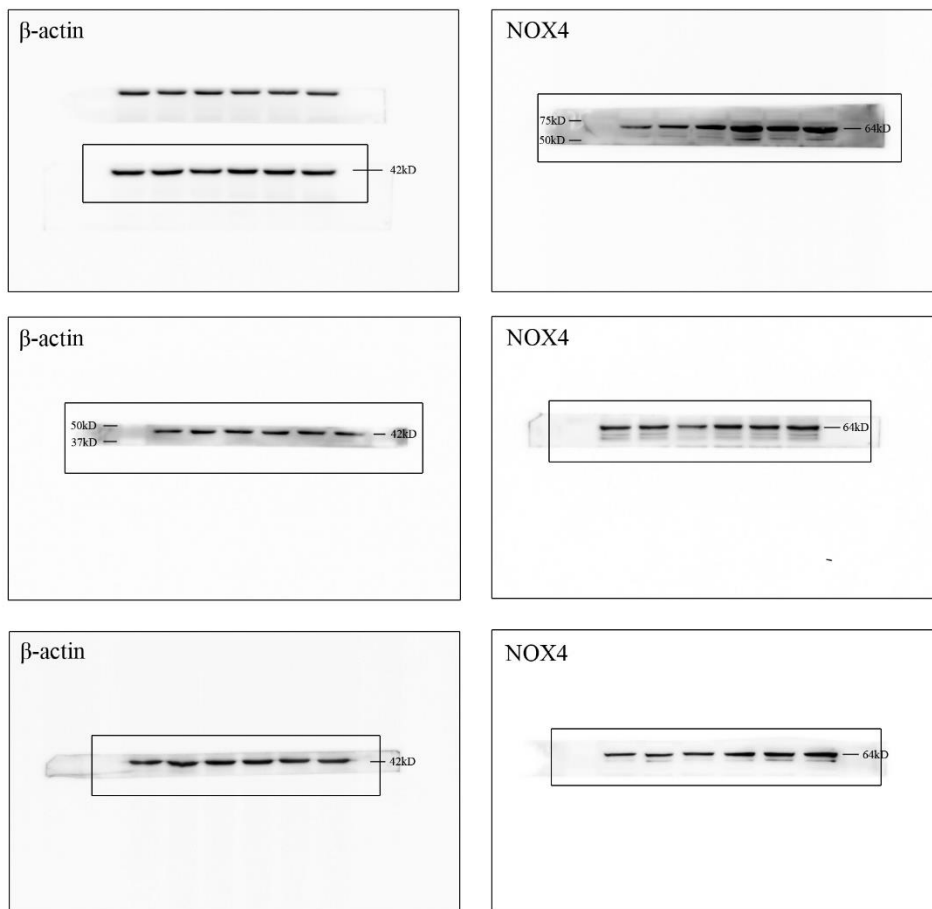

Figure.3.C

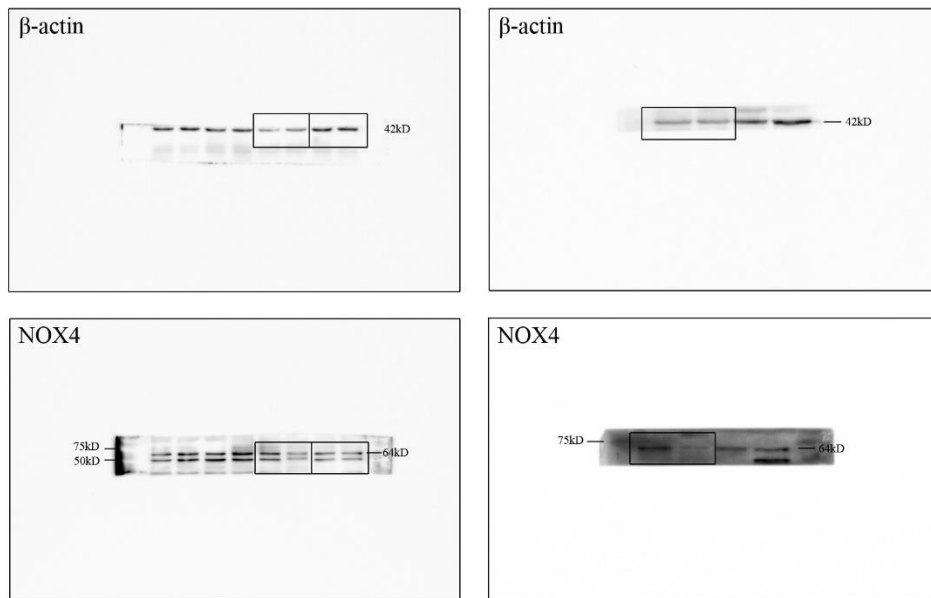

Figure.3.F

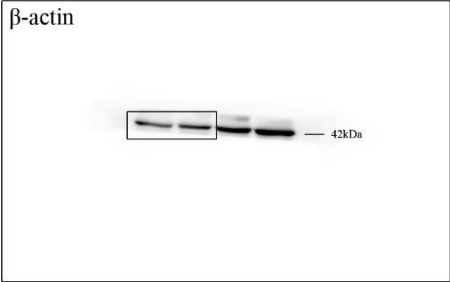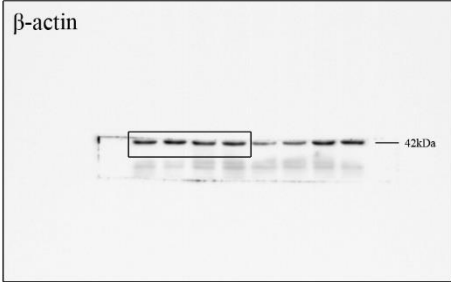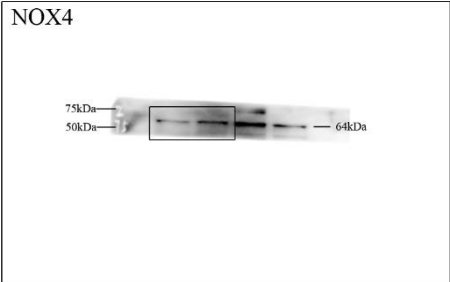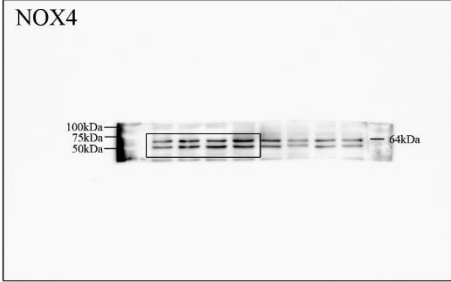



Figure.4.A

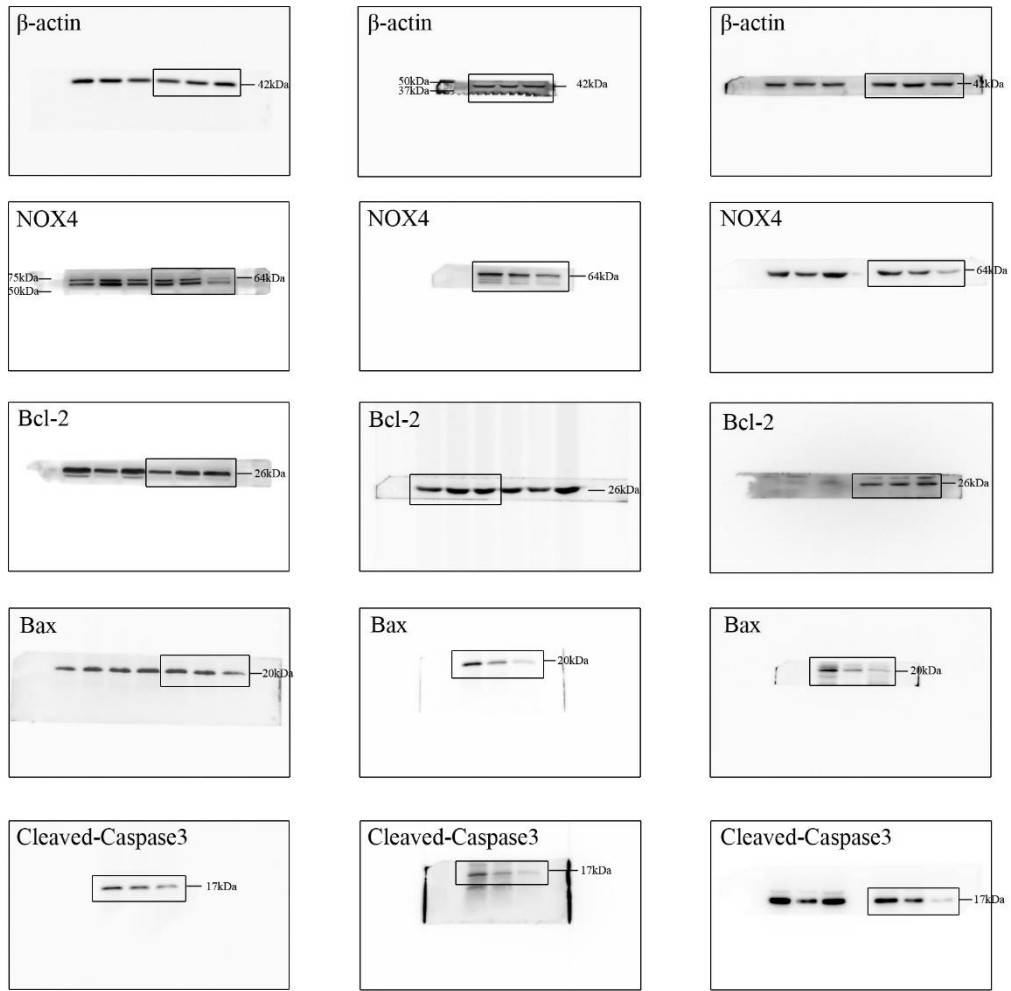

Figure.4.B

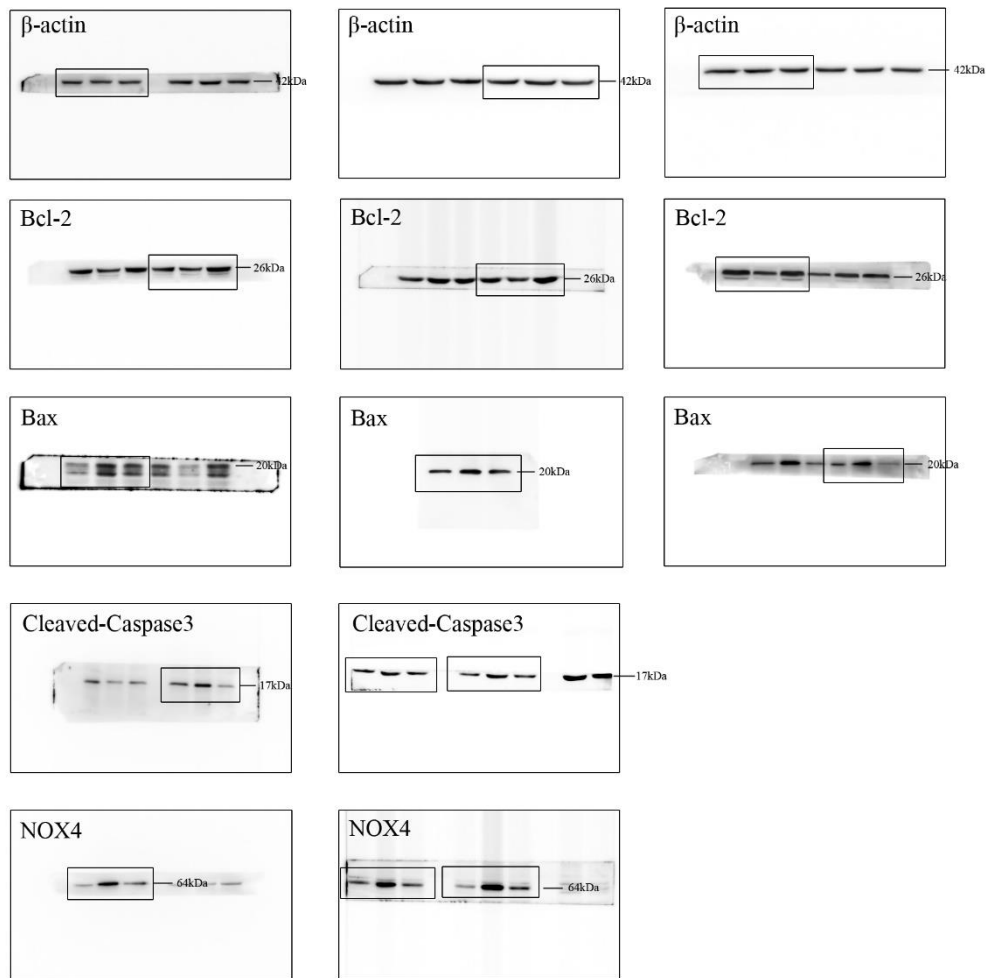

Figure. 5. D

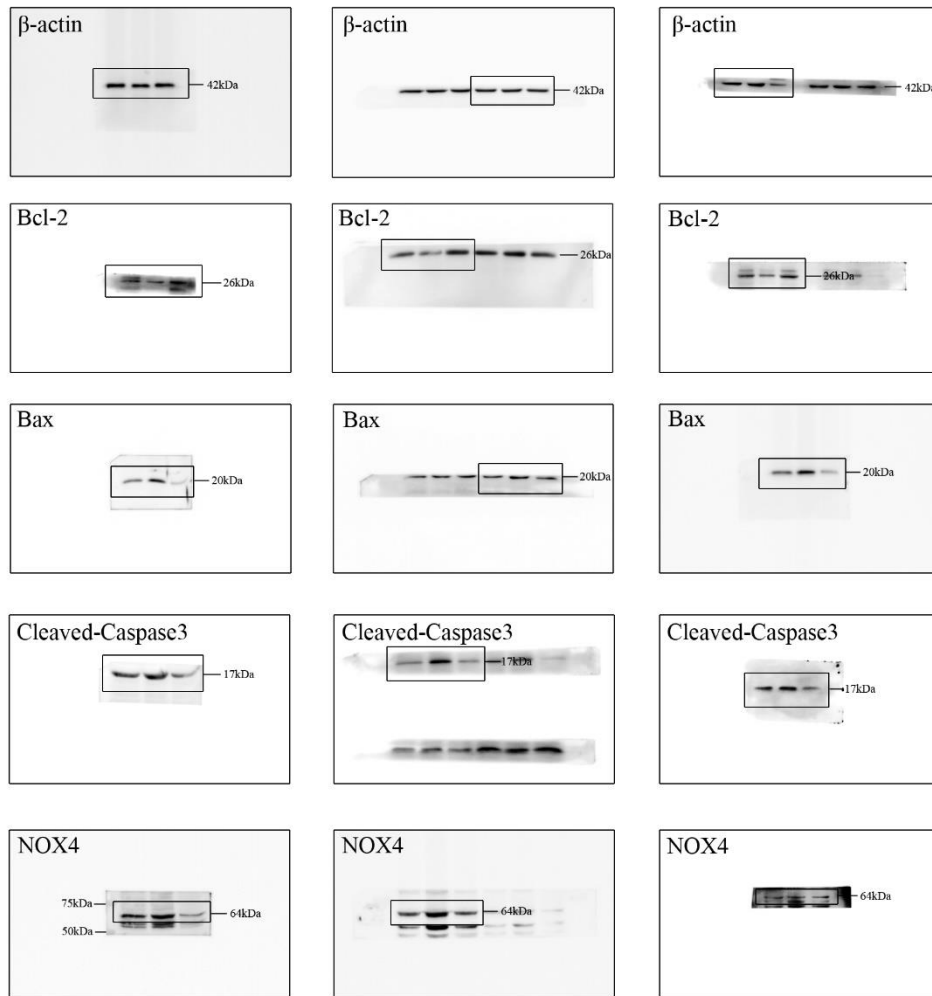

# Statistic report:

## Figure 1C

GraphPad Prism 7.00 - [Object in 统计图]

|         | Group A  | Group B  | Group C | Group D | Group E | Group F | Group G | Group H | Group I | Group J | Group K | Group L |
|---------|----------|----------|---------|---------|---------|---------|---------|---------|---------|---------|---------|---------|
| control | NTDs     | Title    | Title   | Title   | Title   | Title   | Title   | Title   | Title   | Title   | Title   | Title   |
|         | Y        | Y        | Y       | Y       | Y       | Y       | Y       | Y       | Y       | Y       | Y       | Y       |
| 1       | 0.840034 | 0.588234 |         |         |         |         |         |         |         |         |         |         |
| 2       | 1.079515 | 0.484136 |         |         |         |         |         |         |         |         |         |         |
| 3       | 1.184461 | 0.941442 |         |         |         |         |         |         |         |         |         |         |
| 4       | 1.201520 | 0.783996 |         |         |         |         |         |         |         |         |         |         |
| 5       | 0.694468 | 0.502588 |         |         |         |         |         |         |         |         |         |         |
| 6       |          |          |         |         |         |         |         |         |         |         |         |         |
| 7       |          |          |         |         |         |         |         |         |         |         |         |         |
| 8       |          |          |         |         |         |         |         |         |         |         |         |         |
| 9       |          |          |         |         |         |         |         |         |         |         |         |         |
| 10      |          |          |         |         |         |         |         |         |         |         |         |         |
| 11      |          |          |         |         |         |         |         |         |         |         |         |         |
| 12      |          |          |         |         |         |         |         |         |         |         |         |         |
| 13      |          |          |         |         |         |         |         |         |         |         |         |         |
| 14      |          |          |         |         |         |         |         |         |         |         |         |         |
| 15      |          |          |         |         |         |         |         |         |         |         |         |         |
| 16      |          |          |         |         |         |         |         |         |         |         |         |         |
| 17      |          |          |         |         |         |         |         |         |         |         |         |         |
| 18      |          |          |         |         |         |         |         |         |         |         |         |         |
| 19      |          |          |         |         |         |         |         |         |         |         |         |         |
| 20      |          |          |         |         |         |         |         |         |         |         |         |         |
| 21      |          |          |         |         |         |         |         |         |         |         |         |         |
| 22      |          |          |         |         |         |         |         |         |         |         |         |         |

GraphPad Prism 7.00 - [Object in 统计图]

|                                        | A          | B          | C     | D     | E     | F     | G     | H     | I     |
|----------------------------------------|------------|------------|-------|-------|-------|-------|-------|-------|-------|
| Col. stats                             | Data Set-A | Data Set-B | Title | Title | Title | Title | Title | Title | Title |
|                                        | Y          | Y          | Y     | Y     | Y     | Y     | Y     | Y     | Y     |
| 5 Median                               | 1.08       | 0.5882     |       |       |       |       |       |       |       |
| 6 75% Percentile                       | 1.193      | 0.8627     |       |       |       |       |       |       |       |
| 7 Maximum                              | 1.202      | 0.9414     |       |       |       |       |       |       |       |
| 8                                      |            |            |       |       |       |       |       |       |       |
| 9 Mean                                 | 1          | 0.6601     |       |       |       |       |       |       |       |
| 10 Std. Deviation                      | 0.2235     | 0.1971     |       |       |       |       |       |       |       |
| 11 Std. Error of Mean                  | 0.09997    | 0.08816    |       |       |       |       |       |       |       |
| 12                                     |            |            |       |       |       |       |       |       |       |
| 13 Lower 95% CI of mean                | 0.7224     | 0.4153     |       |       |       |       |       |       |       |
| 14 Upper 95% CI of mean                | 1.278      | 0.9048     |       |       |       |       |       |       |       |
| 15                                     |            |            |       |       |       |       |       |       |       |
| 16 Sum                                 | 5          | 3.3        |       |       |       |       |       |       |       |
| 17                                     |            |            |       |       |       |       |       |       |       |
| 18 Shapiro-Wilk normality test         |            |            |       |       |       |       |       |       |       |
| 19 W                                   | 0.883      | 0.8896     |       |       |       |       |       |       |       |
| 20 P value                             | 0.3233     | 0.3552     |       |       |       |       |       |       |       |
| 21 Passed normality test (alpha=0.05)? | Yes        | Yes        |       |       |       |       |       |       |       |
| 22 P value summary                     | ns         | ns         |       |       |       |       |       |       |       |
| 23                                     |            |            |       |       |       |       |       |       |       |
| 24                                     |            |            |       |       |       |       |       |       |       |
| 25                                     |            |            |       |       |       |       |       |       |       |
| 26                                     |            |            |       |       |       |       |       |       |       |
| 27                                     |            |            |       |       |       |       |       |       |       |

GraphPad Prism 7.00 - [Object in 统计图]

| 7 Unpaired t test                      |                       |  |
|----------------------------------------|-----------------------|--|
| 8 P value                              | 0.0342                |  |
| 9 P value summary                      | *                     |  |
| 10 Significantly different (P < 0.05)? | Yes                   |  |
| 11 One- or two-tailed P value?         | Two-tailed            |  |
| 12 t, df                               | t=2.55 df=8           |  |
| 13                                     |                       |  |
| 14 How big is the difference?          |                       |  |
| 15 Mean ± SEM of column A              | 1 ± 0.09997, n=5      |  |
| 16 Mean ± SEM of column B              | 0.6601 ± 0.08816, n=5 |  |
| 17 Difference between means            | -0.3399 ± 0.1333      |  |
| 18 95% confidence interval             | -0.6473 to -0.03255   |  |
| 19 R squared (eta squared)             | 0.4484                |  |
| 20                                     |                       |  |
| 21 F test to compare variances         |                       |  |
| 22 F, DFn, Dfd                         | 1.286, 4, 4           |  |
| 23 P value                             | 0.8133                |  |
| 24 P value summary                     | ns                    |  |
| 25 Significantly different (P < 0.05)? | No                    |  |
| 26                                     |                       |  |
| 27                                     |                       |  |

Figure 1D

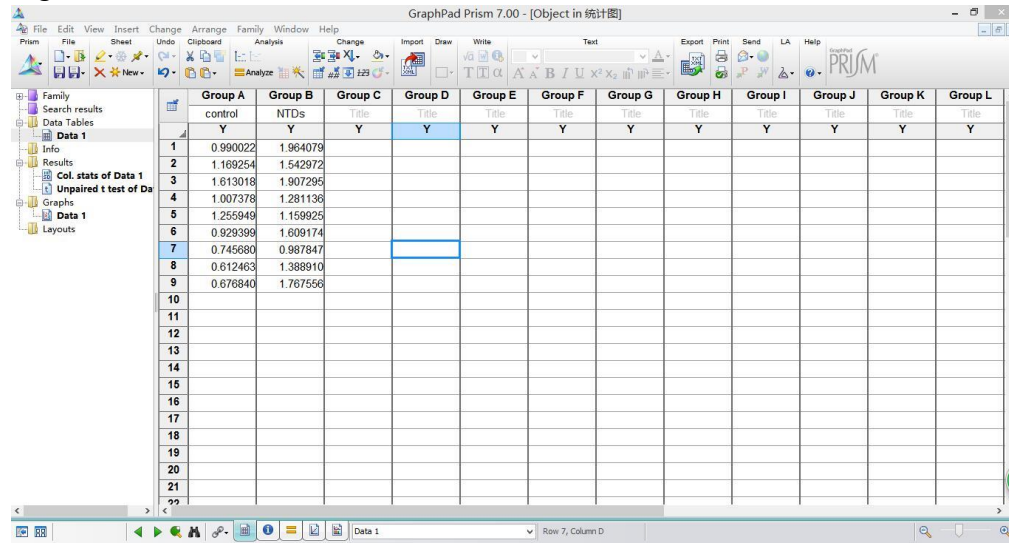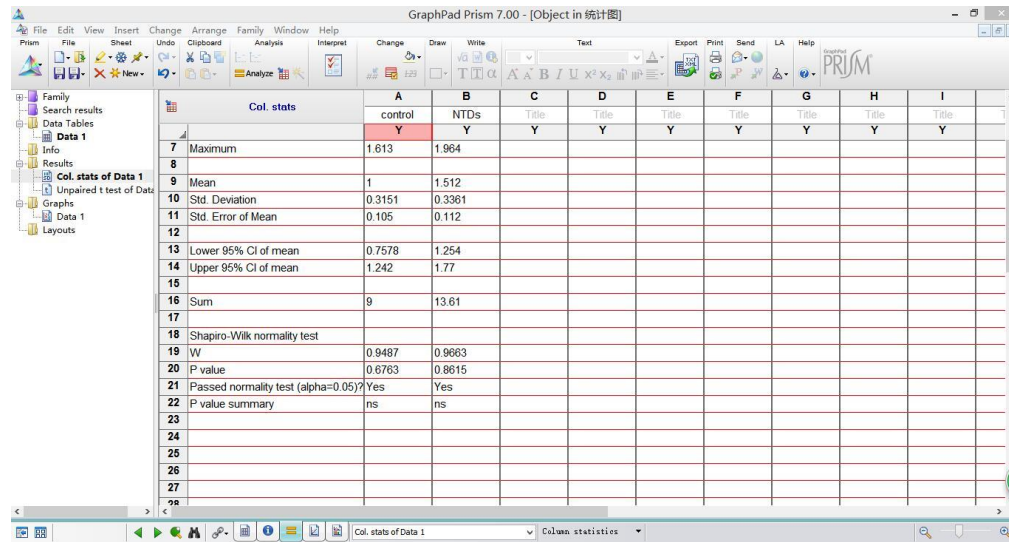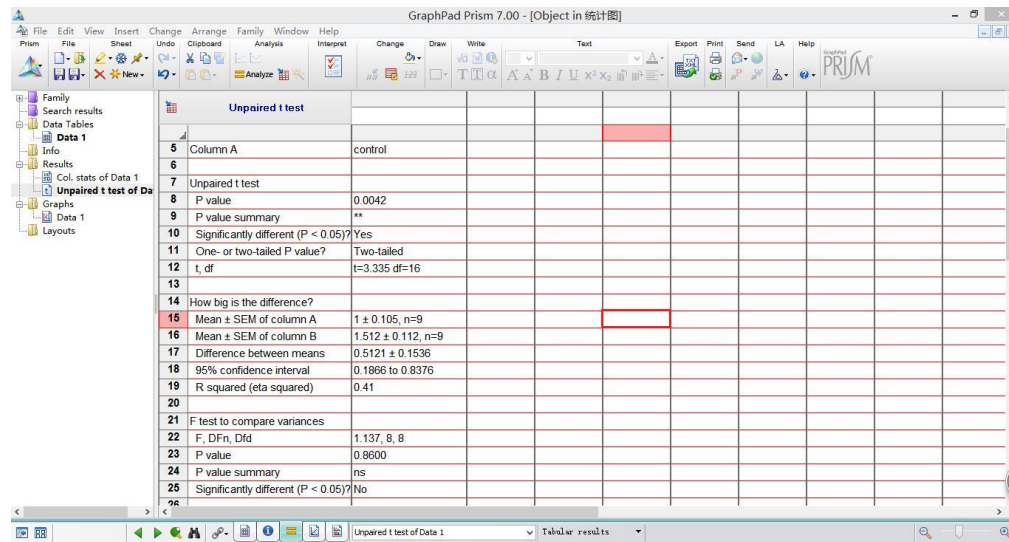

Figure 1E

GraphPad Prism 7.00 - [Project1:Data 1]

|    | Group A | Group B | Group C | Group D | Group E | Group F | Group G | Group H | Group I | Group J | Group K | Group L |
|----|---------|---------|---------|---------|---------|---------|---------|---------|---------|---------|---------|---------|
|    | control | NTDs    | Title   | Title   | Title   | Title   | Title   | Title   | Title   | Title   | Title   | Title   |
| 1  | Y       | Y       | Y       | Y       | Y       | Y       | Y       | Y       | Y       | Y       | Y       | Y       |
| 2  |         |         |         |         |         |         |         |         |         |         |         |         |
| 3  |         |         |         |         |         |         |         |         |         |         |         |         |
| 4  |         |         |         |         |         |         |         |         |         |         |         |         |
| 5  |         |         |         |         |         |         |         |         |         |         |         |         |
| 6  |         |         |         |         |         |         |         |         |         |         |         |         |
| 7  |         |         |         |         |         |         |         |         |         |         |         |         |
| 8  |         |         |         |         |         |         |         |         |         |         |         |         |
| 9  |         |         |         |         |         |         |         |         |         |         |         |         |
| 10 |         |         |         |         |         |         |         |         |         |         |         |         |
| 11 |         |         |         |         |         |         |         |         |         |         |         |         |
| 12 |         |         |         |         |         |         |         |         |         |         |         |         |
| 13 |         |         |         |         |         |         |         |         |         |         |         |         |
| 14 |         |         |         |         |         |         |         |         |         |         |         |         |
| 15 |         |         |         |         |         |         |         |         |         |         |         |         |
| 16 |         |         |         |         |         |         |         |         |         |         |         |         |
| 17 |         |         |         |         |         |         |         |         |         |         |         |         |
| 18 |         |         |         |         |         |         |         |         |         |         |         |         |
| 19 |         |         |         |         |         |         |         |         |         |         |         |         |
| 20 |         |         |         |         |         |         |         |         |         |         |         |         |
| 21 |         |         |         |         |         |         |         |         |         |         |         |         |
| 22 |         |         |         |         |         |         |         |         |         |         |         |         |

GraphPad Prism 7.00 - [Project1:Col. stats of Data 1]

| Col. stats | A                                   | B      | C      | D     | E     | F     | G     | H     | I     |
|------------|-------------------------------------|--------|--------|-------|-------|-------|-------|-------|-------|
|            | control                             | NTDs   | Title  | Title | Title | Title | Title | Title | Title |
| 4          | Y                                   | Y      | Y      | Y     | Y     | Y     | Y     | Y     | Y     |
| 5          | 25% Percentile                      | 1.75   | 3      |       |       |       |       |       |       |
| 6          | Median                              | 2.5    | 4      |       |       |       |       |       |       |
| 7          | 75% Percentile                      | 3      | 4.5    |       |       |       |       |       |       |
| 8          | Maximum                             | 4      | 6      |       |       |       |       |       |       |
| 9          | Mean                                | 2.4    | 4      |       |       |       |       |       |       |
| 10         | Std. Deviation                      | 0.9661 | 1.247  |       |       |       |       |       |       |
| 11         | Std. Error of Mean                  | 0.3055 | 0.3944 |       |       |       |       |       |       |
| 12         |                                     |        |        |       |       |       |       |       |       |
| 13         | Lower 95% CI of mean                | 1.709  | 3.108  |       |       |       |       |       |       |
| 14         | Upper 95% CI of mean                | 3.081  | 4.892  |       |       |       |       |       |       |
| 15         |                                     |        |        |       |       |       |       |       |       |
| 16         | Sum                                 | 24     | 40     |       |       |       |       |       |       |
| 17         |                                     |        |        |       |       |       |       |       |       |
| 18         | Shapiro-Wilk normality test         |        |        |       |       |       |       |       |       |
| 19         | W                                   | 0.9044 | 0.8731 |       |       |       |       |       |       |
| 20         | P value                             | 0.2449 | 0.1085 |       |       |       |       |       |       |
| 21         | Passed normality test (alpha=0.05)? | Yes    | Yes    |       |       |       |       |       |       |
| 22         | P value summary                     | ns     | ns     |       |       |       |       |       |       |
| 23         |                                     |        |        |       |       |       |       |       |       |
| 24         |                                     |        |        |       |       |       |       |       |       |

GraphPad Prism 7.00 - [Project1:Unpaired t test of Data 1]

| Unpaired t test |                                     |                    |  |
|-----------------|-------------------------------------|--------------------|--|
| 5               | Column A                            | control            |  |
| 6               |                                     |                    |  |
| 7               | Unpaired t test                     |                    |  |
| 8               | P value                             | 0.0049             |  |
| 9               | P value summary                     | **                 |  |
| 10              | Significantly different (P < 0.05)? | Yes                |  |
| 11              | One- or two-tailed P value?         | Two-tailed         |  |
| 12              | t, df                               | t=3.207 df=18      |  |
| 13              |                                     |                    |  |
| 14              | How big is the difference?          |                    |  |
| 15              | Mean ± SEM of column A              | 2.4 ± 0.3055, n=10 |  |
| 16              | Mean ± SEM of column B              | 4 ± 0.3944, n=10   |  |
| 17              | Difference between means            | 1.6 ± 0.4989       |  |
| 18              | 95% confidence interval             | 0.5519 to 2.648    |  |
| 19              | R squared (eta squared)             | 0.3636             |  |
| 20              |                                     |                    |  |
| 21              | F test to compare variances         |                    |  |
| 22              | F, DFn, Dfd                         | 1.667, 9, 9        |  |
| 23              | P value                             | 0.4584             |  |
| 24              | P value summary                     | ns                 |  |
| 25              | Significantly different (P < 0.05)? | No                 |  |

Figure 1F

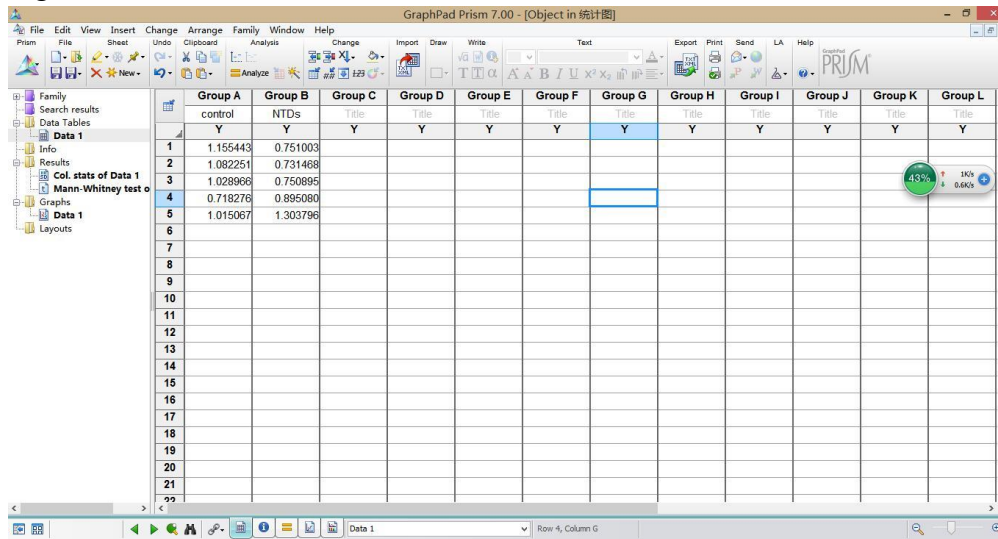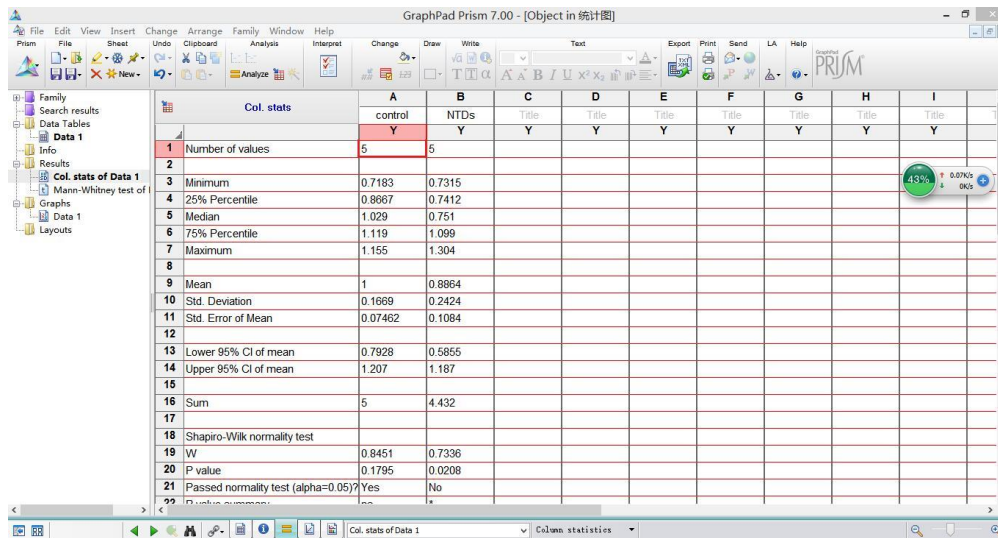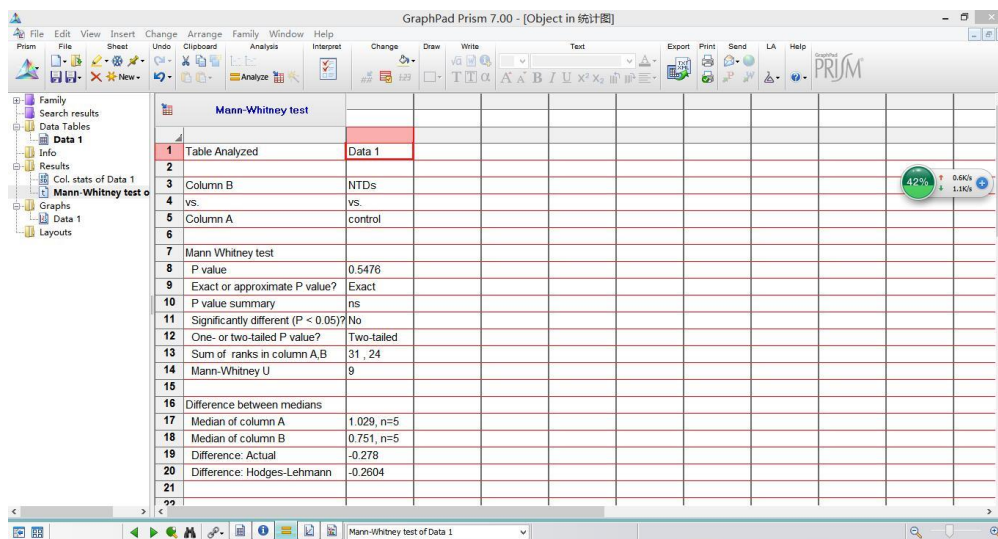



Figure 1G  
Relative fluorescence intensity:

GraphPad Prism 7.00 - [Object in 统计图]

|    | Group A  | Group B  | Group C | Group D | Group E | Group F | Group G | Group H | Group I | Group J | Group K | Group L |
|----|----------|----------|---------|---------|---------|---------|---------|---------|---------|---------|---------|---------|
|    | control  | NTDs     | Title   | Title   | Title   | Title   | Title   | Title   | Title   | Title   | Title   | Title   |
| 1  | Y        | Y        | Y       | Y       | Y       | Y       | Y       | Y       | Y       | Y       | Y       | Y       |
| 2  | 1.002426 | 1.718315 |         |         |         |         |         |         |         |         |         |         |
| 3  | 1.024257 | 2.300486 |         |         |         |         |         |         |         |         |         |         |
| 4  | 0.973317 | 2.093997 |         |         |         |         |         |         |         |         |         |         |
| 5  |          |          |         |         |         |         |         |         |         |         |         |         |
| 6  |          |          |         |         |         |         |         |         |         |         |         |         |
| 7  |          |          |         |         |         |         |         |         |         |         |         |         |
| 8  |          |          |         |         |         |         |         |         |         |         |         |         |
| 9  |          |          |         |         |         |         |         |         |         |         |         |         |
| 10 |          |          |         |         |         |         |         |         |         |         |         |         |
| 11 |          |          |         |         |         |         |         |         |         |         |         |         |
| 12 |          |          |         |         |         |         |         |         |         |         |         |         |
| 13 |          |          |         |         |         |         |         |         |         |         |         |         |
| 14 |          |          |         |         |         |         |         |         |         |         |         |         |
| 15 |          |          |         |         |         |         |         |         |         |         |         |         |
| 16 |          |          |         |         |         |         |         |         |         |         |         |         |
| 17 |          |          |         |         |         |         |         |         |         |         |         |         |
| 18 |          |          |         |         |         |         |         |         |         |         |         |         |
| 19 |          |          |         |         |         |         |         |         |         |         |         |         |
| 20 |          |          |         |         |         |         |         |         |         |         |         |         |
| 21 |          |          |         |         |         |         |         |         |         |         |         |         |
| 22 |          |          |         |         |         |         |         |         |         |         |         |         |

GraphPad Prism 7.00 - [Object in 统计图]

| Col. stats | A                                   | B       | C      | D     | E     | F     | G     | H     | I     |
|------------|-------------------------------------|---------|--------|-------|-------|-------|-------|-------|-------|
|            | control                             | NTDs    | Title  | Title | Title | Title | Title | Title | Title |
| 2          | Y                                   | Y       | Y      | Y     | Y     | Y     | Y     | Y     | Y     |
| 3          | Minimum                             | 0.9733  | 1.718  |       |       |       |       |       |       |
| 4          | 25% Percentile                      | 0.9733  | 1.718  |       |       |       |       |       |       |
| 5          | Median                              | 1.002   | 2.094  |       |       |       |       |       |       |
| 6          | 75% Percentile                      | 1.024   | 2.3    |       |       |       |       |       |       |
| 7          | Maximum                             | 1.024   | 2.3    |       |       |       |       |       |       |
| 8          |                                     |         |        |       |       |       |       |       |       |
| 9          | Mean                                | 1       | 2.038  |       |       |       |       |       |       |
| 10         | Std. Deviation                      | 0.02556 | 0.2952 |       |       |       |       |       |       |
| 11         | Std. Error of Mean                  | 0.01476 | 0.1704 |       |       |       |       |       |       |
| 12         |                                     |         |        |       |       |       |       |       |       |
| 13         | Lower 95% CI of mean                | 0.9365  | 1.304  |       |       |       |       |       |       |
| 14         | Upper 95% CI of mean                | 1.063   | 2.771  |       |       |       |       |       |       |
| 15         |                                     |         |        |       |       |       |       |       |       |
| 16         | Sum                                 | 3       | 6.113  |       |       |       |       |       |       |
| 17         |                                     |         |        |       |       |       |       |       |       |
| 18         | Shapiro-Wilk normality test         |         |        |       |       |       |       |       |       |
| 19         | W                                   | 0.9932  | 0.9726 |       |       |       |       |       |       |
| 20         | P value                             | 0.8428  | 0.6825 |       |       |       |       |       |       |
| 21         | Passed normality test (alpha=0.05)? | Yes     | Yes    |       |       |       |       |       |       |
| 22         | P value summary                     | ns      | ns     |       |       |       |       |       |       |

GraphPad Prism 7.00 - [Object in 统计图]

| Welch's t test |                                         |
|----------------|-----------------------------------------|
| 6              |                                         |
| 7              | Unpaired t test with Welch's correction |
| 8              | P value                                 |
| 9              | P value summary                         |
| 10             | Significantly different (P < 0.05)?     |
| 11             | One- or two-tailed P value?             |
| 12             | Welch-corrected t, df                   |
| 13             |                                         |
| 14             | How big is the difference?              |
| 15             | Mean ± SEM of column A                  |
| 16             | Mean ± SEM of column B                  |
| 17             | Difference between means                |
| 18             | 95% confidence interval                 |
| 19             | R squared (eta squared)                 |
| 20             |                                         |
| 21             | F test to compare variances             |
| 22             | F, DFn, Dfd                             |
| 23             | P value                                 |
| 24             | P value summary                         |
| 25             | Significantly different (P < 0.05)?     |
| 26             |                                         |



# TUNEL signal

GraphPad Prism 7.00 - [Object in 统计图]

|    | Group A | Group B | Group C | Group D | Group E | Group F | Group G | Group H | Group I | Group J | Group K | Group L |
|----|---------|---------|---------|---------|---------|---------|---------|---------|---------|---------|---------|---------|
|    | control | NTDs    | Title   | Title   | Title   | Title   | Title   | Title   | Title   | Title   | Title   | Title   |
| 1  | Y       | Y       | Y       | Y       | Y       | Y       | Y       | Y       | Y       | Y       | Y       | Y       |
| 2  | 3.921   | 38.793  |         |         |         |         |         |         |         |         |         |         |
| 3  | 4.827   | 33.333  |         |         |         |         |         |         |         |         |         |         |
| 4  | 1.724   | 28.880  |         |         |         |         |         |         |         |         |         |         |
| 5  |         |         |         |         |         |         |         |         |         |         |         |         |
| 6  |         |         |         |         |         |         |         |         |         |         |         |         |
| 7  |         |         |         |         |         |         |         |         |         |         |         |         |
| 8  |         |         |         |         |         |         |         |         |         |         |         |         |
| 9  |         |         |         |         |         |         |         |         |         |         |         |         |
| 10 |         |         |         |         |         |         |         |         |         |         |         |         |
| 11 |         |         |         |         |         |         |         |         |         |         |         |         |
| 12 |         |         |         |         |         |         |         |         |         |         |         |         |
| 13 |         |         |         |         |         |         |         |         |         |         |         |         |
| 14 |         |         |         |         |         |         |         |         |         |         |         |         |
| 15 |         |         |         |         |         |         |         |         |         |         |         |         |
| 16 |         |         |         |         |         |         |         |         |         |         |         |         |
| 17 |         |         |         |         |         |         |         |         |         |         |         |         |
| 18 |         |         |         |         |         |         |         |         |         |         |         |         |
| 19 |         |         |         |         |         |         |         |         |         |         |         |         |
| 20 |         |         |         |         |         |         |         |         |         |         |         |         |
| 21 |         |         |         |         |         |         |         |         |         |         |         |         |
| 22 |         |         |         |         |         |         |         |         |         |         |         |         |

Row 9, Column F

GraphPad Prism 7.00 - [Object in 统计图]

|    | Col. stats                          | A       | B      | C     | D     | E     | F     | G     | H     | I     |
|----|-------------------------------------|---------|--------|-------|-------|-------|-------|-------|-------|-------|
|    |                                     | control | NTDs   | Title | Title | Title | Title | Title | Title | Title |
| 2  |                                     | Y       | Y      | Y     | Y     | Y     | Y     | Y     | Y     | Y     |
| 3  | Minimum                             | 1.724   | 28.88  |       |       |       |       |       |       |       |
| 4  | 25% Percentile                      | 1.724   | 28.88  |       |       |       |       |       |       |       |
| 5  | Median                              | 3.921   | 33.33  |       |       |       |       |       |       |       |
| 6  | 75% Percentile                      | 4.827   | 38.79  |       |       |       |       |       |       |       |
| 7  | Maximum                             | 4.827   | 38.79  |       |       |       |       |       |       |       |
| 8  |                                     |         |        |       |       |       |       |       |       |       |
| 9  | Mean                                | 3.491   | 33.67  |       |       |       |       |       |       |       |
| 10 | Std. Deviation                      | 1.596   | 4.965  |       |       |       |       |       |       |       |
| 11 | Std. Error of Mean                  | 0.9212  | 2.867  |       |       |       |       |       |       |       |
| 12 |                                     |         |        |       |       |       |       |       |       |       |
| 13 | Lower 95% CI of mean                | -0.4731 | 21.33  |       |       |       |       |       |       |       |
| 14 | Upper 95% CI of mean                | 7.454   | 46     |       |       |       |       |       |       |       |
| 15 |                                     |         |        |       |       |       |       |       |       |       |
| 16 | Sum                                 | 10.47   | 101    |       |       |       |       |       |       |       |
| 17 |                                     |         |        |       |       |       |       |       |       |       |
| 18 | Shapiro-Wilk normality test         |         |        |       |       |       |       |       |       |       |
| 19 | W                                   | 0.9454  | 0.9966 |       |       |       |       |       |       |       |
| 20 | P value                             | 0.5498  | 0.8881 |       |       |       |       |       |       |       |
| 21 | Passed normality test (alpha=0.05)? | Yes     | Yes    |       |       |       |       |       |       |       |
| 22 | P value summary                     | ns      | ns     |       |       |       |       |       |       |       |

Col. stats of Data 1

GraphPad Prism 7.00 - [Object in 统计图]

|    | Unpaired t test                     |                     |  |  |  |  |  |  |  |  |
|----|-------------------------------------|---------------------|--|--|--|--|--|--|--|--|
| 7  | Unpaired t test                     |                     |  |  |  |  |  |  |  |  |
| 8  | P value                             | 0.0006              |  |  |  |  |  |  |  |  |
| 9  | P value summary                     | ***                 |  |  |  |  |  |  |  |  |
| 10 | Significantly different (P < 0.05)? | Yes                 |  |  |  |  |  |  |  |  |
| 11 | One- or two-tailed P value?         | Two-tailed          |  |  |  |  |  |  |  |  |
| 12 | t, df                               | t=10.02 df=4        |  |  |  |  |  |  |  |  |
| 13 |                                     |                     |  |  |  |  |  |  |  |  |
| 14 | How big is the difference?          |                     |  |  |  |  |  |  |  |  |
| 15 | Mean ± SEM of column A              | 3.491 ± 0.9212, n=3 |  |  |  |  |  |  |  |  |
| 16 | Mean ± SEM of column B              | 33.67 ± 2.867, n=3  |  |  |  |  |  |  |  |  |
| 17 | Difference between means            | 30.18 ± 3.011       |  |  |  |  |  |  |  |  |
| 18 | 95% confidence interval             | 21.82 to 38.54      |  |  |  |  |  |  |  |  |
| 19 | R squared (eta squared)             | 0.9617              |  |  |  |  |  |  |  |  |
| 20 |                                     |                     |  |  |  |  |  |  |  |  |
| 21 | F test to compare variances         |                     |  |  |  |  |  |  |  |  |
| 22 | F, DFn, Dfd                         | 9.682, 2, 2         |  |  |  |  |  |  |  |  |
| 23 | P value                             | 0.1872              |  |  |  |  |  |  |  |  |
| 24 | P value summary                     | ns                  |  |  |  |  |  |  |  |  |
| 25 | Significantly different (P < 0.05)? | No                  |  |  |  |  |  |  |  |  |
| 26 |                                     |                     |  |  |  |  |  |  |  |  |
| 27 |                                     |                     |  |  |  |  |  |  |  |  |
| 28 |                                     |                     |  |  |  |  |  |  |  |  |

Unpaired t test of Data 1

Tabular results

Figure 2B

GraphPad Prism 7.00 - [Project:Data 1]

|    | Group A  | Group B     | Group C | Group D | Group E | Group F | Group G | Group H | Group I | Group J | Group K | Group L |
|----|----------|-------------|---------|---------|---------|---------|---------|---------|---------|---------|---------|---------|
|    | Bio-con  | Bio-miR-322 |         |         |         |         |         |         |         |         |         |         |
|    | Y        | Y           | Y       | Y       | Y       | Y       | Y       | Y       | Y       | Y       | Y       | Y       |
| 1  | 1.000000 | 211.3868    |         |         |         |         |         |         |         |         |         |         |
| 2  | 0.915650 | 205.8429    |         |         |         |         |         |         |         |         |         |         |
| 3  | 0.934827 | 188.4187    |         |         |         |         |         |         |         |         |         |         |
| 4  |          |             |         |         |         |         |         |         |         |         |         |         |
| 5  |          |             |         |         |         |         |         |         |         |         |         |         |
| 6  |          |             |         |         |         |         |         |         |         |         |         |         |
| 7  |          |             |         |         |         |         |         |         |         |         |         |         |
| 8  |          |             |         |         |         |         |         |         |         |         |         |         |
| 9  |          |             |         |         |         |         |         |         |         |         |         |         |
| 10 |          |             |         |         |         |         |         |         |         |         |         |         |
| 11 |          |             |         |         |         |         |         |         |         |         |         |         |
| 12 |          |             |         |         |         |         |         |         |         |         |         |         |
| 13 |          |             |         |         |         |         |         |         |         |         |         |         |
| 14 |          |             |         |         |         |         |         |         |         |         |         |         |
| 15 |          |             |         |         |         |         |         |         |         |         |         |         |
| 16 |          |             |         |         |         |         |         |         |         |         |         |         |
| 17 |          |             |         |         |         |         |         |         |         |         |         |         |
| 18 |          |             |         |         |         |         |         |         |         |         |         |         |
| 19 |          |             |         |         |         |         |         |         |         |         |         |         |
| 20 |          |             |         |         |         |         |         |         |         |         |         |         |
| 21 |          |             |         |         |         |         |         |         |         |         |         |         |
| 22 |          |             |         |         |         |         |         |         |         |         |         |         |

GraphPad Prism 7.00 - [Project:Col. stats of Data 1]

| Col. stats                             | A       | B           | C | D | E | F | G | H | I |
|----------------------------------------|---------|-------------|---|---|---|---|---|---|---|
|                                        | Bio-con | Bio-miR-322 |   |   |   |   |   |   |   |
|                                        | Y       | Y           | Y | Y | Y | Y | Y | Y | Y |
| 7 Maximum                              | 1       | 211.4       |   |   |   |   |   |   |   |
| 8 Mean                                 | 0.9502  | 201.9       |   |   |   |   |   |   |   |
| 9 Std. Deviation                       | 0.04422 | 11.99       |   |   |   |   |   |   |   |
| 10 Std. Error of Mean                  | 0.02553 | 6.92        |   |   |   |   |   |   |   |
| 11 Lower 95% CI of mean                | 0.8403  | 172.1       |   |   |   |   |   |   |   |
| 12 Upper 95% CI of mean                | 1.06    | 231.7       |   |   |   |   |   |   |   |
| 13 Sum                                 | 2.85    | 605.6       |   |   |   |   |   |   |   |
| 14 Shapiro-Wilk normality test         |         |             |   |   |   |   |   |   |   |
| 15 W                                   | 0.9098  | 0.9181      |   |   |   |   |   |   |   |
| 16 P value                             | 0.4175  | 0.4457      |   |   |   |   |   |   |   |
| 17 Passed normality test (alpha=0.05)? | Yes     | Yes         |   |   |   |   |   |   |   |
| 18 P value summary                     | ns      | ns          |   |   |   |   |   |   |   |

GraphPad Prism 7.00 - [Object in 统计图]

| Welch's t test                            |                       |
|-------------------------------------------|-----------------------|
| 7 Unpaired t test with Welch's correction |                       |
| 8 P value                                 | 0.0012                |
| 9 P value summary                         | **                    |
| 10 Significantly different (P < 0.05)?    | Yes                   |
| 11 One- or two-tailed P value?            | Two-tailed            |
| 12 Welch-corrected t, df                  | t=29.04 df=2          |
| 13                                        |                       |
| 14 How big is the difference?             |                       |
| 15 Mean ± SEM of column A                 | 0.9502 ± 0.02553, n=3 |
| 16 Mean ± SEM of column B                 | 201.9 ± 6.92, n=3     |
| 17 Difference between means               | 200.9 ± 6.92          |
| 18 95% confidence interval                | 171.2 to 230.7        |
| 19 R squared (eta squared)                | 0.9976                |
| 20                                        |                       |
| 21 F test to compare variances            |                       |
| 22 F, DFn, Dfd                            | 73475, 2, 2           |
| 23 P value                                | <0.0001               |
| 24 P value summary                        | ****                  |
| 25 Significantly different (P < 0.05)?    | Yes                   |

Figure 2C

GraphPad Prism 7.00 - [Object in 统计图]

|    | Group A  | Group B  | Group C | Group D | Group E | Group F | Group G | Group H | Group I | Group J | Group K | Group L |
|----|----------|----------|---------|---------|---------|---------|---------|---------|---------|---------|---------|---------|
| 1  | 1.000000 | 0.958027 |         | Y       | Y       | Y       | Y       | Y       | Y       | Y       | Y       | Y       |
| 2  | 0.997562 | 1.055409 |         |         |         |         |         |         |         |         |         |         |
| 3  | 0.987160 | 1.159709 |         |         |         |         |         |         |         |         |         |         |
| 4  |          |          |         |         |         |         |         |         |         |         |         |         |
| 5  |          |          |         |         |         |         |         |         |         |         |         |         |
| 6  |          |          |         |         |         |         |         |         |         |         |         |         |
| 7  |          |          |         |         |         |         |         |         |         |         |         |         |
| 8  |          |          |         |         |         |         |         |         |         |         |         |         |
| 9  |          |          |         |         |         |         |         |         |         |         |         |         |
| 10 |          |          |         |         |         |         |         |         |         |         |         |         |
| 11 |          |          |         |         |         |         |         |         |         |         |         |         |
| 12 |          |          |         |         |         |         |         |         |         |         |         |         |
| 13 |          |          |         |         |         |         |         |         |         |         |         |         |
| 14 |          |          |         |         |         |         |         |         |         |         |         |         |
| 15 |          |          |         |         |         |         |         |         |         |         |         |         |
| 16 |          |          |         |         |         |         |         |         |         |         |         |         |
| 17 |          |          |         |         |         |         |         |         |         |         |         |         |
| 18 |          |          |         |         |         |         |         |         |         |         |         |         |
| 19 |          |          |         |         |         |         |         |         |         |         |         |         |
| 20 |          |          |         |         |         |         |         |         |         |         |         |         |
| 21 |          |          |         |         |         |         |         |         |         |         |         |         |
| 22 |          |          |         |         |         |         |         |         |         |         |         |         |

Unpaired t test data Row 7, Column D

GraphPad Prism 7.00 - [Object in 统计图]

|    | Col. stats                          | A        | B       | C | D | E | F | G | H | I |
|----|-------------------------------------|----------|---------|---|---|---|---|---|---|---|
| 7  | Maximum                             | 1        | 1.16    |   |   |   |   |   |   |   |
| 9  | Mean                                | 0.9949   | 1.058   |   |   |   |   |   |   |   |
| 10 | Std. Deviation                      | 0.006819 | 0.1009  |   |   |   |   |   |   |   |
| 11 | Std. Error of Mean                  | 0.003937 | 0.05823 |   |   |   |   |   |   |   |
| 13 | Lower 95% CI of mean                | 0.978    | 0.8072  |   |   |   |   |   |   |   |
| 14 | Upper 95% CI of mean                | 1.012    | 1.308   |   |   |   |   |   |   |   |
| 16 | Sum                                 | 2.985    | 3.173   |   |   |   |   |   |   |   |
| 18 | Shapiro-Wilk normality test         |          |         |   |   |   |   |   |   |   |
| 19 | W                                   | 0.8863   | 0.9996  |   |   |   |   |   |   |   |
| 20 | P value                             | 0.3432   | 0.9622  |   |   |   |   |   |   |   |
| 21 | Passed normality test (alpha=0.05)? | Yes      | Yes     |   |   |   |   |   |   |   |
| 22 | P value summary                     | ns       | ns      |   |   |   |   |   |   |   |

Col. stats of Unpaired t test data Column: statistics

GraphPad Prism 7.00 - [Object in 统计图]

|    | Welch's t test                          |                        |
|----|-----------------------------------------|------------------------|
| 6  |                                         |                        |
| 7  | Unpaired t test with Welch's correction |                        |
| 8  | P value                                 | 0.3936                 |
| 9  | P value summary                         | ns                     |
| 10 | Significantly different (P < 0.05)?     | No                     |
| 11 | One- or two-tailed P value?             | Two-tailed             |
| 12 | Welch-corrected t, df                   | t=1.076 df=2.018       |
| 14 | How big is the difference?              |                        |
| 15 | Mean ± SEM of column A                  | 0.9949 ± 0.003937, n=3 |
| 16 | Mean ± SEM of column B                  | 1.058 ± 0.05823, n=3   |
| 17 | Difference between means                | 0.06281 ± 0.05836      |
| 18 | 95% confidence interval                 | -0.1861 to 0.3118      |
| 19 | R squared (eta squared)                 | 0.3646                 |
| 21 | F test to compare variances             |                        |
| 22 | F, DFn, Dfd                             | 218.8, 2, 2            |
| 23 | P value                                 | 0.0091                 |
| 24 | P value summary                         | ***                    |
| 25 | Significantly different (P < 0.05)?     | Yes                    |

Welch's t test of Unpaired t test data Tabular results

Figure 2D

GraphPad Prism 7.00 - [Object in 统计图]

|    | Group A  | Group B     | Group C | Group D | Group E | Group F | Group G | Group H | Group I | Group J | Group K | Group L |
|----|----------|-------------|---------|---------|---------|---------|---------|---------|---------|---------|---------|---------|
|    | Bio-con  | Bio-miR-322 | Title   | Title   | Title   | Title   | Title   | Title   | Title   | Title   | Title   | Title   |
|    | Y        | Y           | Y       | Y       | Y       | Y       | Y       | Y       | Y       | Y       | Y       | Y       |
| 1  | 1.000000 | 16.73243    |         |         |         |         |         |         |         |         |         |         |
| 2  | 0.997710 | 16.92951    |         |         |         |         |         |         |         |         |         |         |
| 3  | 1.024278 | 16.77110    |         |         |         |         |         |         |         |         |         |         |
| 4  |          |             |         |         |         |         |         |         |         |         |         |         |
| 5  |          |             |         |         |         |         |         |         |         |         |         |         |
| 6  |          |             |         |         |         |         |         |         |         |         |         |         |
| 7  |          |             |         |         |         |         |         |         |         |         |         |         |
| 8  |          |             |         |         |         |         |         |         |         |         |         |         |
| 9  |          |             |         |         |         |         |         |         |         |         |         |         |
| 10 |          |             |         |         |         |         |         |         |         |         |         |         |
| 11 |          |             |         |         |         |         |         |         |         |         |         |         |
| 12 |          |             |         |         |         |         |         |         |         |         |         |         |
| 13 |          |             |         |         |         |         |         |         |         |         |         |         |
| 14 |          |             |         |         |         |         |         |         |         |         |         |         |
| 15 |          |             |         |         |         |         |         |         |         |         |         |         |
| 16 |          |             |         |         |         |         |         |         |         |         |         |         |
| 17 |          |             |         |         |         |         |         |         |         |         |         |         |
| 18 |          |             |         |         |         |         |         |         |         |         |         |         |
| 19 |          |             |         |         |         |         |         |         |         |         |         |         |
| 20 |          |             |         |         |         |         |         |         |         |         |         |         |
| 21 |          |             |         |         |         |         |         |         |         |         |         |         |
| 22 |          |             |         |         |         |         |         |         |         |         |         |         |

Unpaired t test data

GraphPad Prism 7.00 - [Object in 统计图]

|    | A                                   | B           | C       | D     | E     | F     | G     | H     | I     |
|----|-------------------------------------|-------------|---------|-------|-------|-------|-------|-------|-------|
|    | Bio-con                             | Bio-miR-322 | Title   | Title | Title | Title | Title | Title | Title |
|    | Y                                   | Y           | Y       | Y     | Y     | Y     | Y     | Y     | Y     |
| 1  | Number of values                    | 3           | 3       |       |       |       |       |       |       |
| 2  |                                     |             |         |       |       |       |       |       |       |
| 3  | Minimum                             | 0.9977      | 16.73   |       |       |       |       |       |       |
| 4  | 25% Percentile                      | 0.9977      | 16.73   |       |       |       |       |       |       |
| 5  | Median                              | 1           | 16.77   |       |       |       |       |       |       |
| 6  | 75% Percentile                      | 1.024       | 16.93   |       |       |       |       |       |       |
| 7  | Maximum                             | 1.024       | 16.93   |       |       |       |       |       |       |
| 8  |                                     |             |         |       |       |       |       |       |       |
| 9  | Mean                                | 1.007       | 16.81   |       |       |       |       |       |       |
| 10 | Std. Deviation                      | 0.01472     | 0.1044  |       |       |       |       |       |       |
| 11 | Std. Error of Mean                  | 0.0085      | 0.06029 |       |       |       |       |       |       |
| 12 |                                     |             |         |       |       |       |       |       |       |
| 13 | Lower 95% CI of mean                | 0.9708      | 16.55   |       |       |       |       |       |       |
| 14 | Upper 95% CI of mean                | 1.044       | 17.07   |       |       |       |       |       |       |
| 15 |                                     |             |         |       |       |       |       |       |       |
| 16 | Sum                                 | 3.022       | 50.43   |       |       |       |       |       |       |
| 17 |                                     |             |         |       |       |       |       |       |       |
| 18 | Shapiro-Wilk normality test         |             |         |       |       |       |       |       |       |
| 19 | W                                   | 0.8141      | 0.8904  |       |       |       |       |       |       |
| 20 | P value                             | 0.1487      | 0.3557  |       |       |       |       |       |       |
| 21 | Passed normality test (alpha=0.05)? | Yes         | Yes     |       |       |       |       |       |       |
| 22 |                                     |             |         |       |       |       |       |       |       |

Col. stats of Unpaired t test data

GraphPad Prism 7.00 - [Object in 统计图]

|    | A                                       | B                    | C     | D     | E     | F     | G     | H     | I     |
|----|-----------------------------------------|----------------------|-------|-------|-------|-------|-------|-------|-------|
|    | Bio-con                                 | Bio-miR-322          | Title | Title | Title | Title | Title | Title | Title |
|    | Y                                       | Y                    | Y     | Y     | Y     | Y     | Y     | Y     | Y     |
| 6  |                                         |                      |       |       |       |       |       |       |       |
| 7  | Unpaired t test with Welch's correction |                      |       |       |       |       |       |       |       |
| 8  | P value                                 | <0.0001              |       |       |       |       |       |       |       |
| 9  | P value summary                         | ****                 |       |       |       |       |       |       |       |
| 10 | Significantly different (P < 0.05)?     | Yes                  |       |       |       |       |       |       |       |
| 11 | One- or two-tailed P value?             | Two-tailed           |       |       |       |       |       |       |       |
| 12 | Welch-corrected t, df                   | t=259.6 df=2.079     |       |       |       |       |       |       |       |
| 13 |                                         |                      |       |       |       |       |       |       |       |
| 14 | How big is the difference?              |                      |       |       |       |       |       |       |       |
| 15 | Mean ± SEM of column A                  | 1.007 ± 0.0085, n=3  |       |       |       |       |       |       |       |
| 16 | Mean ± SEM of column B                  | 16.81 ± 0.06029, n=3 |       |       |       |       |       |       |       |
| 17 | Difference between means                | 15.8 ± 0.06089       |       |       |       |       |       |       |       |
| 18 | 95% confidence interval                 | 15.55 to 16.06       |       |       |       |       |       |       |       |
| 19 | R squared (eta squared)                 | 1                    |       |       |       |       |       |       |       |
| 20 |                                         |                      |       |       |       |       |       |       |       |
| 21 | F test to compare variances             |                      |       |       |       |       |       |       |       |
| 22 | F, DFn, Dfd                             | 50.31, 2, 2          |       |       |       |       |       |       |       |
| 23 | P value                                 | 0.0390               |       |       |       |       |       |       |       |
| 24 | P value summary                         | *                    |       |       |       |       |       |       |       |
| 25 | Significantly different (P < 0.05)?     | Yes                  |       |       |       |       |       |       |       |
| 26 |                                         |                      |       |       |       |       |       |       |       |

Welch's t test of Unpaired t test data





Figure 3A

GraphPad Prism 7.00 - [Project:Data 2]

| Table format |    | Group A   |           |   | Group B   |           |   | Group C |    |   | Group D |    |
|--------------|----|-----------|-----------|---|-----------|-----------|---|---------|----|---|---------|----|
| id           | ix | Mean      | SD        | N | Mean      | SD        | N | Mean    | SD | N | Mean    | SD |
| 1            |    | 100.00270 | 4.858892  | 3 | 99.97858  | 11.554890 | 3 |         |    |   |         |    |
| 2            |    | 100.00090 | 11.604810 | 3 | 45.00311  | 6.208022  | 3 |         |    |   |         |    |
| 3            |    | 99.99865  | 7.564849  | 3 | 54.08364  | 7.627031  | 3 |         |    |   |         |    |
| 4            |    | 99.99759  | 14.259430 | 3 | 101.90600 | 10.923980 | 3 |         |    |   |         |    |
| 5            |    |           |           |   |           |           |   |         |    |   |         |    |
| 6            |    |           |           |   |           |           |   |         |    |   |         |    |
| 7            |    |           |           |   |           |           |   |         |    |   |         |    |
| 8            |    |           |           |   |           |           |   |         |    |   |         |    |
| 9            |    |           |           |   |           |           |   |         |    |   |         |    |
| 10           |    |           |           |   |           |           |   |         |    |   |         |    |
| 11           |    |           |           |   |           |           |   |         |    |   |         |    |
| 12           |    |           |           |   |           |           |   |         |    |   |         |    |
| 13           |    |           |           |   |           |           |   |         |    |   |         |    |
| 14           |    |           |           |   |           |           |   |         |    |   |         |    |
| 15           |    |           |           |   |           |           |   |         |    |   |         |    |
| 16           |    |           |           |   |           |           |   |         |    |   |         |    |
| 17           |    |           |           |   |           |           |   |         |    |   |         |    |
| 18           |    |           |           |   |           |           |   |         |    |   |         |    |
| 19           |    |           |           |   |           |           |   |         |    |   |         |    |
| 20           |    |           |           |   |           |           |   |         |    |   |         |    |
| 21           |    |           |           |   |           |           |   |         |    |   |         |    |
| 22           |    |           |           |   |           |           |   |         |    |   |         |    |

GraphPad Prism 7.00 - [Project:Unpaired t test of Data 1]

| Unpaired t test |                                     |                    |  |  |
|-----------------|-------------------------------------|--------------------|--|--|
| 7               | Unpaired t test                     |                    |  |  |
| 8               | P value                             | 0.9975             |  |  |
| 9               | P value summary                     | ns                 |  |  |
| 10              | Significantly different (P < 0.05)? | No                 |  |  |
| 11              | One- or two-tailed P value?         | Two-tailed         |  |  |
| 12              | t, df                               | t=0.003333 df=4    |  |  |
| 13              |                                     |                    |  |  |
| 14              | How big is the difference?          |                    |  |  |
| 15              | Mean ± SEM of column A              | 99.98 ± 6.671, n=3 |  |  |
| 16              | Mean ± SEM of column B              | 100 ± 2.805, n=3   |  |  |
| 17              | Difference between means            | 0.02412 ± 7.237    |  |  |
| 18              | 95% confidence interval             | -20.07 to 20.12    |  |  |
| 19              | R squared (eta squared)             | 2.777e-006         |  |  |
| 20              |                                     |                    |  |  |
| 21              | F test to compare variances         |                    |  |  |
| 22              | F, DFn, Dfd                         | 5.655, 2, 2        |  |  |
| 23              | P value                             | 0.3005             |  |  |
| 24              | P value summary                     | ns                 |  |  |
| 25              | Significantly different (P < 0.05)? | No                 |  |  |
| 26              |                                     |                    |  |  |
| 27              |                                     |                    |  |  |
| 28              |                                     |                    |  |  |

GraphPad Prism 7.00 - [Project:Unpaired t test of Data 1]

| Unpaired t test |                                     |                 |  |  |
|-----------------|-------------------------------------|-----------------|--|--|
| 7               | Unpaired t test                     |                 |  |  |
| 8               | P value                             | 0.0019          |  |  |
| 9               | P value summary                     | ***             |  |  |
| 10              | Significantly different (P < 0.05)? | Yes             |  |  |
| 11              | One- or two-tailed P value?         | Two-tailed      |  |  |
| 12              | t, df                               | t=7.238 df=4    |  |  |
| 13              |                                     |                 |  |  |
| 14              | How big is the difference?          |                 |  |  |
| 15              | Mean ± SEM of column A              | 45 ± 3.684, n=3 |  |  |
| 16              | Mean ± SEM of column B              | 100 ± 6.7, n=3  |  |  |
| 17              | Difference between means            | 55 ± 7.598      |  |  |
| 18              | 95% confidence interval             | 33.9 to 76.09   |  |  |
| 19              | R squared (eta squared)             | 0.9291          |  |  |
| 20              |                                     |                 |  |  |
| 21              | F test to compare variances         |                 |  |  |
| 22              | F, DFn, Dfd                         | 3.494, 2, 2     |  |  |
| 23              | P value                             | 0.4450          |  |  |
| 24              | P value summary                     | ns              |  |  |
| 25              | Significantly different (P < 0.05)? | No              |  |  |
| 26              |                                     |                 |  |  |
| 27              |                                     |                 |  |  |
| 28              |                                     |                 |  |  |

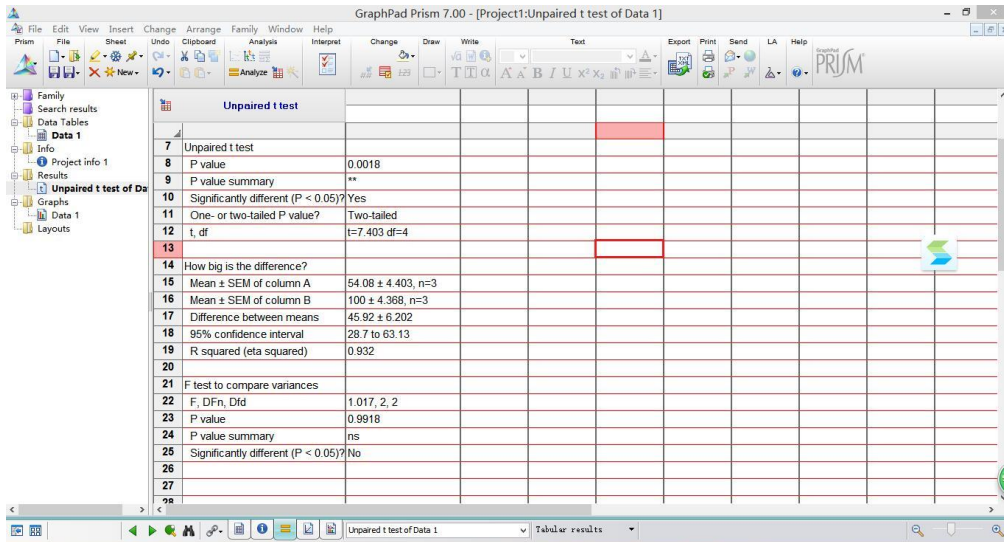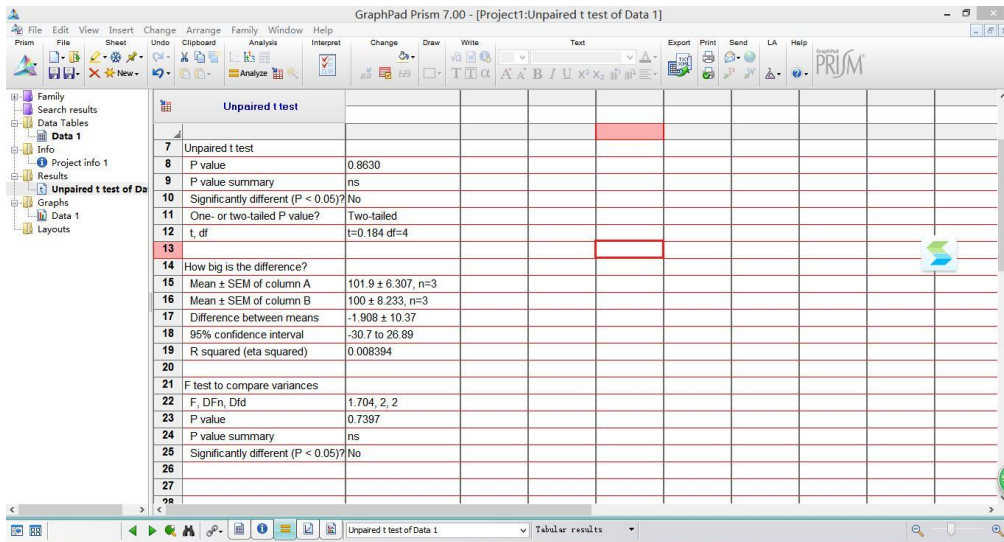

Figure 3B

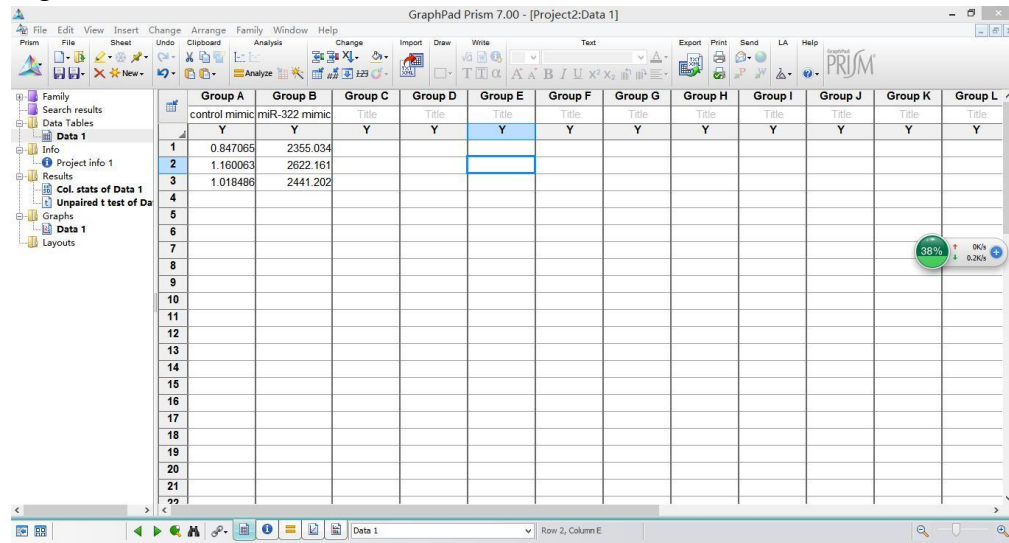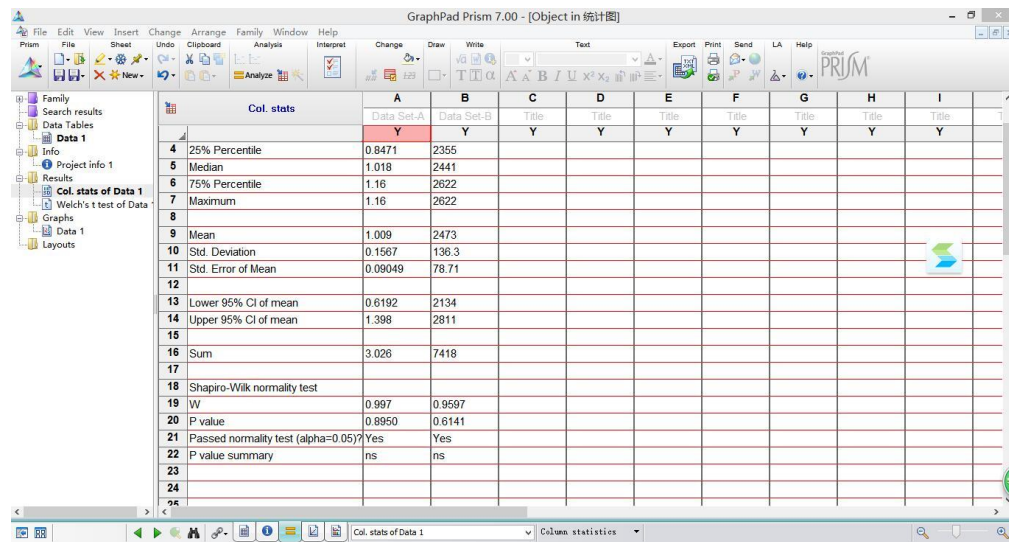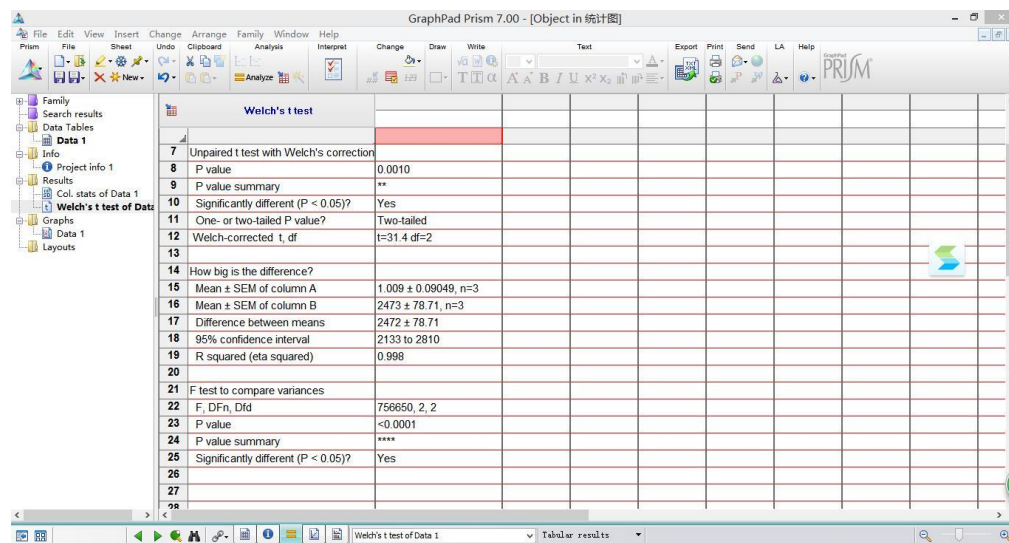



Figure 3C

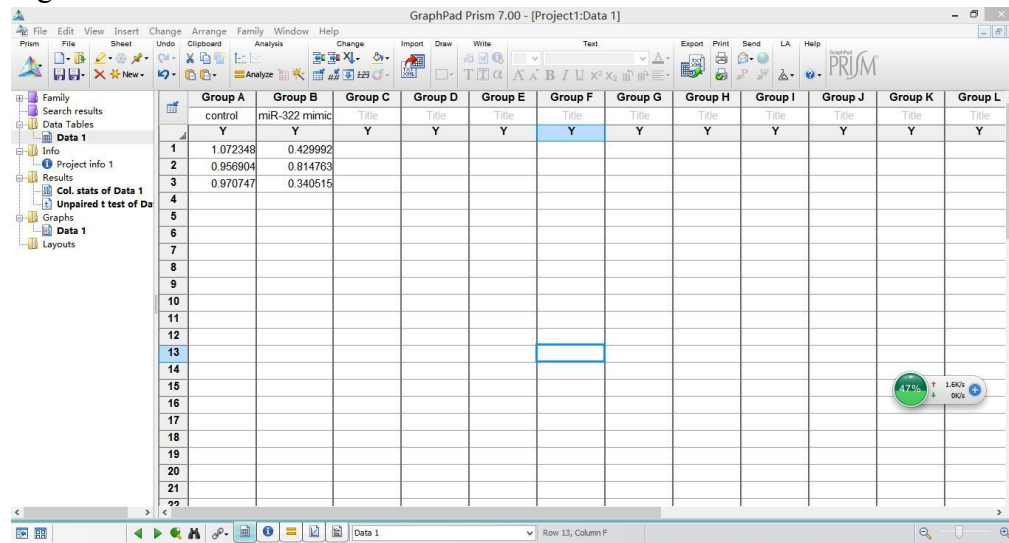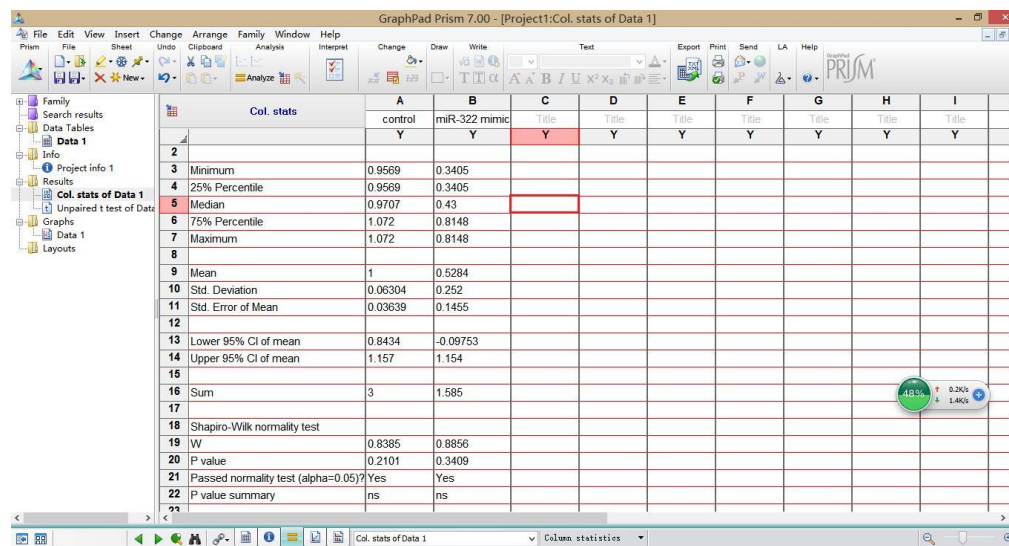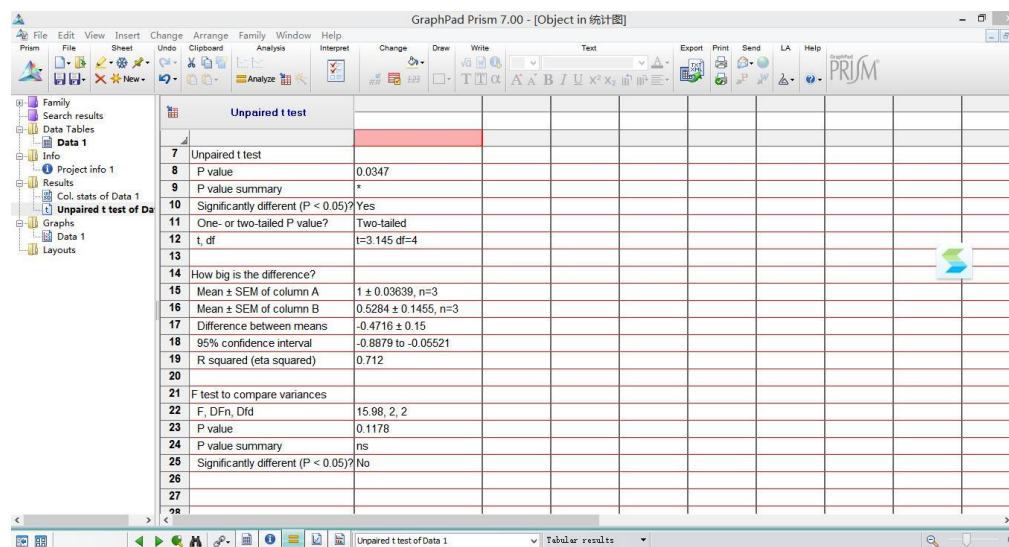

Figure 3D

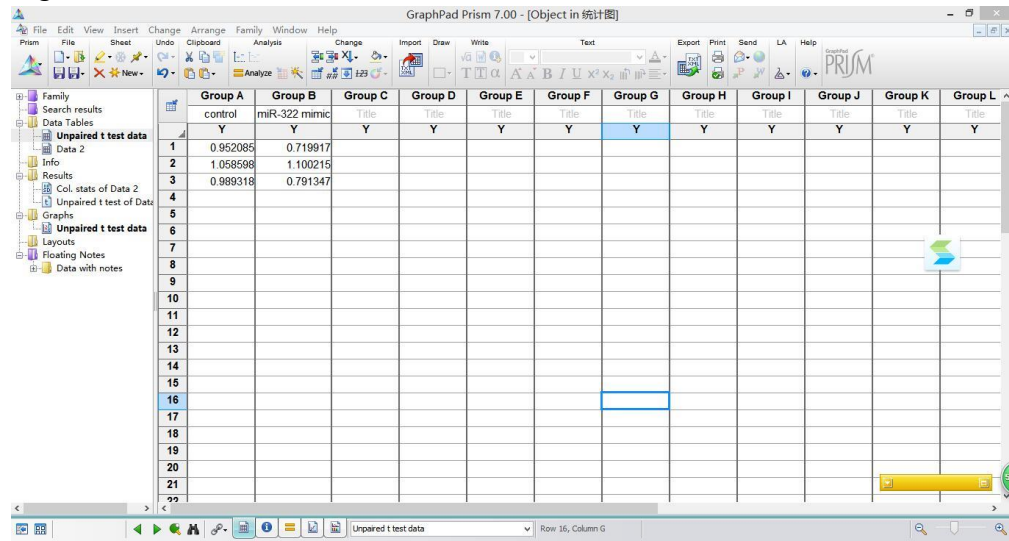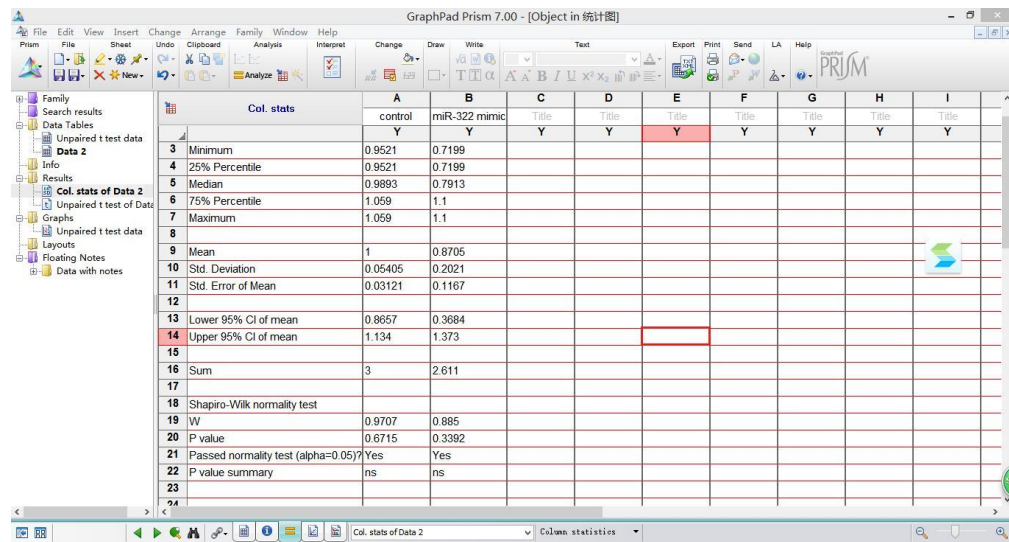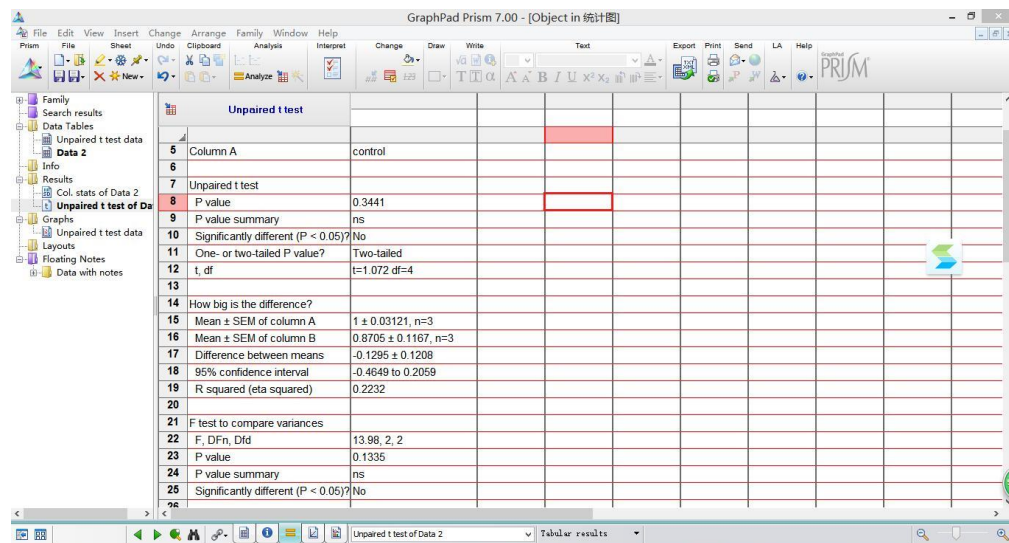

Figure 3E

GraphPad Prism 7.00 - [Object in 论文图片]

|    | Group A  | Group B           | Group C | Group D | Group E | Group F | Group G | Group H | Group I | Group J | Group K | Group L |
|----|----------|-------------------|---------|---------|---------|---------|---------|---------|---------|---------|---------|---------|
|    | control  | miR-322 inhibitor | Title   | Title   | Title   | Title   | Title   | Title   | Title   | Title   | Title   | Title   |
| 1  | Y        | Y                 | Y       | Y       | Y       | Y       | Y       | Y       | Y       | Y       | Y       | Y       |
| 2  | 0.981397 | 0.067870          |         |         |         |         |         |         |         |         |         |         |
| 3  | 1.086780 | 0.069587          |         |         |         |         |         |         |         |         |         |         |
| 4  | 0.937776 | 0.047840          |         |         |         |         |         |         |         |         |         |         |
| 5  |          |                   |         |         |         |         |         |         |         |         |         |         |
| 6  |          |                   |         |         |         |         |         |         |         |         |         |         |
| 7  |          |                   |         |         |         |         |         |         |         |         |         |         |
| 8  |          |                   |         |         |         |         |         |         |         |         |         |         |
| 9  |          |                   |         |         |         |         |         |         |         |         |         |         |
| 10 |          |                   |         |         |         |         |         |         |         |         |         |         |
| 11 |          |                   |         |         |         |         |         |         |         |         |         |         |
| 12 |          |                   |         |         |         |         |         |         |         |         |         |         |
| 13 |          |                   |         |         |         |         |         |         |         |         |         |         |
| 14 |          |                   |         |         |         |         |         |         |         |         |         |         |
| 15 |          |                   |         |         |         |         |         |         |         |         |         |         |
| 16 |          |                   |         |         |         |         |         |         |         |         |         |         |
| 17 |          |                   |         |         |         |         |         |         |         |         |         |         |
| 18 |          |                   |         |         |         |         |         |         |         |         |         |         |
| 19 |          |                   |         |         |         |         |         |         |         |         |         |         |
| 20 |          |                   |         |         |         |         |         |         |         |         |         |         |
| 21 |          |                   |         |         |         |         |         |         |         |         |         |         |
| 22 |          |                   |         |         |         |         |         |         |         |         |         |         |

Row 10, A1: control

GraphPad Prism 7.00 - [Object in 论文图片]

| Col. stats | A                                   | B                 | C       | D     | E     | F     | G     | H     | I     |
|------------|-------------------------------------|-------------------|---------|-------|-------|-------|-------|-------|-------|
|            | control                             | miR-322 inhibitor | Title   | Title | Title | Title | Title | Title | Title |
| 2          | Y                                   | Y                 | Y       | Y     | Y     | Y     | Y     | Y     | Y     |
| 3          | Minimum                             | 0.9378            | 0.04784 |       |       |       |       |       |       |
| 4          | 25% Percentile                      | 0.9378            | 0.04784 |       |       |       |       |       |       |
| 5          | Median                              | 0.9814            | 0.06787 |       |       |       |       |       |       |
| 6          | 75% Percentile                      | 1.087             | 0.06959 |       |       |       |       |       |       |
| 7          | Maximum                             | 1.087             | 0.06959 |       |       |       |       |       |       |
| 8          |                                     |                   |         |       |       |       |       |       |       |
| 9          | Mean                                | 1.002             | 0.06177 |       |       |       |       |       |       |
| 10         | Std. Deviation                      | 0.07661           | 0.01209 |       |       |       |       |       |       |
| 11         | Std. Error of Mean                  | 0.04423           | 0.00698 |       |       |       |       |       |       |
| 12         |                                     |                   |         |       |       |       |       |       |       |
| 13         | Lower 95% CI of mean                | 0.8117            | 0.03173 |       |       |       |       |       |       |
| 14         | Upper 95% CI of mean                | 1.192             | 0.0918  |       |       |       |       |       |       |
| 15         |                                     |                   |         |       |       |       |       |       |       |
| 16         | Sum                                 | 3.006             | 0.1853  |       |       |       |       |       |       |
| 17         |                                     |                   |         |       |       |       |       |       |       |
| 18         | Shapiro-Wilk normality test         |                   |         |       |       |       |       |       |       |
| 19         | W                                   | 0.9458            | 0.8088  |       |       |       |       |       |       |
| 20         | P value                             | 0.5514            | 0.1357  |       |       |       |       |       |       |
| 21         | Passed normality test (alpha=0.05)? | Yes               | Yes     |       |       |       |       |       |       |
| 22         | P value summary                     | ns                | ns      |       |       |       |       |       |       |

Col. stats of Data 2

GraphPad Prism 7.00 - [Object in 统计图]

| Welch's t test |                                         |
|----------------|-----------------------------------------|
| 7              | Unpaired t test with Welch's correction |
| 8              | P value                                 |
| 9              | P value summary                         |
| 10             | Significantly different (P < 0.05)?     |
| 11             | One- or two-tailed P value?             |
| 12             | Welch-corrected t, df                   |
| 13             |                                         |
| 14             | How big is the difference?              |
| 15             | Mean ± SEM of column A                  |
| 16             | Mean ± SEM of column B                  |
| 17             | Difference between means                |
| 18             | 95% confidence interval                 |
| 19             | R squared (eta squared)                 |
| 20             |                                         |
| 21             | F test to compare variances             |
| 22             | F, DFn, Dfd                             |
| 23             | P value                                 |
| 24             | P value summary                         |
| 25             | Significantly different (P < 0.05)?     |
| 26             |                                         |
| 27             |                                         |
| 28             |                                         |

Welch's t test of Data 2

Figure 3F

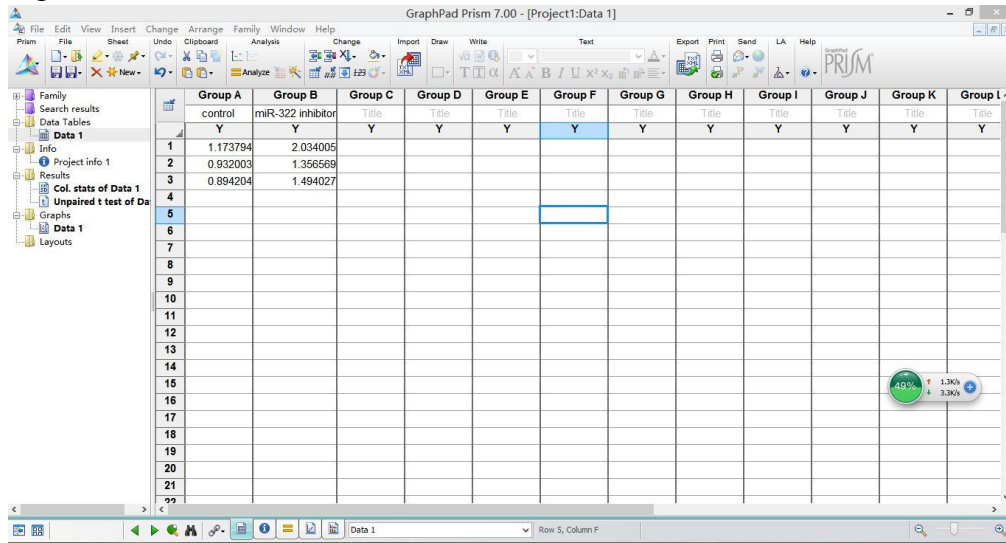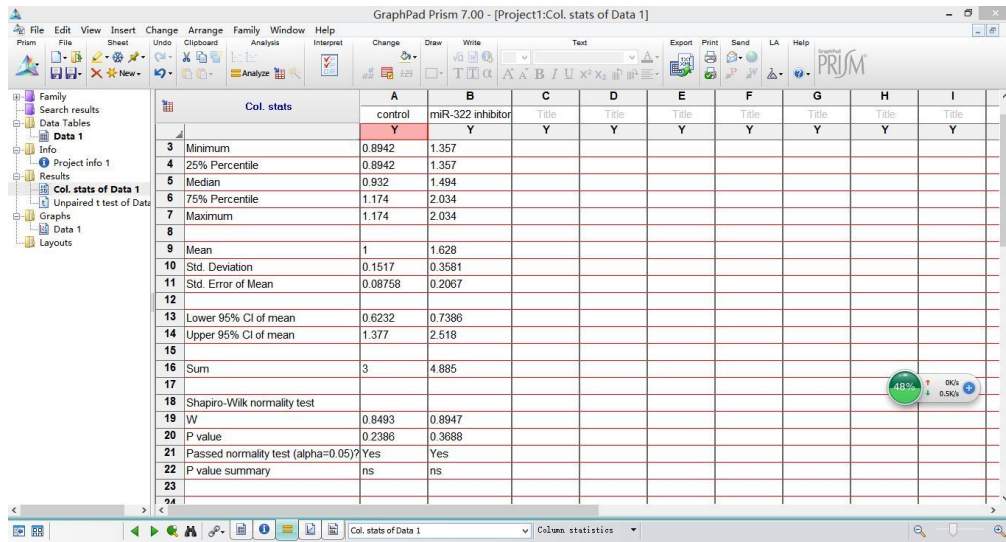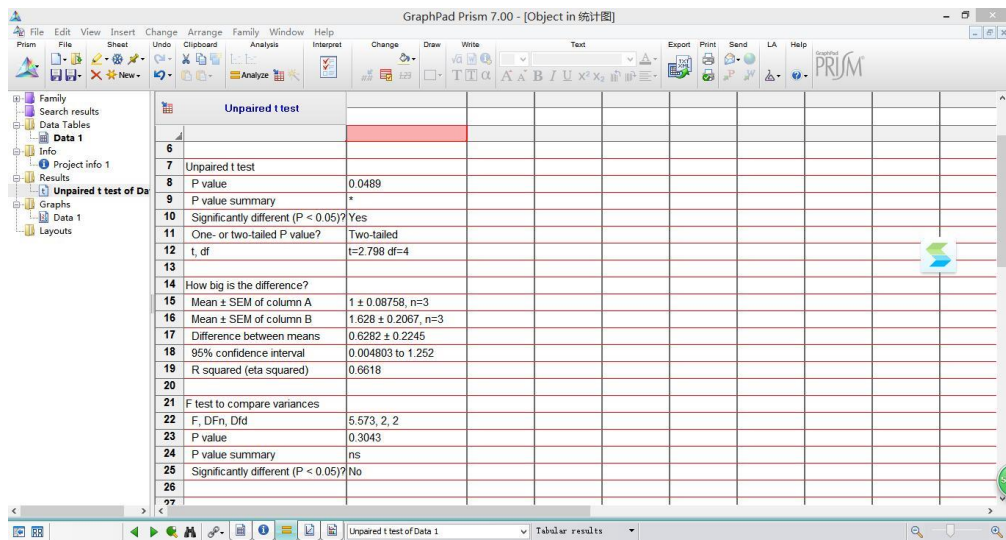



Figure 3G

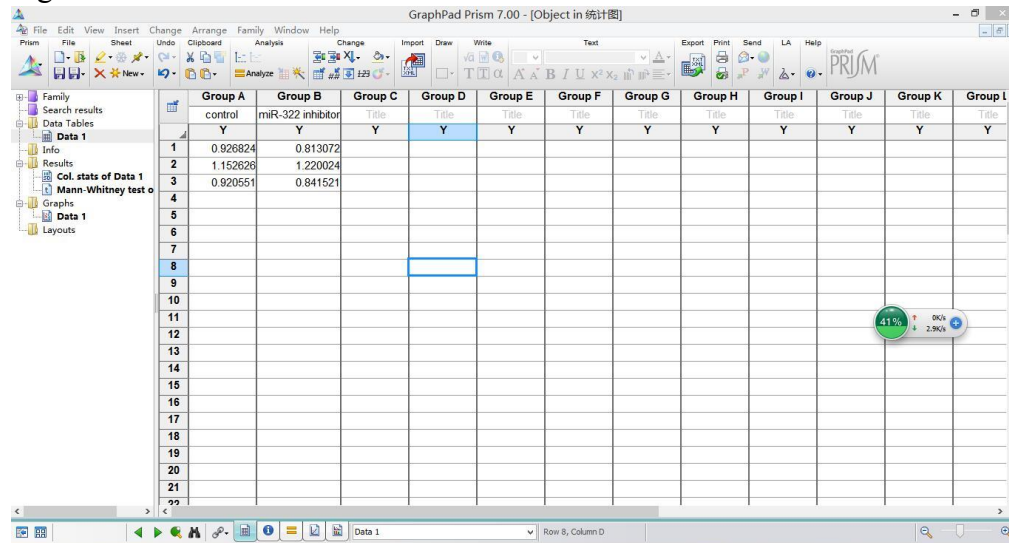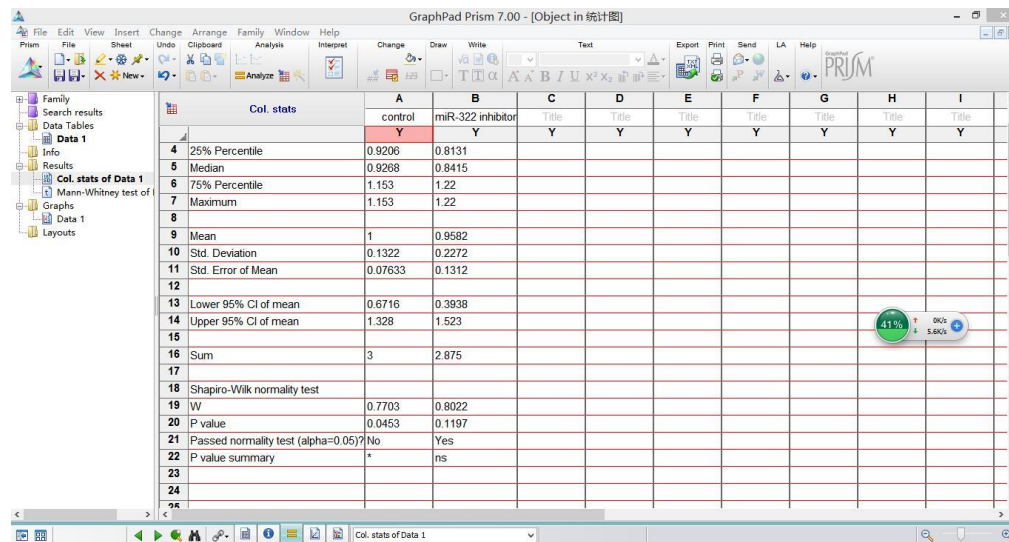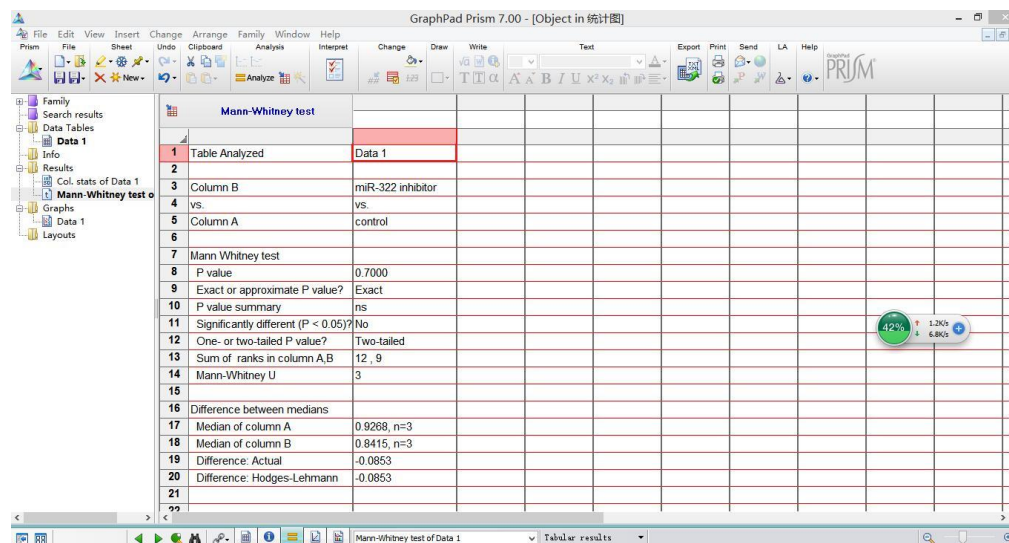

Figure 4A (NOX4)

GraphPad Prism 7.00 - [Project1:Data 1]

|    | Group A   | Group B   | Group C   | Group D | Group E | Group F | Group G | Group H | Group I | Group J | Group K | Group L |
|----|-----------|-----------|-----------|---------|---------|---------|---------|---------|---------|---------|---------|---------|
| 1  | shcontrol | shNOX4 1# | shNOx4 2# | Title   | Title   | Title   | Title   | Title   | Title   | Title   | Title   | Title   |
| 2  | Y         | Y         | Y         | Y       | Y       | Y       | Y       | Y       | Y       | Y       | Y       | Y       |
| 1  | 1.085402  | 1.034981  | 0.480254  |         |         |         |         |         |         |         |         |         |
| 2  | 1.003177  | 0.813072  | 0.521003  |         |         |         |         |         |         |         |         |         |
| 3  | 0.911422  | 0.624698  | 0.327203  |         |         |         |         |         |         |         |         |         |
| 4  |           |           |           |         |         |         |         |         |         |         |         |         |
| 5  |           |           |           |         |         |         |         |         |         |         |         |         |
| 6  |           |           |           |         |         |         |         |         |         |         |         |         |
| 7  |           |           |           |         |         |         |         |         |         |         |         |         |
| 8  |           |           |           |         |         |         |         |         |         |         |         |         |
| 9  |           |           |           |         |         |         |         |         |         |         |         |         |
| 10 |           |           |           |         |         |         |         |         |         |         |         |         |
| 11 |           |           |           |         |         |         |         |         |         |         |         |         |
| 12 |           |           |           |         |         |         |         |         |         |         |         |         |
| 13 |           |           |           |         |         |         |         |         |         |         |         |         |
| 14 |           |           |           |         |         |         |         |         |         |         |         |         |
| 15 |           |           |           |         |         |         |         |         |         |         |         |         |
| 16 |           |           |           |         |         |         |         |         |         |         |         |         |
| 17 |           |           |           |         |         |         |         |         |         |         |         |         |
| 18 |           |           |           |         |         |         |         |         |         |         |         |         |
| 19 |           |           |           |         |         |         |         |         |         |         |         |         |
| 20 |           |           |           |         |         |         |         |         |         |         |         |         |
| 21 |           |           |           |         |         |         |         |         |         |         |         |         |
| 22 |           |           |           |         |         |         |         |         |         |         |         |         |

GraphPad Prism 7.00 - [Project1:Col. stats of Data 1]

|    | A                                   | B         | C         | D       | E     | F     | G     | H     | I     |
|----|-------------------------------------|-----------|-----------|---------|-------|-------|-------|-------|-------|
| 7  | shcontrol                           | shNOX4 1# | shNOx4 2# | Title   | Title | Title | Title | Title | Title |
| 8  | Y                                   | Y         | Y         | Y       | Y     | Y     | Y     | Y     | Y     |
| 7  | Maximum                             | 1.085     | 1.035     | 0.521   |       |       |       |       |       |
| 9  | Mean                                | 1         | 0.8243    | 0.4428  |       |       |       |       |       |
| 10 | Std. Deviation                      | 0.08703   | 0.2054    | 0.1022  |       |       |       |       |       |
| 11 | Std. Error of Mean                  | 0.05025   | 0.1186    | 0.05699 |       |       |       |       |       |
| 13 | Lower 95% CI of mean                | 0.7838    | 0.3141    | 0.189   |       |       |       |       |       |
| 14 | Upper 95% CI of mean                | 1.216     | 1.334     | 0.6966  |       |       |       |       |       |
| 16 | Sum                                 | 3         | 2.473     | 1.328   |       |       |       |       |       |
| 18 | Shapiro-Wilk normality test         |           |           |         |       |       |       |       |       |
| 19 | W                                   | 0.999     | 0.9978    | 0.8993  |       |       |       |       |       |
| 20 | P value                             | 0.9396    | 0.9099    | 0.3834  |       |       |       |       |       |
| 21 | Passed normality test (alpha=0.05)? | Yes       | Yes       | Yes     |       |       |       |       |       |
| 22 | P value summary                     | ns        | ns        | ns      |       |       |       |       |       |

GraphPad Prism 7.00 - [Project1:Ordinary one-way ANOVA of Data 1]

|    | A                                           | B             | C                           |
|----|---------------------------------------------|---------------|-----------------------------|
| 1  | shcontrol                                   | shNOX4 1#     | shNOx4 2#                   |
| 2  | Y                                           | Y             | Y                           |
| 1  | Table Analyzed                              | Data 1        |                             |
| 2  | Data sets analyzed                          | A : shcontrol | B : shNOX4 1# C : shNOx4 2# |
| 4  | ANOVA summary                               |               |                             |
| 5  | F                                           | 12.13         |                             |
| 6  | P value                                     | 0.0078        |                             |
| 7  | P value summary                             | **            |                             |
| 8  | Significant diff. among means (P < 0.05)?   | Yes           |                             |
| 9  | R square                                    | 0.8017        |                             |
| 11 | Brown-Forsythe test                         |               |                             |
| 12 | F (DFn, DFd)                                | 0.7427 (2, 6) |                             |
| 13 | P value                                     | 0.5150        |                             |
| 14 | P value summary                             | ns            |                             |
| 15 | Are SDs significantly different (P < 0.05)? | No            |                             |
| 17 | Bartlett's test                             |               |                             |
| 18 | Bartlett's statistic (corrected)            |               |                             |
| 19 | P value                                     |               |                             |
| 20 | P value summary                             |               |                             |
| 21 | Are SDs significantly different (P < 0.05)? |               |                             |

GraphPad Prism 7.00 - [Project1:Ordinary one-way ANOVA of Data 1]

File Edit View Insert Change Arrange Family Window Help

Prism File Sheet Undo Clipboard Analysis Interpret Change Draw Write Text Export Print Send LA Help

smly  
 search results  
 ata Tables  
 Data 1  
 do  
 Project info 1  
 results  
 Col. stats of Data 1  
 Ordinary one-way ANOVA of  
 ANOVA  
 Multiple comparisons  
 graphs  
 Data 1  
 layouts

| 1way ANOVA<br>Multiple comparisons |                                     |            |                    |              |             |                  |     |           |    |
|------------------------------------|-------------------------------------|------------|--------------------|--------------|-------------|------------------|-----|-----------|----|
| 1                                  | Number of families                  | 1          |                    |              |             |                  |     |           |    |
| 2                                  | Number of comparisons per family    | 2          |                    |              |             |                  |     |           |    |
| 3                                  | Alpha                               | 0.05       |                    |              |             |                  |     |           |    |
| 4                                  |                                     |            |                    |              |             |                  |     |           |    |
| 5                                  | Dunnett's multiple comparisons test | Mean Diff. | 95.00% CI of diff. | Significant? | Summary     | Adjusted P Value | A-? |           |    |
| 6                                  |                                     |            |                    |              |             |                  |     |           |    |
| 7                                  | shcontrol vs. shNOx4 1#             | 0.1758     | -0.1554 to 0.5069  | No           | ns          | 0.2911           | B   | shNOx4 1# |    |
| 8                                  | shcontrol vs. shNOx4 2#             | 0.5572     | 0.2261 to 0.8883   | Yes          | **          | 0.0053           | C   | shNOx4 2# |    |
| 9                                  |                                     |            |                    |              |             |                  |     |           |    |
| 10                                 |                                     |            |                    |              |             |                  |     |           |    |
| 11                                 | Test details                        | Mean 1     | Mean 2             | Mean Diff.   | SE of diff. | n1               | n2  | q         | DF |
| 12                                 |                                     |            |                    |              |             |                  |     |           |    |
| 13                                 | shcontrol vs. shNOx4 1#             | 1          | 0.8243             | 0.1758       | 0.1157      | 3                | 3   | 1.52      | 6  |
| 14                                 | shcontrol vs. shNOx4 2#             | 1          | 0.4428             | 0.5572       | 0.1157      | 3                | 3   | 4.818     | 6  |
| 15                                 |                                     |            |                    |              |             |                  |     |           |    |
| 16                                 |                                     |            |                    |              |             |                  |     |           |    |
| 17                                 |                                     |            |                    |              |             |                  |     |           |    |
| 18                                 |                                     |            |                    |              |             |                  |     |           |    |
| 19                                 |                                     |            |                    |              |             |                  |     |           |    |
| 20                                 |                                     |            |                    |              |             |                  |     |           |    |
| 21                                 |                                     |            |                    |              |             |                  |     |           |    |
| 22                                 |                                     |            |                    |              |             |                  |     |           |    |

Ordinary one-way ANOVA of Data 1 Multiple comparisons

Figure 4A (Cleaved Caspase-3)

GraphPad Prism 7.00 - [Project1:Data 1]

|    | Group A<br>shcontrol | Group B<br>shNOX4 1# | Group C<br>shNOX4 2# | Group D<br>Title | Group E<br>Title | Group F<br>Title | Group G<br>Title | Group H<br>Title | Group I<br>Title | Group J<br>Title | Group K<br>Title | Group L<br>Title |
|----|----------------------|----------------------|----------------------|------------------|------------------|------------------|------------------|------------------|------------------|------------------|------------------|------------------|
| 1  | Y                    | Y                    | Y                    | Y                | Y                | Y                | Y                | Y                | Y                | Y                | Y                | Y                |
| 2  | 0.974243             | 0.740194             | 0.393524             |                  |                  |                  |                  |                  |                  |                  |                  |                  |
| 3  | 0.933670             | 0.530711             | 0.172928             |                  |                  |                  |                  |                  |                  |                  |                  |                  |
| 4  | 1.092086             | 0.616614             | 0.144560             |                  |                  |                  |                  |                  |                  |                  |                  |                  |
| 5  |                      |                      |                      |                  |                  |                  |                  |                  |                  |                  |                  |                  |
| 6  |                      |                      |                      |                  |                  |                  |                  |                  |                  |                  |                  |                  |
| 7  |                      |                      |                      |                  |                  |                  |                  |                  |                  |                  |                  |                  |
| 8  |                      |                      |                      |                  |                  |                  |                  |                  |                  |                  |                  |                  |
| 9  |                      |                      |                      |                  |                  |                  |                  |                  |                  |                  |                  |                  |
| 10 |                      |                      |                      |                  |                  |                  |                  |                  |                  |                  |                  |                  |
| 11 |                      |                      |                      |                  |                  |                  |                  |                  |                  |                  |                  |                  |
| 12 |                      |                      |                      |                  |                  |                  |                  |                  |                  |                  |                  |                  |
| 13 |                      |                      |                      |                  |                  |                  |                  |                  |                  |                  |                  |                  |
| 14 |                      |                      |                      |                  |                  |                  |                  |                  |                  |                  |                  |                  |
| 15 |                      |                      |                      |                  |                  |                  |                  |                  |                  |                  |                  |                  |
| 16 |                      |                      |                      |                  |                  |                  |                  |                  |                  |                  |                  |                  |
| 17 |                      |                      |                      |                  |                  |                  |                  |                  |                  |                  |                  |                  |
| 18 |                      |                      |                      |                  |                  |                  |                  |                  |                  |                  |                  |                  |
| 19 |                      |                      |                      |                  |                  |                  |                  |                  |                  |                  |                  |                  |
| 20 |                      |                      |                      |                  |                  |                  |                  |                  |                  |                  |                  |                  |
| 21 |                      |                      |                      |                  |                  |                  |                  |                  |                  |                  |                  |                  |
| 22 |                      |                      |                      |                  |                  |                  |                  |                  |                  |                  |                  |                  |

GraphPad Prism 7.00 - [Project1:Col. stats of Data 1]

| Col. stats | A                                   | B         | C         | D       | E     | F     | G     | H     | I     |
|------------|-------------------------------------|-----------|-----------|---------|-------|-------|-------|-------|-------|
|            | shcontrol                           | shNOX4 1# | shNOX4 2# | Title   | Title | Title | Title | Title | Title |
| 2          | Y                                   | Y         | Y         | Y       | Y     | Y     | Y     | Y     | Y     |
| 3          | Minimum                             | 0.9337    | 0.5307    | 0.1446  |       |       |       |       |       |
| 4          | 25% Percentile                      | 0.9337    | 0.5307    | 0.1446  |       |       |       |       |       |
| 5          | Median                              | 0.9742    | 0.6166    | 0.1729  |       |       |       |       |       |
| 6          | 75% Percentile                      | 1.092     | 0.7402    | 0.3935  |       |       |       |       |       |
| 7          | Maximum                             | 1.092     | 0.7402    | 0.3935  |       |       |       |       |       |
| 8          |                                     |           |           |         |       |       |       |       |       |
| 9          | Mean                                | 1         | 0.6292    | 0.237   |       |       |       |       |       |
| 10         | Std. Deviation                      | 0.08229   | 0.1053    | 0.1363  |       |       |       |       |       |
| 11         | Std. Error of Mean                  | 0.04751   | 0.0608    | 0.07969 |       |       |       |       |       |
| 12         |                                     |           |           |         |       |       |       |       |       |
| 13         | Lower 95% CI of mean                | 0.7956    | 0.3676    | -0.1016 |       |       |       |       |       |
| 14         | Upper 95% CI of mean                | 1.204     | 0.8908    | 0.5756  |       |       |       |       |       |
| 15         |                                     |           |           |         |       |       |       |       |       |
| 16         | Sum                                 | 3         | 1.888     | 0.711   |       |       |       |       |       |
| 17         |                                     |           |           |         |       |       |       |       |       |
| 18         | Shapiro-Wilk normality test         |           |           |         |       |       |       |       |       |
| 19         | W                                   | 0.9265    | 0.9893    | 0.8342  |       |       |       |       |       |
| 20         | P value                             | 0.4757    | 0.8024    | 0.1991  |       |       |       |       |       |
| 21         | Passed normality test (alpha=0.05)? | Yes       | Yes       | Yes     |       |       |       |       |       |
| 22         | P value summary                     | ns        | ns        | ns      |       |       |       |       |       |

GraphPad Prism 7.00 - [Project1:Ordinary one-way ANOVA of Data 1]

| 1way ANOVA |                                             |                |                             |
|------------|---------------------------------------------|----------------|-----------------------------|
| 1          | Table Analyzed                              | Data 1         |                             |
| 2          | Data sets analyzed                          | A : shcontrol  | B : shNOX4 1# C : shNOX4 2# |
| 3          |                                             |                |                             |
| 4          | ANOVA summary                               |                |                             |
| 5          | F                                           | 35.96          |                             |
| 6          | P value                                     | 0.0005         |                             |
| 7          | P value summary                             | ***            |                             |
| 8          | Significant diff. among means (P < 0.05)?   | Yes            |                             |
| 9          | R square                                    | 0.923          |                             |
| 10         |                                             |                |                             |
| 11         | Brown-Forsythe test                         |                |                             |
| 12         | F (DFn, DFd)                                | 0.09368 (2, 6) |                             |
| 13         | P value                                     | 0.9119         |                             |
| 14         | P value summary                             | ns             |                             |
| 15         | Are SDs significantly different (P < 0.05)? | No             |                             |
| 16         |                                             |                |                             |
| 17         | Bartlett's test                             |                |                             |
| 18         | Bartlett's statistic (corrected)            |                |                             |
| 19         | P value                                     |                |                             |
| 20         | P value summary                             |                |                             |
| 21         | Are SDs significantly different (P < 0.05)? |                |                             |
| 22         |                                             |                |                             |



GraphPad Prism 7.00 - [Project1:Ordinary one-way ANOVA of Data 1]

File Edit View Insert Change Arrange Family Window Help

Prism File Sheet Undo Clipboard Analysis Interpret Change Draw Write Text Export Print Send LA Help

Family

Search results

Data Tables

Data 1

Info

Project info 1

Results

Col. stats of Data 1

Ordinary one-way ANOVA

ANOVA

Multiple comparisons

Graphs

Data 1

Layouts

| 1way ANOVA           |                                     |            |                    |              |             |                  |     |           |    |
|----------------------|-------------------------------------|------------|--------------------|--------------|-------------|------------------|-----|-----------|----|
| Multiple comparisons |                                     |            |                    |              |             |                  |     |           |    |
| 1                    | Number of families                  | 1          |                    |              |             |                  |     |           |    |
| 2                    | Number of comparisons per family    | 2          |                    |              |             |                  |     |           |    |
| 3                    | Alpha                               | 0.05       |                    |              |             |                  |     |           |    |
| 4                    |                                     |            |                    |              |             |                  |     |           |    |
| 5                    | Dunnett's multiple comparisons test | Mean Diff. | 95.00% CI of diff. | Significant? | Summary     | Adjusted P Value | A-? |           |    |
| 6                    |                                     |            |                    |              |             |                  |     |           |    |
| 7                    | shcontrol vs. shNOX4 1#             | 0.3708     | 0.1132 to 0.6285   | Yes          | *           | 0.0111           | B   | shNOX4 1# |    |
| 8                    | shcontrol vs. shNOX4 2#             | 0.763      | 0.5054 to 1.021    | Yes          | ***         | 0.0003           | C   | shNOX4 2# |    |
| 9                    |                                     |            |                    |              |             |                  |     |           |    |
| 10                   |                                     |            |                    |              |             |                  |     |           |    |
| 11                   | Test details                        | Mean 1     | Mean 2             | Mean Diff.   | SE of diff. | n1               | n2  | q         | DF |
| 12                   |                                     |            |                    |              |             |                  |     |           |    |
| 13                   | shcontrol vs. shNOX4 1#             | 1          | 0.6292             | 0.3708       | 0.08998     | 3                | 3   | 4.121     | 6  |
| 14                   | shcontrol vs. shNOX4 2#             | 1          | 0.237              | 0.763        | 0.08998     | 3                | 3   | 8.479     | 6  |
| 15                   |                                     |            |                    |              |             |                  |     |           |    |
| 16                   |                                     |            |                    |              |             |                  |     |           |    |
| 17                   |                                     |            |                    |              |             |                  |     |           |    |
| 18                   |                                     |            |                    |              |             |                  |     |           |    |
| 19                   |                                     |            |                    |              |             |                  |     |           |    |
| 20                   |                                     |            |                    |              |             |                  |     |           |    |
| 21                   |                                     |            |                    |              |             |                  |     |           |    |

Ordinary one-way ANOVA of Data 1 Multiple comparisons

Figure 4A (Bax/Bcl-2)

GraphPad Prism 7.00 - [Project1:Data 1]

|    | Group A   | Group B   | Group C   | Group D | Group E | Group F | Group G | Group H | Group I | Group J | Group K | Group L |
|----|-----------|-----------|-----------|---------|---------|---------|---------|---------|---------|---------|---------|---------|
|    | shcontrol | shNOX4 1# | shNOX4 2# | Title   | Title   | Title   | Title   | Title   | Title   | Title   | Title   | Title   |
| 1  | Y         | Y         | Y         | Y       | Y       | Y       | Y       | Y       | Y       | Y       | Y       | Y       |
| 2  | 0.878692  | 0.640756  | 0.378170  |         |         |         |         |         |         |         |         |         |
| 3  | 1.018888  | 0.415027  | 0.161880  |         |         |         |         |         |         |         |         |         |
| 4  | 1.104419  | 0.477991  | 0.324051  |         |         |         |         |         |         |         |         |         |
| 5  |           |           |           |         |         |         |         |         |         |         |         |         |
| 6  |           |           |           |         |         |         |         |         |         |         |         |         |
| 7  |           |           |           |         |         |         |         |         |         |         |         |         |
| 8  |           |           |           |         |         |         |         |         |         |         |         |         |
| 9  |           |           |           |         |         |         |         |         |         |         |         |         |
| 10 |           |           |           |         |         |         |         |         |         |         |         |         |
| 11 |           |           |           |         |         |         |         |         |         |         |         |         |
| 12 |           |           |           |         |         |         |         |         |         |         |         |         |
| 13 |           |           |           |         |         |         |         |         |         |         |         |         |
| 14 |           |           |           |         |         |         |         |         |         |         |         |         |
| 15 |           |           |           |         |         |         |         |         |         |         |         |         |
| 16 |           |           |           |         |         |         |         |         |         |         |         |         |
| 17 |           |           |           |         |         |         |         |         |         |         |         |         |
| 18 |           |           |           |         |         |         |         |         |         |         |         |         |
| 19 |           |           |           |         |         |         |         |         |         |         |         |         |
| 20 |           |           |           |         |         |         |         |         |         |         |         |         |
| 21 |           |           |           |         |         |         |         |         |         |         |         |         |
| 22 |           |           |           |         |         |         |         |         |         |         |         |         |

GraphPad Prism 7.00 - [Project1:Col. stats of Data 1]

| Col. stats | A                                   | B         | C         | D        | E     | F     | G     | H     | I     |
|------------|-------------------------------------|-----------|-----------|----------|-------|-------|-------|-------|-------|
|            | shcontrol                           | shNOX4 1# | shNOX4 2# | Title    | Title | Title | Title | Title | Title |
| 10         | Y                                   | Y         | Y         | Y        | Y     | Y     | Y     | Y     | Y     |
| 11         | Std. Deviation                      | 0.115     | 0.1165    | 0.1126   |       |       |       |       |       |
| 12         | Std. Error of Mean                  | 0.06641   | 0.06725   | 0.06498  |       |       |       |       |       |
| 13         | Lower 95% CI of mean                | 0.7142    | 0.2219    | 0.008435 |       |       |       |       |       |
| 14         | Upper 95% CI of mean                | 1.286     | 0.8006    | 0.5676   |       |       |       |       |       |
| 15         | Sum                                 | 3         | 1.534     | 0.8641   |       |       |       |       |       |
| 18         | Shapiro-Wilk normality test         |           |           |          |       |       |       |       |       |
| 19         | W                                   | 0.9798    | 0.9388    | 0.9232   |       |       |       |       |       |
| 20         | P value                             | 0.7275    | 0.5227    | 0.4637   |       |       |       |       |       |
| 21         | Passed normality test (alpha=0.05)? | Yes       | Yes       | Yes      |       |       |       |       |       |
| 22         | P value summary                     | ns        | ns        | ns       |       |       |       |       |       |

GraphPad Prism 7.00 - [Project1:Ordinary one-way ANOVA of Data 1]

| 1way ANOVA |                                             |                                        |  |
|------------|---------------------------------------------|----------------------------------------|--|
| 1          | Table Analyzed                              | Data 1                                 |  |
| 2          | Data sets analyzed                          | A: shcontrol B: shNOX4 1# C: shNOX4 2# |  |
| 4          | ANOVA summary                               |                                        |  |
| 5          | F                                           | 30.24                                  |  |
| 6          | P value                                     | 0.0007                                 |  |
| 7          | P value summary                             | ***                                    |  |
| 8          | Significant diff. among means (P < 0.05)?   | Yes                                    |  |
| 9          | R square                                    | 0.9097                                 |  |
| 11         | Brown-Forsythe test                         |                                        |  |
| 12         | F (DFn, DFd)                                | 0.001998 (2, 6)                        |  |
| 13         | P value                                     | 0.9980                                 |  |
| 14         | P value summary                             | ns                                     |  |
| 15         | Are SDs significantly different (P < 0.05)? | No                                     |  |
| 17         | Bartlett's test                             |                                        |  |
| 18         | Bartlett's statistic (corrected)            |                                        |  |
| 19         | P value                                     |                                        |  |
| 20         | P value summary                             |                                        |  |
| 21         | Are SDs significantly different (P < 0.05)? |                                        |  |

GraphPad Prism 7.00 - [Project1:Ordinary one-way ANOVA of Data 1]

File Edit View Insert Change Arrange Family Window Help

Prism File Sheet Undo Clipboard Analysis Interpret Change Draw Write Text Export Print Send LA Help

Family  
 Search results  
 Data Tables  
 Data 1  
 Info  
 Project info 1  
 Results  
 Col. stats of Data 1  
 Ordinary one-way ANOVA  
 ANOVA  
 Multiple comparisons  
 Graphs  
 Data 1  
 Layouts

| 1way ANOVA           |                                     |            |                    |              |             |                  |     |           |    |
|----------------------|-------------------------------------|------------|--------------------|--------------|-------------|------------------|-----|-----------|----|
| Multiple comparisons |                                     |            |                    |              |             |                  |     |           |    |
| 1                    | Number of families                  | 1          |                    |              |             |                  |     |           |    |
| 2                    | Number of comparisons per family    | 2          |                    |              |             |                  |     |           |    |
| 3                    | Alpha                               | 0.05       |                    |              |             |                  |     |           |    |
| 4                    |                                     |            |                    |              |             |                  |     |           |    |
| 5                    | Dunnett's multiple comparisons test | Mean Diff. | 95.00% CI of diff. | Significant? | Summary     | Adjusted P Value | A-? |           |    |
| 6                    |                                     |            |                    |              |             |                  |     |           |    |
| 7                    | shcontrol vs. shNOX4 1#             | 0.4887     | 0.2206 to 0.7569   | Yes          | **          | 0.0036           | B   | shNOX4 1# |    |
| 8                    | shcontrol vs. shNOX4 2#             | 0.712      | 0.4438 to 0.9801   | Yes          | ***         | 0.0005           | C   | shNOX4 2# |    |
| 9                    |                                     |            |                    |              |             |                  |     |           |    |
| 10                   |                                     |            |                    |              |             |                  |     |           |    |
| 11                   | Test details                        | Mean 1     | Mean 2             | Mean Diff.   | SE of diff. | n1               | n2  | q         | DF |
| 12                   |                                     |            |                    |              |             |                  |     |           |    |
| 13                   | shcontrol vs. shNOX4 1#             | 1          | 0.5113             | 0.4887       | 0.09365     | 3                | 3   | 5.219     | 6  |
| 14                   | shcontrol vs. shNOX4 2#             | 1          | 0.288              | 0.712        | 0.09365     | 3                | 3   | 7.602     | 6  |
| 15                   |                                     |            |                    |              |             |                  |     |           |    |
| 16                   |                                     |            |                    |              |             |                  |     |           |    |
| 17                   |                                     |            |                    |              |             |                  |     |           |    |
| 18                   |                                     |            |                    |              |             |                  |     |           |    |
| 19                   |                                     |            |                    |              |             |                  |     |           |    |
| 20                   |                                     |            |                    |              |             |                  |     |           |    |
| 21                   |                                     |            |                    |              |             |                  |     |           |    |
| 22                   |                                     |            |                    |              |             |                  |     |           |    |

Ordinary one-way ANOVA of Data 1 | Multiple comparisons

Figure 4B (NOX4)

GraphPad Prism 7.00 - [Object in 统计图]

|    | Group A  | Group B  | Group C            | Group D | Group E | Group F | Group G | Group H | Group I | Group J | Group K | Group L |
|----|----------|----------|--------------------|---------|---------|---------|---------|---------|---------|---------|---------|---------|
|    | control  | NOX4     | NOX4+miR-322 mimic | Title   | Title   | Title   | Title   | Title   | Title   | Title   | Title   | Title   |
| 1  | Y        | Y        | Y                  | Y       | Y       | Y       | Y       | Y       | Y       | Y       | Y       | Y       |
| 2  | 0.971017 | 2.982121 | 1.533381           |         |         |         |         |         |         |         |         |         |
| 3  | 1.259454 | 1.916222 | 1.238745           |         |         |         |         |         |         |         |         |         |
| 4  | 0.769529 | 3.040475 | 1.583079           |         |         |         |         |         |         |         |         |         |
| 5  |          |          |                    |         |         |         |         |         |         |         |         |         |
| 6  |          |          |                    |         |         |         |         |         |         |         |         |         |
| 7  |          |          |                    |         |         |         |         |         |         |         |         |         |
| 8  |          |          |                    |         |         |         |         |         |         |         |         |         |
| 9  |          |          |                    |         |         |         |         |         |         |         |         |         |
| 10 |          |          |                    |         |         |         |         |         |         |         |         |         |
| 11 |          |          |                    |         |         |         |         |         |         |         |         |         |
| 12 |          |          |                    |         |         |         |         |         |         |         |         |         |
| 13 |          |          |                    |         |         |         |         |         |         |         |         |         |
| 14 |          |          |                    |         |         |         |         |         |         |         |         |         |
| 15 |          |          |                    |         |         |         |         |         |         |         |         |         |
| 16 |          |          |                    |         |         |         |         |         |         |         |         |         |
| 17 |          |          |                    |         |         |         |         |         |         |         |         |         |
| 18 |          |          |                    |         |         |         |         |         |         |         |         |         |
| 19 |          |          |                    |         |         |         |         |         |         |         |         |         |
| 20 |          |          |                    |         |         |         |         |         |         |         |         |         |
| 21 |          |          |                    |         |         |         |         |         |         |         |         |         |
| 22 |          |          |                    |         |         |         |         |         |         |         |         |         |

GraphPad Prism 7.00 - [Object in 统计图]

| Col. stats | A       | B      | C                  | D     | E     | F     | G     | H     | I     |
|------------|---------|--------|--------------------|-------|-------|-------|-------|-------|-------|
|            | control | NOX4   | NOX4+miR-322 mimic | Title | Title | Title | Title | Title | Title |
| 1          | Y       | Y      | Y                  | Y     | Y     | Y     | Y     | Y     | Y     |
| 2          | 3       | 3      | 3                  |       |       |       |       |       |       |
| 3          | 0.7695  | 1.916  | 1.239              |       |       |       |       |       |       |
| 4          | 0.7695  | 1.916  | 1.239              |       |       |       |       |       |       |
| 5          | 0.971   | 2.982  | 1.533              |       |       |       |       |       |       |
| 6          | 1.259   | 3.04   | 1.583              |       |       |       |       |       |       |
| 7          | 1.259   | 3.04   | 1.583              |       |       |       |       |       |       |
| 8          |         |        |                    |       |       |       |       |       |       |
| 9          | 1       | 2.646  | 1.452              |       |       |       |       |       |       |
| 10         | 0.2462  | 0.6329 | 0.1861             |       |       |       |       |       |       |
| 11         | 0.1422  | 0.3654 | 0.1075             |       |       |       |       |       |       |
| 12         |         |        |                    |       |       |       |       |       |       |
| 13         | 0.3883  | 1.074  | 0.9894             |       |       |       |       |       |       |
| 14         | 1.612   | 4.219  | 1.914              |       |       |       |       |       |       |
| 15         |         |        |                    |       |       |       |       |       |       |
| 16         | 3       | 7.939  | 4.355              |       |       |       |       |       |       |
| 17         |         |        |                    |       |       |       |       |       |       |
| 18         |         |        |                    |       |       |       |       |       |       |
| 19         | 0.9896  | 0.7888 | 0.8557             |       |       |       |       |       |       |
| 20         | 0.8050  | 0.0881 | 0.2557             |       |       |       |       |       |       |
| 21         | Yes     | Yes    | Yes                |       |       |       |       |       |       |
| 22         |         |        |                    |       |       |       |       |       |       |

GraphPad Prism 7.00 - [Object in 统计图]

| 1way ANOVA |                                             |               |                               |
|------------|---------------------------------------------|---------------|-------------------------------|
| 1          | Table Analyzed                              | Data 1        |                               |
| 2          | Data sets analyzed                          | A: control    | B: NOX4 C: NOX4+miR-322 mimic |
| 3          |                                             |               |                               |
| 4          | ANOVA summary                               |               |                               |
| 5          | F                                           | 13.13         |                               |
| 6          | P value                                     | 0.0064        |                               |
| 7          | P value summary                             | **            |                               |
| 8          | Significant diff. among means (P < 0.05)?   | Yes           |                               |
| 9          | R square                                    | 0.814         |                               |
| 10         |                                             |               |                               |
| 11         | Brown-Forsythe test                         |               |                               |
| 12         | F (DFn, DFd)                                | 0.4237 (2, 6) |                               |
| 13         | P value                                     | 0.6728        |                               |
| 14         | P value summary                             | ns            |                               |
| 15         | Are SDs significantly different (P < 0.05)? | No            |                               |
| 16         |                                             |               |                               |
| 17         | Bartlett's test                             |               |                               |
| 18         | Bartlett's statistic (corrected)            |               |                               |
| 19         | P value                                     |               |                               |
| 20         | P value summary                             |               |                               |
| 21         | Are SDs significantly different (P < 0.05)? |               |                               |
| 22         |                                             |               |                               |

GraphPad Prism 7.00 - [Object in 统计图]

File Edit View Insert Change Arrange Family Window Help

Prism File Sheet Undo Clipboard Analysis Interpret Change Draw Write Text Export Print Send LA Help

Family

Search results

Data Tables

Data 1

Info

Project info 1

Results

Col. stats of Data 1

Ordinary one-way ANOVA

ANOVA

Multiple comparisons

Graphs

Data 1

Layouts

| 1-way ANOVA          |                                     |            |                    |              |             |                  |     |                    |
|----------------------|-------------------------------------|------------|--------------------|--------------|-------------|------------------|-----|--------------------|
| Multiple comparisons |                                     |            |                    |              |             |                  |     |                    |
| 1                    | Number of families                  | 1          |                    |              |             |                  |     |                    |
| 2                    | Number of comparisons per family    | 2          |                    |              |             |                  |     |                    |
| 3                    | Alpha                               | 0.05       |                    |              |             |                  |     |                    |
| 4                    |                                     |            |                    |              |             |                  |     |                    |
| 5                    | Dunnett's multiple comparisons test | Mean Diff. | 95.00% CI of diff. | Significant? | Summary     | Adjusted P Value | B-? |                    |
| 6                    |                                     |            |                    |              |             |                  |     |                    |
| 7                    | NOX4 vs. control                    | 1.646      | 0.6959 to 2.597    | Yes          | **          | 0.0046           | A   | control            |
| 8                    | NOX4 vs. NOX4+miR-322 mimic         | 1.195      | 0.2441 to 2.145    | Yes          | *           | 0.0202           | C   | NOX4+miR-322 mimic |
| 9                    |                                     |            |                    |              |             |                  |     |                    |
| 10                   |                                     |            |                    |              |             |                  |     |                    |
| 11                   | Test details                        | Mean 1     | Mean 2             | Mean Diff.   | SE of diff. | n1               | n2  | q                  |
| 12                   |                                     |            |                    |              |             |                  |     | DF                 |
| 13                   | NOX4 vs. control                    | 2.646      | 1                  | 1.646        | 0.332       | 3                | 3   | 4.959              |
| 14                   | NOX4 vs. NOX4+miR-322 mimic         | 2.646      | 1.452              | 1.195        | 0.332       | 3                | 3   | 3.599              |
| 15                   |                                     |            |                    |              |             |                  |     |                    |
| 16                   |                                     |            |                    |              |             |                  |     |                    |
| 17                   |                                     |            |                    |              |             |                  |     |                    |
| 18                   |                                     |            |                    |              |             |                  |     |                    |
| 19                   |                                     |            |                    |              |             |                  |     |                    |
| 20                   |                                     |            |                    |              |             |                  |     |                    |
| 21                   |                                     |            |                    |              |             |                  |     |                    |

Ordinary one-way ANOVA of Data 1 | Multiple comparisons

Figure 4B (Cleaved Caspase-3)

GraphPad Prism 7.00 - [Object in 统计图]

|    | Group A  | Group B  | Group C            | Group D | Group E | Group F | Group G | Group H | Group I | Group J | Group K | Gr A |
|----|----------|----------|--------------------|---------|---------|---------|---------|---------|---------|---------|---------|------|
| 1  | control  | NOX4     | NOX4+miR-322 mimic | Title   | Title   | Title   | Title   | Title   | Title   | Title   | Title   |      |
| 2  | Y        | Y        | Y                  | Y       | Y       | Y       | Y       | Y       | Y       | Y       | Y       |      |
| 3  | 1.180958 | 1.757058 | 0.737129           |         |         |         |         |         |         |         |         |      |
| 4  | 0.998587 | 1.434672 | 1.124777           |         |         |         |         |         |         |         |         |      |
| 5  | 0.820455 | 1.381080 | 1.149701           |         |         |         |         |         |         |         |         |      |
| 6  |          |          |                    |         |         |         |         |         |         |         |         |      |
| 7  |          |          |                    |         |         |         |         |         |         |         |         |      |
| 8  |          |          |                    |         |         |         |         |         |         |         |         |      |
| 9  |          |          |                    |         |         |         |         |         |         |         |         |      |
| 10 |          |          |                    |         |         |         |         |         |         |         |         |      |
| 11 |          |          |                    |         |         |         |         |         |         |         |         |      |
| 12 |          |          |                    |         |         |         |         |         |         |         |         |      |
| 13 |          |          |                    |         |         |         |         |         |         |         |         |      |
| 14 |          |          |                    |         |         |         |         |         |         |         |         |      |
| 15 |          |          |                    |         |         |         |         |         |         |         |         |      |
| 16 |          |          |                    |         |         |         |         |         |         |         |         |      |
| 17 |          |          |                    |         |         |         |         |         |         |         |         |      |
| 18 |          |          |                    |         |         |         |         |         |         |         |         |      |
| 19 |          |          |                    |         |         |         |         |         |         |         |         |      |
| 20 |          |          |                    |         |         |         |         |         |         |         |         |      |
| 21 |          |          |                    |         |         |         |         |         |         |         |         |      |
| 22 |          |          |                    |         |         |         |         |         |         |         |         |      |

GraphPad Prism 7.00 - [Object in 统计图]

| Col. stats | A                                   | B      | C                  | D      | E     | F     | G     | H     | I     |
|------------|-------------------------------------|--------|--------------------|--------|-------|-------|-------|-------|-------|
|            | control                             | NOX4   | NOX4+miR-322 mimic | Title  | Title | Title | Title | Title | Title |
| 2          | Y                                   | Y      | Y                  | Y      | Y     | Y     | Y     | Y     | Y     |
| 3          | Minimum                             | 0.8205 | 1.381              | 0.7371 |       |       |       |       |       |
| 4          | 25% Percentile                      | 0.8205 | 1.381              | 0.7371 |       |       |       |       |       |
| 5          | Median                              | 0.9986 | 1.435              | 1.125  |       |       |       |       |       |
| 6          | 75% Percentile                      | 1.181  | 1.757              | 1.15   |       |       |       |       |       |
| 7          | Maximum                             | 1.181  | 1.757              | 1.15   |       |       |       |       |       |
| 8          |                                     |        |                    |        |       |       |       |       |       |
| 9          | Mean                                | 1      | 1.524              | 1.004  |       |       |       |       |       |
| 10         | Std. Deviation                      | 0.1803 | 0.2034             | 0.2313 |       |       |       |       |       |
| 11         | Std. Error of Mean                  | 0.1041 | 0.1174             | 0.1336 |       |       |       |       |       |
| 12         |                                     |        |                    |        |       |       |       |       |       |
| 13         | Lower 95% CI of mean                | 0.5522 | 1.019              | 0.4292 |       |       |       |       |       |
| 14         | Upper 95% CI of mean                | 1.448  | 2.029              | 1.579  |       |       |       |       |       |
| 15         |                                     |        |                    |        |       |       |       |       |       |
| 16         | Sum                                 | 3      | 4.573              | 3.012  |       |       |       |       |       |
| 17         |                                     |        |                    |        |       |       |       |       |       |
| 18         | Shapiro-Wilk normality test         |        |                    |        |       |       |       |       |       |
| 19         | W                                   | 1      | 0.8544             | 0.7951 |       |       |       |       |       |
| 20         | P value                             | 0.9870 | 0.2524             | 0.1029 |       |       |       |       |       |
| 21         | Passed normality test (alpha=0.05)? | Yes    | Yes                | Yes    |       |       |       |       |       |
| 22         | P value summary                     | ns     | ns                 | ns     |       |       |       |       |       |

GraphPad Prism 7.00 - [Object in 统计图]

| 1way ANOVA |                                             |                 |         |                       |
|------------|---------------------------------------------|-----------------|---------|-----------------------|
| ANOVA      |                                             |                 |         |                       |
| 1          | Table Analyzed                              | Data 1          |         |                       |
| 2          | Data sets analyzed                          | A: control      | B: NOX4 | C: NOX4+miR-322 mimic |
| 3          |                                             |                 |         |                       |
| 4          | ANOVA summary                               |                 |         |                       |
| 5          | F                                           | 6.426           |         |                       |
| 6          | P value                                     | 0.0322          |         |                       |
| 7          | P value summary                             | *               |         |                       |
| 8          | Significant diff. among means (P < 0.05)?   | Yes             |         |                       |
| 9          | R square                                    | 0.6817          |         |                       |
| 10         |                                             |                 |         |                       |
| 11         | Brown-Forsythe test                         |                 |         |                       |
| 12         | F (DFn, DFd)                                | 0.008147 (2, 6) |         |                       |
| 13         | P value                                     | 0.9919          |         |                       |
| 14         | P value summary                             | ns              |         |                       |
| 15         | Are SDs significantly different (P < 0.05)? | No              |         |                       |
| 16         |                                             |                 |         |                       |
| 17         | Bartlett's test                             |                 |         |                       |
| 18         | Bartlett's statistic (corrected)            |                 |         |                       |
| 19         | P value                                     |                 |         |                       |
| 20         | P value summary                             |                 |         |                       |
| 21         | Are SDs significantly different (P < 0.05)? |                 |         |                       |



GraphPad Prism 7.00 - [Object in 统计图]

File Edit View Insert Change Arrange Family Window Help  
 Prism File Sheet Undo Clipboard Analysis Interpret Change Draw Write Text Export Print Send LA Help

Family  
 Search results  
 Data Tables  
 Data 1  
 Info  
 Project info 1  
 Results  
 Col. stats of Data 1  
 Ordinary one-way ANOVA  
 ANOVA  
 Multiple comparisons  
 Graphs  
 Data 1  
 Layouts

| 1way ANOVA           |                                     |            |                    |              |             |                  |     |                    |    |
|----------------------|-------------------------------------|------------|--------------------|--------------|-------------|------------------|-----|--------------------|----|
| Multiple comparisons |                                     |            |                    |              |             |                  |     |                    |    |
| 1                    | Number of families                  | 1          |                    |              |             |                  |     |                    |    |
| 2                    | Number of comparisons per family    | 2          |                    |              |             |                  |     |                    |    |
| 3                    | Alpha                               | 0.05       |                    |              |             |                  |     |                    |    |
| 4                    |                                     |            |                    |              |             |                  |     |                    |    |
| 5                    | Dunnett's multiple comparisons test | Mean Diff. | 95.00% CI of diff. | Significant? | Summary     | Adjusted P Value | B-? |                    |    |
| 6                    |                                     |            |                    |              |             |                  |     |                    |    |
| 7                    | NOX4 vs. control                    | 0.5243     | 0.04259 to 1.006   | Yes          | *           | 0.0363           | A   | control            |    |
| 8                    | NOX4 vs. NOX4+miR-322 mimic         | 0.5204     | 0.03872 to 1.002   | Yes          | *           | 0.0374           | C   | NOX4+miR-322 mimic |    |
| 9                    |                                     |            |                    |              |             |                  |     |                    |    |
| 10                   |                                     |            |                    |              |             |                  |     |                    |    |
| 11                   | Test details                        | Mean 1     | Mean 2             | Mean Diff.   | SE of diff. | n1               | n2  | q                  | DF |
| 12                   |                                     |            |                    |              |             |                  |     |                    |    |
| 13                   | NOX4 vs. control                    | 1.524      | 1                  | 0.5243       | 0.1682      | 3                | 3   | 3.116              | 6  |
| 14                   | NOX4 vs. NOX4+miR-322 mimic         | 1.524      | 1.004              | 0.5204       | 0.1682      | 3                | 3   | 3.093              | 6  |
| 15                   |                                     |            |                    |              |             |                  |     |                    |    |
| 16                   |                                     |            |                    |              |             |                  |     |                    |    |
| 17                   |                                     |            |                    |              |             |                  |     |                    |    |
| 18                   |                                     |            |                    |              |             |                  |     |                    |    |
| 19                   |                                     |            |                    |              |             |                  |     |                    |    |
| 20                   |                                     |            |                    |              |             |                  |     |                    |    |
| 21                   |                                     |            |                    |              |             |                  |     |                    |    |
| 22                   |                                     |            |                    |              |             |                  |     |                    |    |

Ordinary one-way ANOVA of Data 1 Multiple comparisons

Figure 4B (Bax/Bcl-2)

GraphPad Prism 7.00 - [Object in 统计图]

|    | Group A  | Group B  | Group C            | Group D | Group E | Group F | Group G | Group H | Group I | Group J | Group K | Group L |
|----|----------|----------|--------------------|---------|---------|---------|---------|---------|---------|---------|---------|---------|
|    | control  | NOX4     | NOX4+miR-322 mimic | Title   | Title   | Title   | Title   | Title   | Title   | Title   | Title   | Title   |
| 1  | 1.071458 | 2.002123 | 1.080241           |         |         |         |         |         |         |         |         |         |
| 2  | 0.936559 | 1.815811 | 0.806042           |         |         |         |         |         |         |         |         |         |
| 3  | 0.991982 | 1.925176 | 0.599078           |         |         |         |         |         |         |         |         |         |
| 4  |          |          |                    |         |         |         |         |         |         |         |         |         |
| 5  |          |          |                    |         |         |         |         |         |         |         |         |         |
| 6  |          |          |                    |         |         |         |         |         |         |         |         |         |
| 7  |          |          |                    |         |         |         |         |         |         |         |         |         |
| 8  |          |          |                    |         |         |         |         |         |         |         |         |         |
| 9  |          |          |                    |         |         |         |         |         |         |         |         |         |
| 10 |          |          |                    |         |         |         |         |         |         |         |         |         |
| 11 |          |          |                    |         |         |         |         |         |         |         |         |         |
| 12 |          |          |                    |         |         |         |         |         |         |         |         |         |
| 13 |          |          |                    |         |         |         |         |         |         |         |         |         |
| 14 |          |          |                    |         |         |         |         |         |         |         |         |         |
| 15 |          |          |                    |         |         |         |         |         |         |         |         |         |
| 16 |          |          |                    |         |         |         |         |         |         |         |         |         |
| 17 |          |          |                    |         |         |         |         |         |         |         |         |         |
| 18 |          |          |                    |         |         |         |         |         |         |         |         |         |
| 19 |          |          |                    |         |         |         |         |         |         |         |         |         |
| 20 |          |          |                    |         |         |         |         |         |         |         |         |         |
| 21 |          |          |                    |         |         |         |         |         |         |         |         |         |
| 22 |          |          |                    |         |         |         |         |         |         |         |         |         |

GraphPad Prism 7.00 - [Object in 统计图]

| Col. stats |                                     | A       | B       | C                  | D     | E     | F     | G     | H     | I     |
|------------|-------------------------------------|---------|---------|--------------------|-------|-------|-------|-------|-------|-------|
|            |                                     | control | NOX4    | NOX4+miR-322 mimic | Title | Title | Title | Title | Title | Title |
| 1          | Number of values                    | 3       | 3       | 3                  |       |       |       |       |       |       |
| 2          |                                     |         |         |                    |       |       |       |       |       |       |
| 3          | Minimum                             | 0.9366  | 1.816   | 0.5991             |       |       |       |       |       |       |
| 4          | 25% Percentile                      | 0.9366  | 1.816   | 0.5991             |       |       |       |       |       |       |
| 5          | Median                              | 0.992   | 1.925   | 0.806              |       |       |       |       |       |       |
| 6          | 75% Percentile                      | 1.071   | 2.002   | 1.08               |       |       |       |       |       |       |
| 7          | Maximum                             | 1.071   | 2.002   | 1.08               |       |       |       |       |       |       |
| 8          |                                     |         |         |                    |       |       |       |       |       |       |
| 9          | Mean                                | 1       | 1.914   | 0.8285             |       |       |       |       |       |       |
| 10         | Std. Deviation                      | 0.06781 | 0.09362 | 0.2414             |       |       |       |       |       |       |
| 11         | Std. Error of Mean                  | 0.03915 | 0.05405 | 0.1394             |       |       |       |       |       |       |
| 12         |                                     |         |         |                    |       |       |       |       |       |       |
| 13         | Lower 95% CI of mean                | 0.8316  | 1.682   | 0.2289             |       |       |       |       |       |       |
| 14         | Upper 95% CI of mean                | 1.168   | 2.147   | 1.428              |       |       |       |       |       |       |
| 15         |                                     |         |         |                    |       |       |       |       |       |       |
| 16         | Sum                                 | 3       | 5.743   | 2.485              |       |       |       |       |       |       |
| 17         |                                     |         |         |                    |       |       |       |       |       |       |
| 18         | Shapiro-Wilk normality test         |         |         |                    |       |       |       |       |       |       |
| 19         | W                                   | 0.9895  | 0.99    | 0.9935             |       |       |       |       |       |       |
| 20         | P value                             | 0.8041  | 0.8088  | 0.8463             |       |       |       |       |       |       |
| 21         | Passed normality test (alpha=0.05)? | Yes     | Yes     | Yes                |       |       |       |       |       |       |
| 22         |                                     |         |         |                    |       |       |       |       |       |       |

GraphPad Prism 7.00 - [Object in 统计图]

| 1way ANOVA |                                             | ANOVA        |         |                       |
|------------|---------------------------------------------|--------------|---------|-----------------------|
| 1          | Table Analyzed                              | Data 1       |         |                       |
| 2          | Data sets analyzed                          | A: control   | B: NOX4 | C: NOX4+miR-322 mimic |
| 3          |                                             |              |         |                       |
| 4          | ANOVA summary                               |              |         |                       |
| 5          | F                                           | 42.82        |         |                       |
| 6          | P value                                     | 0.0003       |         |                       |
| 7          | P value summary                             | ***          |         |                       |
| 8          | Significant diff. among means (P < 0.05)?   | Yes          |         |                       |
| 9          | R square                                    | 0.9345       |         |                       |
| 10         |                                             |              |         |                       |
| 11         | Brown-Forsythe test                         |              |         |                       |
| 12         | F (DFn, DFd)                                | 1.383 (2, 6) |         |                       |
| 13         | P value                                     | 0.3206       |         |                       |
| 14         | P value summary                             | ns           |         |                       |
| 15         | Are SDs significantly different (P < 0.05)? | No           |         |                       |
| 16         |                                             |              |         |                       |
| 17         | Bartlett's test                             |              |         |                       |
| 18         | Bartlett's statistic (corrected)            |              |         |                       |
| 19         | P value                                     |              |         |                       |
| 20         | P value summary                             |              |         |                       |
| 21         | Are SDs significantly different (P < 0.05)? |              |         |                       |
| 22         |                                             |              |         |                       |



GraphPad Prism 7.00 - [Object in 统计图]

File Edit View Insert Change Arrange Family Window Help

Prism File Sheet Undo Clipboard Analysis Interpret Change Draw Write Text Export Print Send LA Help

Family

Search results

Data Tables

Data 1

Info

Project info 1

Results

Col. stats of Data 1

Ordinary one-way ANOVA

ANOVA

Multiple comparisons

Graphs

Data 1

Layouts

| 1-way ANOVA          |                                     |            |                    |              |             |                  |     |                    |    |
|----------------------|-------------------------------------|------------|--------------------|--------------|-------------|------------------|-----|--------------------|----|
| Multiple comparisons |                                     |            |                    |              |             |                  |     |                    |    |
| 1                    | Number of families                  | 1          |                    |              |             |                  |     |                    |    |
| 2                    | Number of comparisons per family    | 2          |                    |              |             |                  |     |                    |    |
| 3                    | Alpha                               | 0.05       |                    |              |             |                  |     |                    |    |
| 4                    |                                     |            |                    |              |             |                  |     |                    |    |
| 5                    | Dunnett's multiple comparisons test | Mean Diff. | 95.00% CI of diff. | Significant? | Summary     | Adjusted P Value | B-7 |                    |    |
| 6                    |                                     |            |                    |              |             |                  |     |                    |    |
| 7                    | NOX4 vs. control                    | 0.9144     | 0.5532 to 1.276    | Yes          | ***         | 0.0007           | A   | control            |    |
| 8                    | NOX4 vs. NOX4+miR-322 mimic         | 1.086      | 0.7247 to 1.447    | Yes          | ***         | 0.0003           | C   | NOX4+miR-322 mimic |    |
| 9                    |                                     |            |                    |              |             |                  |     |                    |    |
| 10                   |                                     |            |                    |              |             |                  |     |                    |    |
| 11                   | Test details                        | Mean 1     | Mean 2             | Mean Diff.   | SE of diff. | n1               | n2  | q                  | DF |
| 12                   |                                     |            |                    |              |             |                  |     |                    |    |
| 13                   | NOX4 vs. control                    | 1.914      | 1                  | 0.9144       | 0.1262      | 3                | 3   | 7.248              | 6  |
| 14                   | NOX4 vs. NOX4+miR-322 mimic         | 1.914      | 0.8285             | 1.086        | 0.1262      | 3                | 3   | 8.608              | 6  |
| 15                   |                                     |            |                    |              |             |                  |     |                    |    |
| 16                   |                                     |            |                    |              |             |                  |     |                    |    |
| 17                   |                                     |            |                    |              |             |                  |     |                    |    |
| 18                   |                                     |            |                    |              |             |                  |     |                    |    |
| 19                   |                                     |            |                    |              |             |                  |     |                    |    |
| 20                   |                                     |            |                    |              |             |                  |     |                    |    |
| 21                   |                                     |            |                    |              |             |                  |     |                    |    |
| 22                   |                                     |            |                    |              |             |                  |     |                    |    |

Ordinary one-way ANOVA of Data 1 Multiple comparisons

Figure 4C

GraphPad Prism 7.00 - [Object in 论文图片]

|    | Group A | Group B | Group C            | Group D | Group E | Group F | Group G | Group H | Group I | Group J | Group K | Group L |
|----|---------|---------|--------------------|---------|---------|---------|---------|---------|---------|---------|---------|---------|
|    | control | NOX4    | NOX4+miR-322 mimic | Title   | Title   | Title   | Title   | Title   | Title   | Title   | Title   | Title   |
| 1  | Y       | Y       | Y                  | Y       | Y       | Y       | Y       | Y       | Y       | Y       | Y       | Y       |
| 2  | 55.0000 | 70.9251 |                    | 29.5081 |         |         |         |         |         |         |         |         |
| 3  | 40.1869 | 72.2891 |                    | 32.8042 |         |         |         |         |         |         |         |         |
| 4  | 43.0107 | 72.5274 |                    | 28.9473 |         |         |         |         |         |         |         |         |
| 5  |         |         |                    |         |         |         |         |         |         |         |         |         |
| 6  |         |         |                    |         |         |         |         |         |         |         |         |         |
| 7  |         |         |                    |         |         |         |         |         |         |         |         |         |
| 8  |         |         |                    |         |         |         |         |         |         |         |         |         |
| 9  |         |         |                    |         |         |         |         |         |         |         |         |         |
| 10 |         |         |                    |         |         |         |         |         |         |         |         |         |
| 11 |         |         |                    |         |         |         |         |         |         |         |         |         |
| 12 |         |         |                    |         |         |         |         |         |         |         |         |         |
| 13 |         |         |                    |         |         |         |         |         |         |         |         |         |
| 14 |         |         |                    |         |         |         |         |         |         |         |         |         |
| 15 |         |         |                    |         |         |         |         |         |         |         |         |         |
| 16 |         |         |                    |         |         |         |         |         |         |         |         |         |
| 17 |         |         |                    |         |         |         |         |         |         |         |         |         |
| 18 |         |         |                    |         |         |         |         |         |         |         |         |         |
| 19 |         |         |                    |         |         |         |         |         |         |         |         |         |
| 20 |         |         |                    |         |         |         |         |         |         |         |         |         |
| 21 |         |         |                    |         |         |         |         |         |         |         |         |         |
| 22 |         |         |                    |         |         |         |         |         |         |         |         |         |

GraphPad Prism 7.00 - [Object in 论文图片]

| Col. stats | A                                   | B      | C                  | D      | E     | F     | G     | H     | I     |
|------------|-------------------------------------|--------|--------------------|--------|-------|-------|-------|-------|-------|
|            | control                             | NOX4   | NOX4+miR-322 mimic | Title  | Title | Title | Title | Title | Title |
| 4          | Y                                   | Y      | Y                  | Y      | Y     | Y     | Y     | Y     | Y     |
| 5          | 25% Percentile                      | 40.19  | 70.93              | 28.95  |       |       |       |       |       |
| 6          | Median                              | 43.01  | 72.29              | 29.51  |       |       |       |       |       |
| 7          | 75% Percentile                      | 55     | 72.53              | 32.8   |       |       |       |       |       |
| 8          | Maximum                             | 55     | 72.53              | 32.8   |       |       |       |       |       |
| 9          | Mean                                | 46.07  | 71.91              | 30.42  |       |       |       |       |       |
| 10         | Std. Deviation                      | 7.865  | 0.8645             | 2.084  |       |       |       |       |       |
| 11         | Std. Error of Mean                  | 4.541  | 0.4991             | 1.203  |       |       |       |       |       |
| 12         |                                     |        |                    |        |       |       |       |       |       |
| 13         | Lower 95% CI of mean                | 26.53  | 69.77              | 25.24  |       |       |       |       |       |
| 14         | Upper 95% CI of mean                | 65.6   | 74.06              | 35.6   |       |       |       |       |       |
| 15         |                                     |        |                    |        |       |       |       |       |       |
| 16         | Sum                                 | 138.2  | 215.7              | 91.26  |       |       |       |       |       |
| 17         |                                     |        |                    |        |       |       |       |       |       |
| 18         | Shapiro-Wilk normality test         |        |                    |        |       |       |       |       |       |
| 19         | W                                   | 0.8868 | 0.8587             | 0.8564 |       |       |       |       |       |
| 20         | P value                             | 0.3447 | 0.2641             | 0.2578 |       |       |       |       |       |
| 21         | Passed normality test (alpha=0.05)? | Yes    | Yes                | Yes    |       |       |       |       |       |
| 22         | P value summary                     | ns     | ns                 | ns     |       |       |       |       |       |
| 23         |                                     |        |                    |        |       |       |       |       |       |
| 24         |                                     |        |                    |        |       |       |       |       |       |

GraphPad Prism 7.00 - [Object in 论文图片]

| 1way ANOVA |                                             | ANOVA        |         |                       |
|------------|---------------------------------------------|--------------|---------|-----------------------|
| 1          | Table Analyzed                              | Data 2       |         |                       |
| 2          | Data sets analyzed                          | A: control   | B: NOX4 | C: NOX4+miR-322 mimic |
| 3          |                                             |              |         |                       |
| 4          | ANOVA summary                               |              |         |                       |
| 5          | F                                           | 59.03        |         |                       |
| 6          | P value                                     | 0.0001       |         |                       |
| 7          | P value summary                             | ***          |         |                       |
| 8          | Significant diff. among means (P < 0.05)?   | Yes          |         |                       |
| 9          | R square                                    | 0.9516       |         |                       |
| 10         |                                             |              |         |                       |
| 11         | Brown-Forsythe test                         |              |         |                       |
| 12         | F (DFn, DFd)                                | 1.163 (2, 6) |         |                       |
| 13         | P value                                     | 0.3741       |         |                       |
| 14         | P value summary                             | ns           |         |                       |
| 15         | Are SDs significantly different (P < 0.05)? | No           |         |                       |
| 16         |                                             |              |         |                       |
| 17         | Bartlett's test                             |              |         |                       |
| 18         | Bartlett's statistic (corrected)            |              |         |                       |
| 19         | P value                                     |              |         |                       |
| 20         | P value summary                             |              |         |                       |
| 21         | Are SDs significantly different (P < 0.05)? |              |         |                       |

GraphPad Prism 7.00 - [Object in 论文图片]

File Edit View Insert Change Arrange Family Window Help

Prism File Sheet Undo Clipboard Analysis Interpret Change Draw Write Text Export Print Send LA Help

Family

Search results

Data Tables

Unpaired t test data

Data 2

Info

Results

Col. stats of Data 2

Ordinary one-way ANOVA

ANOVA

Multiple comparisons

Graphs

Unpaired t test data

Data 2

Layouts

Floating Notes

Data with notes

| 1way ANOVA           |                                     |            |                    |              |             |                  |     |                    |    |
|----------------------|-------------------------------------|------------|--------------------|--------------|-------------|------------------|-----|--------------------|----|
| Multiple comparisons |                                     |            |                    |              |             |                  |     |                    |    |
| 1                    | Number of families                  | 1          |                    |              |             |                  |     |                    |    |
| 2                    | Number of comparisons per family    | 2          |                    |              |             |                  |     |                    |    |
| 3                    | Alpha                               | 0.05       |                    |              |             |                  |     |                    |    |
| 4                    |                                     |            |                    |              |             |                  |     |                    |    |
| 5                    | Dunnett's multiple comparisons test | Mean Diff. | 95.00% CI of diff. | Significant? | Summary     | Adjusted P Value | B-? |                    |    |
| 6                    |                                     |            |                    |              |             |                  |     |                    |    |
| 7                    | NOX4 vs. control                    | 25.85      | 14.8 to 36.89      | Yes          | ***         | 0.0010           | A   | control            |    |
| 8                    | NOX4 vs. NOX4+miR-322 mimic         | 41.49      | 30.45 to 52.54     | Yes          | ****        | 0.0001           | C   | NOX4+miR-322 mimic |    |
| 9                    |                                     |            |                    |              |             |                  |     |                    |    |
| 10                   |                                     |            |                    |              |             |                  |     |                    |    |
| 11                   | Test details                        | Mean 1     | Mean 2             | Mean Diff.   | SE of diff. | n1               | n2  | q                  | DF |
| 12                   |                                     |            |                    |              |             |                  |     |                    |    |
| 13                   | NOX4 vs. control                    | 71.91      | 46.07              | 25.85        | 3.857       | 3                | 3   | 6.701              | 6  |
| 14                   | NOX4 vs. NOX4+miR-322 mimic         | 71.91      | 30.42              | 41.49        | 3.857       | 3                | 3   | 10.76              | 6  |
| 15                   |                                     |            |                    |              |             |                  |     |                    |    |
| 16                   |                                     |            |                    |              |             |                  |     |                    |    |
| 17                   |                                     |            |                    |              |             |                  |     |                    |    |
| 18                   |                                     |            |                    |              |             |                  |     |                    |    |
| 19                   |                                     |            |                    |              |             |                  |     |                    |    |
| 20                   |                                     |            |                    |              |             |                  |     |                    |    |
| 21                   |                                     |            |                    |              |             |                  |     |                    |    |

Ordinary one-way ANOVA of Data 2

Figure 5B

GraphPad Prism 7.00 - [Object in 统计图]

| Table format: | Outcome A  | Outcome B | Outcome C | Outcome D | Outcome E | Outcome F | Outcome G | Outcome H | Outcome I | Outcome J | Outcome K | Outcome L |
|---------------|------------|-----------|-----------|-----------|-----------|-----------|-----------|-----------|-----------|-----------|-----------|-----------|
| Contingency   | normal     | NTDs      | Title     | Title     | Title     | Title     | Title     | Title     | Title     | Title     | Title     | Title     |
| 1             | control    | 0         | 23        |           |           |           |           |           |           |           |           |           |
| 2             | ATRA       | 18        | 5         |           |           |           |           |           |           |           |           |           |
| 3             | ATRA+miR32 | 10        | 13        |           |           |           |           |           |           |           |           |           |
| 4             | Title      |           |           |           |           |           |           |           |           |           |           |           |
| 5             | Title      |           |           |           |           |           |           |           |           |           |           |           |
| 6             | Title      |           |           |           |           |           |           |           |           |           |           |           |
| 7             | Title      |           |           |           |           |           |           |           |           |           |           |           |
| 8             | Title      |           |           |           |           |           |           |           |           |           |           |           |
| 9             | Title      |           |           |           |           |           |           |           |           |           |           |           |
| 10            | Title      |           |           |           |           |           |           |           |           |           |           |           |
| 11            | Title      |           |           |           |           |           |           |           |           |           |           |           |
| 12            | Title      |           |           |           |           |           |           |           |           |           |           |           |
| 13            | Title      |           |           |           |           |           |           |           |           |           |           |           |
| 14            | Title      |           |           |           |           |           |           |           |           |           |           |           |
| 15            | Title      |           |           |           |           |           |           |           |           |           |           |           |
| 16            | Title      |           |           |           |           |           |           |           |           |           |           |           |
| 17            | Title      |           |           |           |           |           |           |           |           |           |           |           |
| 18            | Title      |           |           |           |           |           |           |           |           |           |           |           |
| 19            | Title      |           |           |           |           |           |           |           |           |           |           |           |
| 20            | Title      |           |           |           |           |           |           |           |           |           |           |           |
| 21            | Title      |           |           |           |           |           |           |           |           |           |           |           |
| 22            | Title      |           |           |           |           |           |           |           |           |           |           |           |
| 23            | Title      |           |           |           |           |           |           |           |           |           |           |           |
| 24            | Title      |           |           |           |           |           |           |           |           |           |           |           |

Retrospective (smoking and cancer) Row 10, Column G

GraphPad Prism 7.00 - [Project2:Contingency of Data 1]

| Contingency |                                       |               |                   |       |  |  |  |  |  |  |  |  |
|-------------|---------------------------------------|---------------|-------------------|-------|--|--|--|--|--|--|--|--|
| 3           | P value and statistical significance  |               |                   |       |  |  |  |  |  |  |  |  |
| 4           | Test                                  | Chi-square    |                   |       |  |  |  |  |  |  |  |  |
| 5           | Chi-square, df                        | 29.57, 1      |                   |       |  |  |  |  |  |  |  |  |
| 6           | z                                     | 5.438         |                   |       |  |  |  |  |  |  |  |  |
| 7           | P value                               | <0.0001       |                   |       |  |  |  |  |  |  |  |  |
| 8           | P value summary                       | ****          |                   |       |  |  |  |  |  |  |  |  |
| 9           | One- or two-sided                     | Two-sided     |                   |       |  |  |  |  |  |  |  |  |
| 10          | Statistically significant (P < 0.05)? | Yes           |                   |       |  |  |  |  |  |  |  |  |
| 11          |                                       |               |                   |       |  |  |  |  |  |  |  |  |
| 12          | Effect size                           | Value         | 95% CI            |       |  |  |  |  |  |  |  |  |
| 13          |                                       |               |                   |       |  |  |  |  |  |  |  |  |
| 14          | Odds ratio                            | Infinity      | 16.28 to Infinity |       |  |  |  |  |  |  |  |  |
| 15          | Reciprocal of odds ratio              | 0             | 0 to 0.06142      |       |  |  |  |  |  |  |  |  |
| 16          |                                       |               |                   |       |  |  |  |  |  |  |  |  |
| 17          | Methods used to compute CIs           |               |                   |       |  |  |  |  |  |  |  |  |
| 18          | Odds ratio                            | Baptista-Pike |                   |       |  |  |  |  |  |  |  |  |
| 19          |                                       |               |                   |       |  |  |  |  |  |  |  |  |
| 20          | Data analyzed                         | normal        | NTDs              | Total |  |  |  |  |  |  |  |  |
| 21          | control                               | 23            | 0                 | 23    |  |  |  |  |  |  |  |  |
| 22          | ATRA                                  | 5             | 18                | 23    |  |  |  |  |  |  |  |  |
| 23          | Total                                 | 28            | 18                | 46    |  |  |  |  |  |  |  |  |
| 24          |                                       |               |                   |       |  |  |  |  |  |  |  |  |

Contingency of Data 1 Tabular results

GraphPad Prism 7.00 - [Project2:Contingency of Data 1]

| Contingency |                                       |               |                   |       |  |  |  |  |  |  |  |  |
|-------------|---------------------------------------|---------------|-------------------|-------|--|--|--|--|--|--|--|--|
| 3           | P value and statistical significance  |               |                   |       |  |  |  |  |  |  |  |  |
| 4           | Test                                  | Chi-square    |                   |       |  |  |  |  |  |  |  |  |
| 5           | Chi-square, df                        | 5.841, 1      |                   |       |  |  |  |  |  |  |  |  |
| 6           | z                                     | 2.417         |                   |       |  |  |  |  |  |  |  |  |
| 7           | P value                               | 0.0157        |                   |       |  |  |  |  |  |  |  |  |
| 8           | P value summary                       | *             |                   |       |  |  |  |  |  |  |  |  |
| 9           | One- or two-sided                     | Two-sided     |                   |       |  |  |  |  |  |  |  |  |
| 10          | Statistically significant (P < 0.05)? | Yes           |                   |       |  |  |  |  |  |  |  |  |
| 11          |                                       |               |                   |       |  |  |  |  |  |  |  |  |
| 12          | Effect size                           | Value         | 95% CI            |       |  |  |  |  |  |  |  |  |
| 13          |                                       |               |                   |       |  |  |  |  |  |  |  |  |
| 14          | Odds ratio                            | 0.2137        | 0.06142 to 0.8346 |       |  |  |  |  |  |  |  |  |
| 15          | Reciprocal of odds ratio              | 4.68          | 1.198 to 16.28    |       |  |  |  |  |  |  |  |  |
| 16          |                                       |               |                   |       |  |  |  |  |  |  |  |  |
| 17          | Methods used to compute CIs           |               |                   |       |  |  |  |  |  |  |  |  |
| 18          | Odds ratio                            | Baptista-Pike |                   |       |  |  |  |  |  |  |  |  |
| 19          |                                       |               |                   |       |  |  |  |  |  |  |  |  |
| 20          | Data analyzed                         | normal        | NTDs              | Total |  |  |  |  |  |  |  |  |
| 21          | ATRA                                  | 5             | 18                | 23    |  |  |  |  |  |  |  |  |
| 22          | ATRA+miR322                           | 13            | 10                | 23    |  |  |  |  |  |  |  |  |
| 23          | Total                                 | 18            | 28                | 46    |  |  |  |  |  |  |  |  |
| 24          |                                       |               |                   |       |  |  |  |  |  |  |  |  |

Contingency of Data 1

Figure 5C

GraphPad Prism 7.00 - [Object in 统计图]

|    | Group A  | Group B  | Group C     | Group D | Group E | Group F | Group G | Group H | Group I | Group J | Group K | Group L |
|----|----------|----------|-------------|---------|---------|---------|---------|---------|---------|---------|---------|---------|
|    | control  | ATRA     | ATRA+miR322 | Title   | Title   | Title   | Title   | Title   | Title   | Title   | Title   | Title   |
| 1  | Y        | Y        | Y           | Y       | Y       | Y       | Y       | Y       | Y       | Y       | Y       | Y       |
| 2  | 1.058270 | 0.468110 | 2.554604    |         |         |         |         |         |         |         |         |         |
| 3  | 1.088525 | 0.374120 | 4.076139    |         |         |         |         |         |         |         |         |         |
| 4  | 1.013511 | 0.334710 | 3.486820    |         |         |         |         |         |         |         |         |         |
| 5  | 0.981851 | 0.402623 | 2.559421    |         |         |         |         |         |         |         |         |         |
| 6  | 1.078160 | 0.335448 | 2.983052    |         |         |         |         |         |         |         |         |         |
| 7  |          |          |             |         |         |         |         |         |         |         |         |         |
| 8  |          |          |             |         |         |         |         |         |         |         |         |         |
| 9  |          |          |             |         |         |         |         |         |         |         |         |         |
| 10 |          |          |             |         |         |         |         |         |         |         |         |         |
| 11 |          |          |             |         |         |         |         |         |         |         |         |         |
| 12 |          |          |             |         |         |         |         |         |         |         |         |         |
| 13 |          |          |             |         |         |         |         |         |         |         |         |         |
| 14 |          |          |             |         |         |         |         |         |         |         |         |         |
| 15 |          |          |             |         |         |         |         |         |         |         |         |         |
| 16 |          |          |             |         |         |         |         |         |         |         |         |         |
| 17 |          |          |             |         |         |         |         |         |         |         |         |         |
| 18 |          |          |             |         |         |         |         |         |         |         |         |         |
| 19 |          |          |             |         |         |         |         |         |         |         |         |         |
| 20 |          |          |             |         |         |         |         |         |         |         |         |         |
| 21 |          |          |             |         |         |         |         |         |         |         |         |         |
| 22 |          |          |             |         |         |         |         |         |         |         |         |         |

Data 1 Row 6, Column E

GraphPad Prism 7.00 - [Project2:Col. stats of Data 1]

| Col. stats | A                                   | B       | C                 | D      | E     | F     | G     | H     | I     |
|------------|-------------------------------------|---------|-------------------|--------|-------|-------|-------|-------|-------|
|            | control                             | ATRA    | ATRA+miR322 mimic | Title  | Title | Title | Title | Title | Title |
| 2          | Y                                   | Y       | Y                 | Y      | Y     | Y     | Y     | Y     | Y     |
| 3          | Minimum                             | 0.9819  | 0.3347            | 2.555  |       |       |       |       |       |
| 4          | 25% Percentile                      | 0.9977  | 0.3351            | 2.557  |       |       |       |       |       |
| 5          | Median                              | 1.018   | 0.3741            | 2.983  |       |       |       |       |       |
| 6          | 75% Percentile                      | 1.073   | 0.4354            | 3.781  |       |       |       |       |       |
| 7          | Maximum                             | 1.089   | 0.4681            | 4.076  |       |       |       |       |       |
| 8          |                                     |         |                   |        |       |       |       |       |       |
| 9          | Mean                                | 1.032   | 0.383             | 3.132  |       |       |       |       |       |
| 10         | Std. Deviation                      | 0.04186 | 0.05545           | 0.6521 |       |       |       |       |       |
| 11         | Std. Error of Mean                  | 0.01883 | 0.0248            | 0.2916 |       |       |       |       |       |
| 12         |                                     |         |                   |        |       |       |       |       |       |
| 13         | Lower 95% CI of mean                | 0.9803  | 0.3141            | 2.322  |       |       |       |       |       |
| 14         | Upper 95% CI of mean                | 1.084   | 0.4519            | 3.942  |       |       |       |       |       |
| 15         |                                     |         |                   |        |       |       |       |       |       |
| 16         | Sum                                 | 5.16    | 1.915             | 15.66  |       |       |       |       |       |
| 17         |                                     |         |                   |        |       |       |       |       |       |
| 18         | Shapiro-Wilk normality test         |         |                   |        |       |       |       |       |       |
| 19         | W                                   | 0.9614  | 0.8942            | 0.897  |       |       |       |       |       |
| 20         | P value                             | 0.8179  | 0.3785            | 0.3934 |       |       |       |       |       |
| 21         | Passed normality test (alpha=0.05)? | Yes     | Yes               | Yes    |       |       |       |       |       |
| 22         | P value summary                     | ns      | ns                | ns     |       |       |       |       |       |

Col. stats of Data 1 Column statistics

GraphPad Prism 7.00 - [Project2:Ordinary one-way ANOVA of Data 1]

| 1way ANOVA ANOVA |                                             |               |                              |
|------------------|---------------------------------------------|---------------|------------------------------|
| 1                | Table Analyzed                              | Data 1        |                              |
| 2                | Data sets analyzed                          | A: control    | B: ATRA C: ATRA+miR322 mimic |
| 3                |                                             |               |                              |
| 4                | ANOVA summary                               |               |                              |
| 5                | F                                           | 72.03         |                              |
| 6                | P value                                     | <0.0001       |                              |
| 7                | P value summary                             | ****          |                              |
| 8                | Significant diff. among means (P < 0.05)?   | Yes           |                              |
| 9                | R square                                    | 0.9231        |                              |
| 10               |                                             |               |                              |
| 11               | Brown-Forsythe test                         |               |                              |
| 12               | F (DFn, DFd)                                | 6.666 (2, 12) |                              |
| 13               | P value                                     | 0.0113        |                              |
| 14               | P value summary                             | *             |                              |
| 15               | Are SDs significantly different (P < 0.05)? | Yes           |                              |
| 16               |                                             |               |                              |
| 17               | Bartlett's test                             |               |                              |
| 18               | Bartlett's statistic (corrected)            | 25.81         |                              |
| 19               | P value                                     | <0.0001       |                              |
| 20               | P value summary                             | ****          |                              |
| 21               | Are SDs significantly different (P < 0.05)? | Yes           |                              |
| 22               |                                             |               |                              |

Ordinary one-way ANOVA of Data 1 ANOVA



GraphPad Prism 7.00 - [Project2:Ordinary one-way ANOVA of Data 1]

File Edit View Insert Change Arrange Family Window Help

Prism File Sheet Undo Clipboard Analysis Interpret Change Draw Write Text Export Print Send LA Help

Family

Search results

Data Tables

Data 1

Info

Project info 1

Results

Col. stats of Data 1

Ordinary one-way ANOVA

ANOVA

Multiple comparisons

Graphs

Data 1

Layouts

| 1way ANOVA           |                                     |            |                    |              |             |                  |     |                 |
|----------------------|-------------------------------------|------------|--------------------|--------------|-------------|------------------|-----|-----------------|
| Multiple comparisons |                                     |            |                    |              |             |                  |     |                 |
| 1                    | Number of families                  | 1          |                    |              |             |                  |     |                 |
| 2                    | Number of comparisons per family    | 2          |                    |              |             |                  |     |                 |
| 3                    | Alpha                               | 0.05       |                    |              |             |                  |     |                 |
| 4                    |                                     |            |                    |              |             |                  |     |                 |
| 5                    | Dunnett's multiple comparisons test | Mean Diff. | 95.00% CI of diff. | Significant? | Summary     | Adjusted P Value | A-? |                 |
| 6                    |                                     |            |                    |              |             |                  |     |                 |
| 7                    | control vs. ATRA                    | 0.649      | 0.04979 to 1.248   | Yes          | *           | 0.0344           | B   | ATRA            |
| 8                    | control vs. ATRA+miR322 mimic       | -2.1       | -2.699 to -1.501   | Yes          | ****        | 0.0001           | C   | ATRA+miR322 mim |
| 9                    |                                     |            |                    |              |             |                  |     |                 |
| 10                   |                                     |            |                    |              |             |                  |     |                 |
| 11                   | Test details                        | Mean 1     | Mean 2             | Mean Diff.   | SE of diff. | n1               | n2  | q               |
| 12                   |                                     |            |                    |              |             |                  |     |                 |
| 13                   | control vs. ATRA                    | 1.032      | 0.383              | 0.649        | 0.2394      | 5                | 5   | 2.71            |
| 14                   | control vs. ATRA+miR322 mimic       | 1.032      | 3.132              | -2.1         | 0.2394      | 5                | 5   | 8.77            |
| 15                   |                                     |            |                    |              |             |                  |     |                 |
| 16                   |                                     |            |                    |              |             |                  |     |                 |
| 17                   |                                     |            |                    |              |             |                  |     |                 |
| 18                   |                                     |            |                    |              |             |                  |     |                 |
| 19                   |                                     |            |                    |              |             |                  |     |                 |
| 20                   |                                     |            |                    |              |             |                  |     |                 |
| 21                   |                                     |            |                    |              |             |                  |     |                 |
| 22                   |                                     |            |                    |              |             |                  |     |                 |

Ordinary one-way ANOVA of Data 1 Multiple comparisons

Figure 5D (NOX4)

GraphPad Prism 7.00 - [Project1:Data 1]

|    | Group A  | Group B  | Group C  | Group D | Group E | Group F | Group G | Group H | Group I | Group J | Group K | Gr |
|----|----------|----------|----------|---------|---------|---------|---------|---------|---------|---------|---------|----|
| 1  | Y        | Y        | Y        | Y       | Y       | Y       | Y       | Y       | Y       | Y       | Y       |    |
| 2  | 0.922338 | 2.712946 | 0.649152 |         |         |         |         |         |         |         |         |    |
| 3  | 1.034571 | 1.481524 | 0.458234 |         |         |         |         |         |         |         |         |    |
| 4  | 1.043093 | 2.096229 | 0.582863 |         |         |         |         |         |         |         |         |    |
| 5  |          |          |          |         |         |         |         |         |         |         |         |    |
| 6  |          |          |          |         |         |         |         |         |         |         |         |    |
| 7  |          |          |          |         |         |         |         |         |         |         |         |    |
| 8  |          |          |          |         |         |         |         |         |         |         |         |    |
| 9  |          |          |          |         |         |         |         |         |         |         |         |    |
| 10 |          |          |          |         |         |         |         |         |         |         |         |    |
| 11 |          |          |          |         |         |         |         |         |         |         |         |    |
| 12 |          |          |          |         |         |         |         |         |         |         |         |    |
| 13 |          |          |          |         |         |         |         |         |         |         |         |    |
| 14 |          |          |          |         |         |         |         |         |         |         |         |    |
| 15 |          |          |          |         |         |         |         |         |         |         |         |    |
| 16 |          |          |          |         |         |         |         |         |         |         |         |    |
| 17 |          |          |          |         |         |         |         |         |         |         |         |    |
| 18 |          |          |          |         |         |         |         |         |         |         |         |    |
| 19 |          |          |          |         |         |         |         |         |         |         |         |    |
| 20 |          |          |          |         |         |         |         |         |         |         |         |    |
| 21 |          |          |          |         |         |         |         |         |         |         |         |    |
| 22 |          |          |          |         |         |         |         |         |         |         |         |    |

GraphPad Prism 7.00 - [Project1:Col. stats of Data 1]

| Col. stats | A                                   | B                 | C      | D       | E     | F     | G     | H     | I     |
|------------|-------------------------------------|-------------------|--------|---------|-------|-------|-------|-------|-------|
| control    | ATRA                                | ATRA+miR322 mimic | Title  | Title   | Title | Title | Title | Title | Title |
| 10         | Y                                   | Y                 | Y      | Y       | Y     | Y     | Y     | Y     | Y     |
| 10         | Std. Deviation                      | 0.06739           | 0.6157 | 0.09693 |       |       |       |       |       |
| 11         | Std. Error of Mean                  | 0.03891           | 0.3555 | 0.05596 |       |       |       |       |       |
| 12         |                                     |                   |        |         |       |       |       |       |       |
| 13         | Lower 95% CI of mean                | 0.8326            | 0.5674 | 0.3226  |       |       |       |       |       |
| 14         | Upper 95% CI of mean                | 1.167             | 3.626  | 0.8042  |       |       |       |       |       |
| 15         |                                     |                   |        |         |       |       |       |       |       |
| 16         | Sum                                 | 3                 | 6.291  | 1.69    |       |       |       |       |       |
| 17         |                                     |                   |        |         |       |       |       |       |       |
| 18         | Shapiro-Wilk normality test         |                   |        |         |       |       |       |       |       |
| 19         | W                                   | 0.8026            | 1      | 0.9698  |       |       |       |       |       |
| 20         | P value                             | 0.1208            | 0.9982 | 0.6665  |       |       |       |       |       |
| 21         | Passed normality test (alpha=0.05)? | Yes               | Yes    | Yes     |       |       |       |       |       |
| 22         | P value summary                     | ns                | ns     | ns      |       |       |       |       |       |
| 23         |                                     |                   |        |         |       |       |       |       |       |
| 24         |                                     |                   |        |         |       |       |       |       |       |
| 25         |                                     |                   |        |         |       |       |       |       |       |
| 26         |                                     |                   |        |         |       |       |       |       |       |
| 27         |                                     |                   |        |         |       |       |       |       |       |
| 28         |                                     |                   |        |         |       |       |       |       |       |
| 29         |                                     |                   |        |         |       |       |       |       |       |
| 30         |                                     |                   |        |         |       |       |       |       |       |
| 31         |                                     |                   |        |         |       |       |       |       |       |

GraphPad Prism 7.00 - [Project1:Ordinary one-way ANOVA of Data 1]

| 1way ANOVA |                                             |                                            |  |
|------------|---------------------------------------------|--------------------------------------------|--|
| 1          | Table Analyzed                              | Data 1                                     |  |
| 2          | Data sets analyzed                          | A : control B : ATRA C : ATRA+miR322 mimic |  |
| 3          |                                             |                                            |  |
| 4          | ANOVA summary                               |                                            |  |
| 5          | F                                           | 14.29                                      |  |
| 6          | P value                                     | 0.0052                                     |  |
| 7          | P value summary                             | **                                         |  |
| 8          | Significant diff. among means (P < 0.05)?   | Yes                                        |  |
| 9          | R square                                    | 0.8265                                     |  |
| 10         |                                             |                                            |  |
| 11         | Brown-Forsythe test                         |                                            |  |
| 12         | F (DFn, DFd)                                | 2.884 (2, 6)                               |  |
| 13         | P value                                     | 0.1326                                     |  |
| 14         | P value summary                             | ns                                         |  |
| 15         | Are SDs significantly different (P < 0.05)? | No                                         |  |
| 16         |                                             |                                            |  |
| 17         | Bartlett's test                             |                                            |  |
| 18         | Bartlett's statistic (corrected)            |                                            |  |
| 19         | P value                                     |                                            |  |
| 20         | P value summary                             |                                            |  |
| 21         | Are SDs significantly different (P < 0.05)? |                                            |  |



Figure 5D (Cleaved Caspase-3)

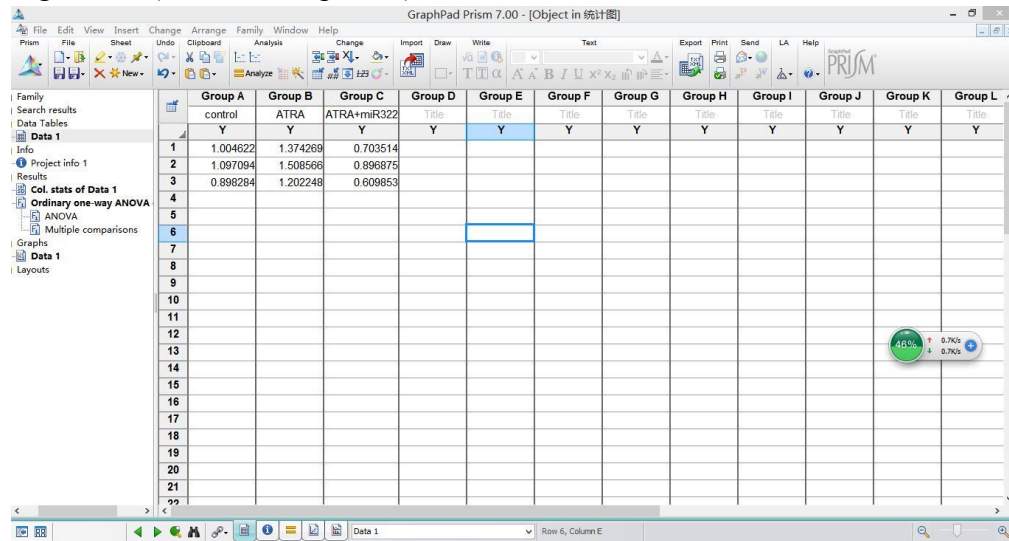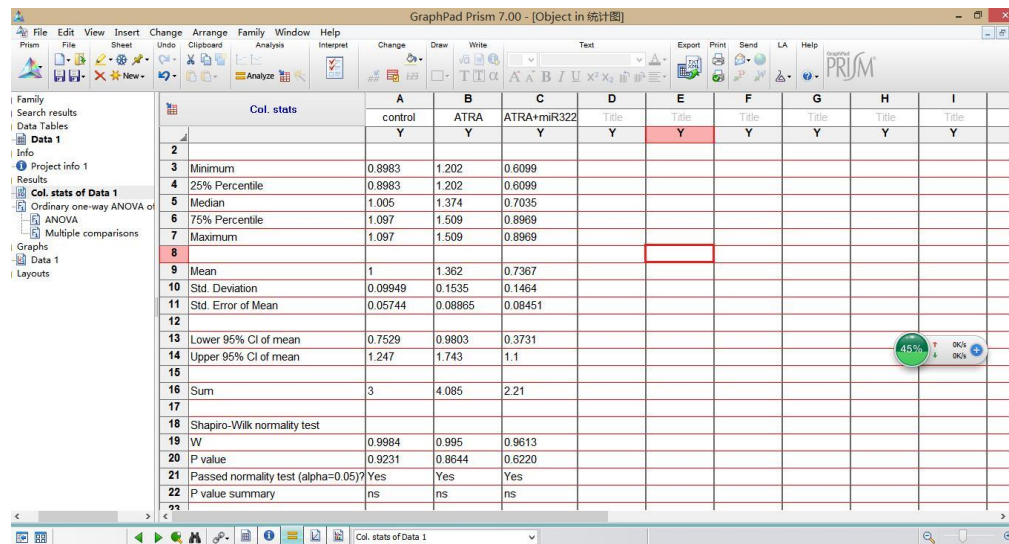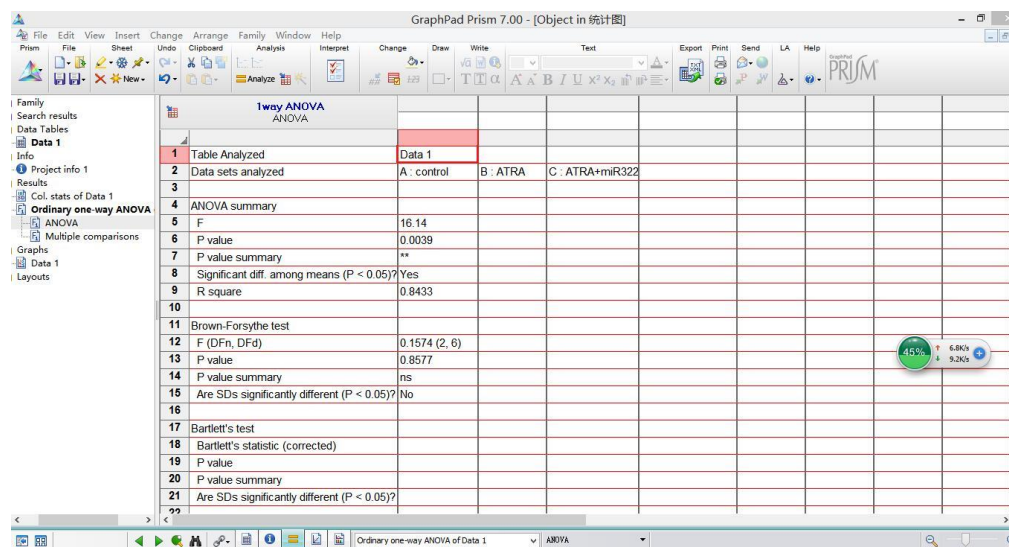

GraphPad Prism 7.00 - [Object in 统计图]

File Edit View Insert Change Arrange Family Window Help

Prism File Sheet Undo Clipboard Analysis Interpret Change Draw Write Text Export Print Send LA Help

Family

Search results

Data Tables

Data 1

Info

Project info 1

Results

Col. stats of Data 1

Ordinary one-way ANOVA

ANOVA

Multiple comparisons

Graphs

Data 1

Layouts

| 1-way ANOVA          |                                     |            |                    |              |             |                  |               |       |    |
|----------------------|-------------------------------------|------------|--------------------|--------------|-------------|------------------|---------------|-------|----|
| Multiple comparisons |                                     |            |                    |              |             |                  |               |       |    |
| 1                    | Number of families                  | 1          |                    |              |             |                  |               |       |    |
| 2                    | Number of comparisons per family    | 2          |                    |              |             |                  |               |       |    |
| 3                    | Alpha                               | 0.05       |                    |              |             |                  |               |       |    |
| 4                    |                                     |            |                    |              |             |                  |               |       |    |
| 5                    | Dunnett's multiple comparisons test | Mean Diff. | 95.00% CI of diff. | Significant? | Summary     | Adjusted P Value | B-?           |       |    |
| 6                    |                                     |            |                    |              |             |                  |               |       |    |
| 7                    | ATRA vs. control                    | 0.3617     | 0.04547 to 0.6779  | Yes          | *           | 0.0298           | A control     |       |    |
| 8                    | ATRA vs. ATRA+miR322                | 0.6249     | 0.3087 to 0.9412   | Yes          | **          | 0.0024           | C ATRA+miR322 |       |    |
| 9                    |                                     |            |                    |              |             |                  |               |       |    |
| 10                   |                                     |            |                    |              |             |                  |               |       |    |
| 11                   | Test details                        | Mean 1     | Mean 2             | Mean Diff.   | SE of diff. | n1               | n2            | q     | DF |
| 12                   |                                     |            |                    |              |             |                  |               |       |    |
| 13                   | ATRA vs. control                    | 1.362      | 1                  | 0.3617       | 0.1105      | 3                | 3             | 3.275 | 6  |
| 14                   | ATRA vs. ATRA+miR322                | 1.362      | 0.7367             | 0.6249       | 0.1105      | 3                | 3             | 5.658 | 6  |
| 15                   |                                     |            |                    |              |             |                  |               |       |    |
| 16                   |                                     |            |                    |              |             |                  |               |       |    |
| 17                   |                                     |            |                    |              |             |                  |               |       |    |
| 18                   |                                     |            |                    |              |             |                  |               |       |    |
| 19                   |                                     |            |                    |              |             |                  |               |       |    |
| 20                   |                                     |            |                    |              |             |                  |               |       |    |
| 21                   |                                     |            |                    |              |             |                  |               |       |    |

Ordinary one-way ANOVA of Data 1





GraphPad Prism 7.00 - [Project1:Ordinary one-way ANOVA of Data 1]

File Edit View Insert Change Arrange Family Window Help

Prism File Sheet Undo Clipboard Analysis Interpret Change Draw Write Text Export Print Send LA Help

Family

Search results

Data Tables

Data 1

Info

Project info 1

Results

Col. stats of Data 1

Ordinary one-way ANOVA

ANOVA

Multiple comparisons

Graphs

Data 1

Layouts

| 1-way ANOVA          |                                     |            |                    |              |             |                  |     |                   |    |
|----------------------|-------------------------------------|------------|--------------------|--------------|-------------|------------------|-----|-------------------|----|
| Multiple comparisons |                                     |            |                    |              |             |                  |     |                   |    |
| 1                    | Number of families                  | 1          |                    |              |             |                  |     |                   |    |
| 2                    | Number of comparisons per family    | 2          |                    |              |             |                  |     |                   |    |
| 3                    | Alpha                               | 0.05       |                    |              |             |                  |     |                   |    |
| 4                    |                                     |            |                    |              |             |                  |     |                   |    |
| 5                    | Dunnett's multiple comparisons test | Mean Diff. | 95.00% CI of diff. | Significant? | Summary     | Adjusted P Value | B-? |                   |    |
| 6                    |                                     |            |                    |              |             |                  |     |                   |    |
| 7                    | ATRA vs. control                    | 0.9435     | 0.4318 to 1.455    | Yes          | **          | 0.0034           | A   | control           |    |
| 8                    | ATRA vs. ATRA+miR322 mimic          | 1.303      | 0.7915 to 1.815    | Yes          | ***         | 0.0006           | C   | ATRA+miR322 mimic |    |
| 9                    |                                     |            |                    |              |             |                  |     |                   |    |
| 10                   |                                     |            |                    |              |             |                  |     |                   |    |
| 11                   | Test details                        | Mean 1     | Mean 2             | Mean Diff.   | SE of diff. | n1               | n2  | q                 | DF |
| 12                   |                                     |            |                    |              |             |                  |     |                   |    |
| 13                   | ATRA vs. control                    | 1.943      | 1                  | 0.9435       | 0.1787      | 3                | 3   | 5.279             | 6  |
| 14                   | ATRA vs. ATRA+miR322 mimic          | 1.943      | 0.6403             | 1.303        | 0.1787      | 3                | 3   | 7.292             | 6  |
| 15                   |                                     |            |                    |              |             |                  |     |                   |    |
| 16                   |                                     |            |                    |              |             |                  |     |                   |    |
| 17                   |                                     |            |                    |              |             |                  |     |                   |    |
| 18                   |                                     |            |                    |              |             |                  |     |                   |    |
| 19                   |                                     |            |                    |              |             |                  |     |                   |    |
| 20                   |                                     |            |                    |              |             |                  |     |                   |    |
| 21                   |                                     |            |                    |              |             |                  |     |                   |    |

Ordinary one-way ANOVA of Data 1 | Multiple comparisons

Figure 5E

GraphPad Prism 7.00 - [Object in 论文图片]

|   | Group A | Group B | Group C | Group D | Group E | Group F | Group G | Group H | Group I | Group J | Group K | Gr |
|---|---------|---------|---------|---------|---------|---------|---------|---------|---------|---------|---------|----|
| 1 | Y       | Y       | Y       | Y       | Y       | Y       | Y       | Y       | Y       | Y       | Y       |    |
| 2 | 8.6956  | 34.7490 | 17.4757 |         |         |         |         |         |         |         |         |    |
| 3 | 6.7669  | 37.2881 | 16.2337 |         |         |         |         |         |         |         |         |    |
| 4 | 11.6465 | 37.8048 | 16.6280 |         |         |         |         |         |         |         |         |    |

GraphPad Prism 7.00 - [Object in 论文图片]

| Col. stats | A                                   | B      | C                 | D      | E     | F     | G     | H     | I     |
|------------|-------------------------------------|--------|-------------------|--------|-------|-------|-------|-------|-------|
|            | control                             | ATRA   | ATRA+miR322 mimic | Title  | Title | Title | Title | Title | Title |
| 7          | Maximum                             | 11.65  | 37.8              | 17.48  |       |       |       |       |       |
| 9          | Mean                                | 9.036  | 38.61             | 16.78  |       |       |       |       |       |
| 10         | Std. Deviation                      | 2.458  | 1.636             | 0.6348 |       |       |       |       |       |
| 11         | Std. Error of Mean                  | 1.419  | 0.9443            | 0.3664 |       |       |       |       |       |
| 13         | Lower 95% CI of mean                | 2.931  | 32.55             | 15.2   |       |       |       |       |       |
| 14         | Upper 95% CI of mean                | 15.14  | 40.68             | 18.36  |       |       |       |       |       |
| 16         | Sum                                 | 27.11  | 109.8             | 50.34  |       |       |       |       |       |
| 18         | Shapiro-Wilk normality test         |        |                   |        |       |       |       |       |       |
| 19         | W                                   | 0.9856 | 0.8726            | 0.9575 |       |       |       |       |       |
| 20         | P value                             | 0.7701 | 0.3029            | 0.6033 |       |       |       |       |       |
| 21         | Passed normality test (alpha=0.05)? | Yes    | Yes               | Yes    |       |       |       |       |       |
| 22         | P value summary                     | ns     | ns                | ns     |       |       |       |       |       |

GraphPad Prism 7.00 - [Object in 论文图片]

| 1way ANOVA |                                             | ANOVA                |         |                      |
|------------|---------------------------------------------|----------------------|---------|----------------------|
| 1          | Table Analyzed                              | Unpaired t test data |         |                      |
| 2          | Data sets analyzed                          | A: control           | B: ATRA | C: ATRA+miR322 mimic |
| 4          | ANOVA summary                               |                      |         |                      |
| 5          | F                                           | 199.7                |         |                      |
| 6          | P value                                     | <0.0001              |         |                      |
| 7          | P value summary                             | ****                 |         |                      |
| 8          | Significant diff. among means (P < 0.05)?   | Yes                  |         |                      |
| 9          | R square                                    | 0.9852               |         |                      |
| 11         | Brown-Forsythe test                         |                      |         |                      |
| 12         | F (DFn, DFd)                                | 0.7828 (2, 6)        |         |                      |
| 13         | P value                                     | 0.4988               |         |                      |
| 14         | P value summary                             | ns                   |         |                      |
| 15         | Are SDs significantly different (P < 0.05)? | No                   |         |                      |
| 17         | Bartlett's test                             |                      |         |                      |
| 18         | Bartlett's statistic (corrected)            |                      |         |                      |
| 19         | P value                                     |                      |         |                      |
| 20         | P value summary                             |                      |         |                      |
| 21         | Are SDs significantly different (P < 0.05)? |                      |         |                      |

GraphPad Prism 7.00 - [Object in 论文图片]

File Edit View Insert Change Arrange Family Window Help

Prism File Sheet Undo Clipboard Analysis Interpret Change Draw Write Text Export Print Send LA Help

Family

Search results

Data Tables

Unpaired t test data

Info

Results

Col. stats of Unpaired t test

Ordinary one-way ANOVA

ANOVA

Multiple comparisons

Graphs

Unpaired t test data

Layouts

Floating Notes

Data with notes

**1way ANOVA**  
Multiple comparisons

|    |                                     |            |                    |              |             |                  |     |                   |    |
|----|-------------------------------------|------------|--------------------|--------------|-------------|------------------|-----|-------------------|----|
| 1  | Number of families                  | 1          |                    |              |             |                  |     |                   |    |
| 2  | Number of comparisons per family    | 2          |                    |              |             |                  |     |                   |    |
| 3  | Alpha                               | 0.05       |                    |              |             |                  |     |                   |    |
| 4  |                                     |            |                    |              |             |                  |     |                   |    |
| 5  | Dunnett's multiple comparisons test | Mean Diff. | 95.00% CI of diff. | Significant? | Summary     | Adjusted P Value | B-? |                   |    |
| 6  |                                     |            |                    |              |             |                  |     |                   |    |
| 7  | ATRA vs. control                    | 27.58      | 23.5 to 31.65      | Yes          | ****        | 0.0001           | A   | control           |    |
| 8  | ATRA vs. ATRA+miR322 mimic          | 19.83      | 15.76 to 23.91     | Yes          | ****        | 0.0001           | C   | ATRA+miR322 mimic |    |
| 9  |                                     |            |                    |              |             |                  |     |                   |    |
| 10 |                                     |            |                    |              |             |                  |     |                   |    |
| 11 | Test details                        | Mean 1     | Mean 2             | Mean Diff.   | SE of diff. | n1               | n2  | q                 | DF |
| 12 |                                     |            |                    |              |             |                  |     |                   |    |
| 13 | ATRA vs. control                    | 36.61      | 9.036              | 27.58        | 1.423       | 3                | 3   | 19.37             | 6  |
| 14 | ATRA vs. ATRA+miR322 mimic          | 36.61      | 16.78              | 19.83        | 1.423       | 3                | 3   | 13.93             | 6  |
| 15 |                                     |            |                    |              |             |                  |     |                   |    |
| 16 |                                     |            |                    |              |             |                  |     |                   |    |
| 17 |                                     |            |                    |              |             |                  |     |                   |    |
| 18 |                                     |            |                    |              |             |                  |     |                   |    |
| 19 |                                     |            |                    |              |             |                  |     |                   |    |
| 20 |                                     |            |                    |              |             |                  |     |                   |    |
| 21 |                                     |            |                    |              |             |                  |     |                   |    |

Ordinary one-way ANOVA of Unpaired t test d... Multiple comparisons
